# Supplementary material for: DMAP-promoted domino annulation of β-ketothioamides with internal alkynes: a highly regioselective access to functionalized 1,3-thiazolidin-4-ones at room temperature
Source: Royal Society of Chemistry journal article supplement (doi:10.1039/c4ra00131a), 2014-01-01
Supplement: c4ra00131a1.pdf [file c4ra00131a1.pdf]

# **DMAP-Promoted domino annulation of $\beta$ -ketothioamides with internal alkynes: A highly regioselective access to functionalized 1,3-thiazolidin-4-ones at room temperature**

Girijesh Kumar Verma,<sup>a</sup> Gaurav Shukla,<sup>a</sup> Anugula Nagaraju,<sup>a</sup> Abhijeet Srivastava,<sup>a</sup>  
Keshav Raghuvanshi<sup>b</sup> and Maya Shankar Singh<sup>\*a</sup>

<sup>a</sup> Department of Chemistry, Faculty of Science, Banaras Hindu University, Varanasi-221005, India Fax:+91 542 2368127; e-mail: mssinghbhu@yahoo.co.in

<sup>b</sup> Institut fuer Organische und Biomolekulare Chemie, Georg-August-Universität Göttingen  
Tammannstr. 2, 37077 Goettingen

## **Supporting Information**

### **Table of Content**

|                                                                                             |        |
|---------------------------------------------------------------------------------------------|--------|
| 1. General scheme                                                                           | S2     |
| 2. Copies of <sup>1</sup> H and <sup>13</sup> C NMR spectra of the compounds <b>3aa-3wb</b> | S3—S58 |

- **General Scheme:** Starting materials **1** and **2** are defined in the following general reaction Scheme 1.

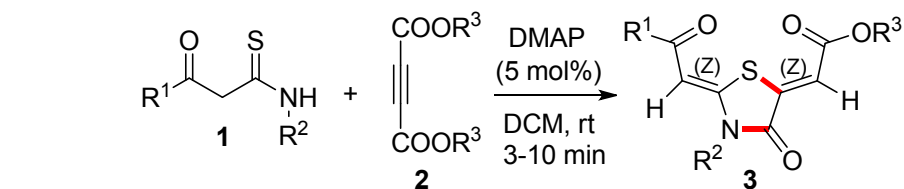

**1a:** R<sup>1</sup> = Ph; R<sup>2</sup> = Ph;      **2a:** R<sup>3</sup> = Et

**1b:** R<sup>1</sup> = 4-Br-C<sub>6</sub>H<sub>4</sub>; R<sup>2</sup> = Ph;      **2b:** R<sup>3</sup> = Me

**1c:** R<sup>1</sup> = 4-Me-C<sub>6</sub>H<sub>4</sub>; R<sup>2</sup> = Ph;

**1d:** R<sup>1</sup> = 2-Cl-C<sub>6</sub>H<sub>4</sub>; R<sup>2</sup> = Ph;

**1e:** R<sup>1</sup> = 3,4-OCH<sub>2</sub>O-C<sub>6</sub>H<sub>3</sub>; R<sup>2</sup> = Ph;

**1f:** R<sup>1</sup> = 4-Ph-C<sub>6</sub>H<sub>4</sub>; R<sup>2</sup> = Ph;

**1g:** R<sup>1</sup> = 1-naphthyl; R<sup>2</sup> = Ph;

**1h:** R<sup>1</sup> = 2-thienyl; R<sup>2</sup> = Ph;

**1i:** R<sup>1</sup> = 2-furyl; R<sup>2</sup> = Ph;

**1j:** R<sup>1</sup> = *i*-propyl; R<sup>2</sup> = Ph;

**1k:** R<sup>1</sup> = *t*-butyl; R<sup>2</sup> = Ph;

**1l:** R<sup>1</sup> = 4-Br-C<sub>6</sub>H<sub>4</sub>; R<sup>2</sup> = Me;

**1m:** R<sup>1</sup> = 4-Me-C<sub>6</sub>H<sub>4</sub>; R<sup>2</sup> = Me;

**1n:** R<sup>1</sup> = 3,4-OCH<sub>2</sub>O-C<sub>6</sub>H<sub>3</sub>; R<sup>2</sup> = Me

**1o:** R<sup>1</sup> = 2-thienyl; R<sup>2</sup> = Me;

**1p:** R<sup>1</sup> = 4-OMe-C<sub>6</sub>H<sub>4</sub>; R<sup>2</sup> = *n*-butyl;

**1q:** R<sup>1</sup> = 2-thienyl; R<sup>2</sup> = *n*-butyl;

**1r:** R<sup>1</sup> = 4-OMe-C<sub>6</sub>H<sub>4</sub>; R<sup>2</sup> = cyclopropyl;

**1s:** R<sup>1</sup> = 2-thienyl; R<sup>2</sup> = cyclopropyl;

**1t:** R<sup>1</sup> = 2-thienyl; R<sup>2</sup> = cyclohexyl;

**1u:** R<sup>1</sup> = 2-thienyl; R<sup>2</sup> = PhCH<sub>2</sub>;

**1v:** R<sup>1</sup> = 1-naphthyl; R<sup>2</sup> = 4-Cl-C<sub>6</sub>H<sub>4</sub>CH<sub>2</sub>.

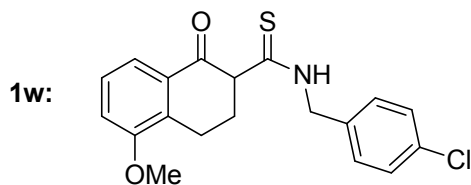

**Scheme 1** Synthesis of thiazolidine-4-one derivatives **3**.

## Copies of $^1\text{H}$ & $^{13}\text{C}$ -NMR Spectra

### $^1\text{H}$ & $^{13}\text{C}$ -NMR Spectra of 3aa:

C:\WINNMR98\Data\DEAD-1A\_1H1NON\_E5.als  
DEAD-1A\_1H Mr. G.K. Verma

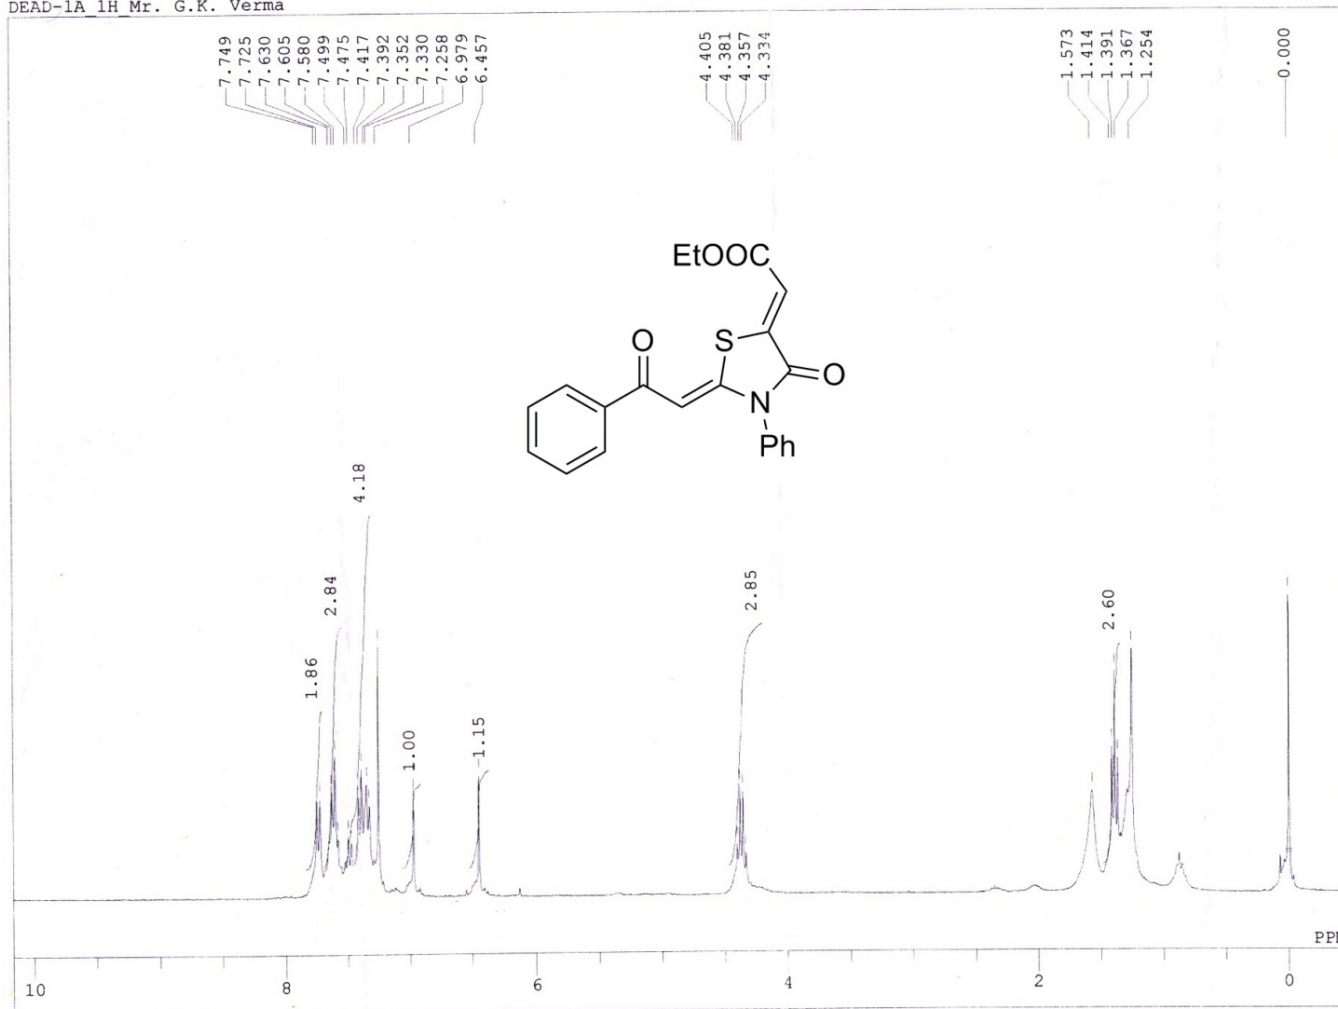

JEOL AL300 FTNMR  
CHEMISTRY DEPARTMENT  
Banaras Hindu University  
VARANASI-221005

Operator : Nagendra Kuma  
Shishir Singh

DFILE C:\WINNMR98\Data\  
COMNT DEAD-1A\_1H Mr. G.  
DATIM Fri Nov 09 14:26:  
OBNUC 1H  
EXMOD NON  
OBFRQ 300.40 MHz  
OBSET 130.00 KHz  
OBFIN 1150.0 Hz  
POINT 32768  
FREQU 6016.8 Hz  
SCANS 32  
ACQTM 5.446 sec  
PD 1.547 sec  
PW1 5.2 us  
IRNUC 1H  
CTEMP 19.1 c  
SLVNT CDCL3  
EXREF 0.00 ppm  
BF 1.20 Hz  
RGAIN 21

C:\WINNMR98\Data\DEAD-1A\_13C1BCM\_E5.als  
DEAD-1A 13C Mr.G.K.Verma

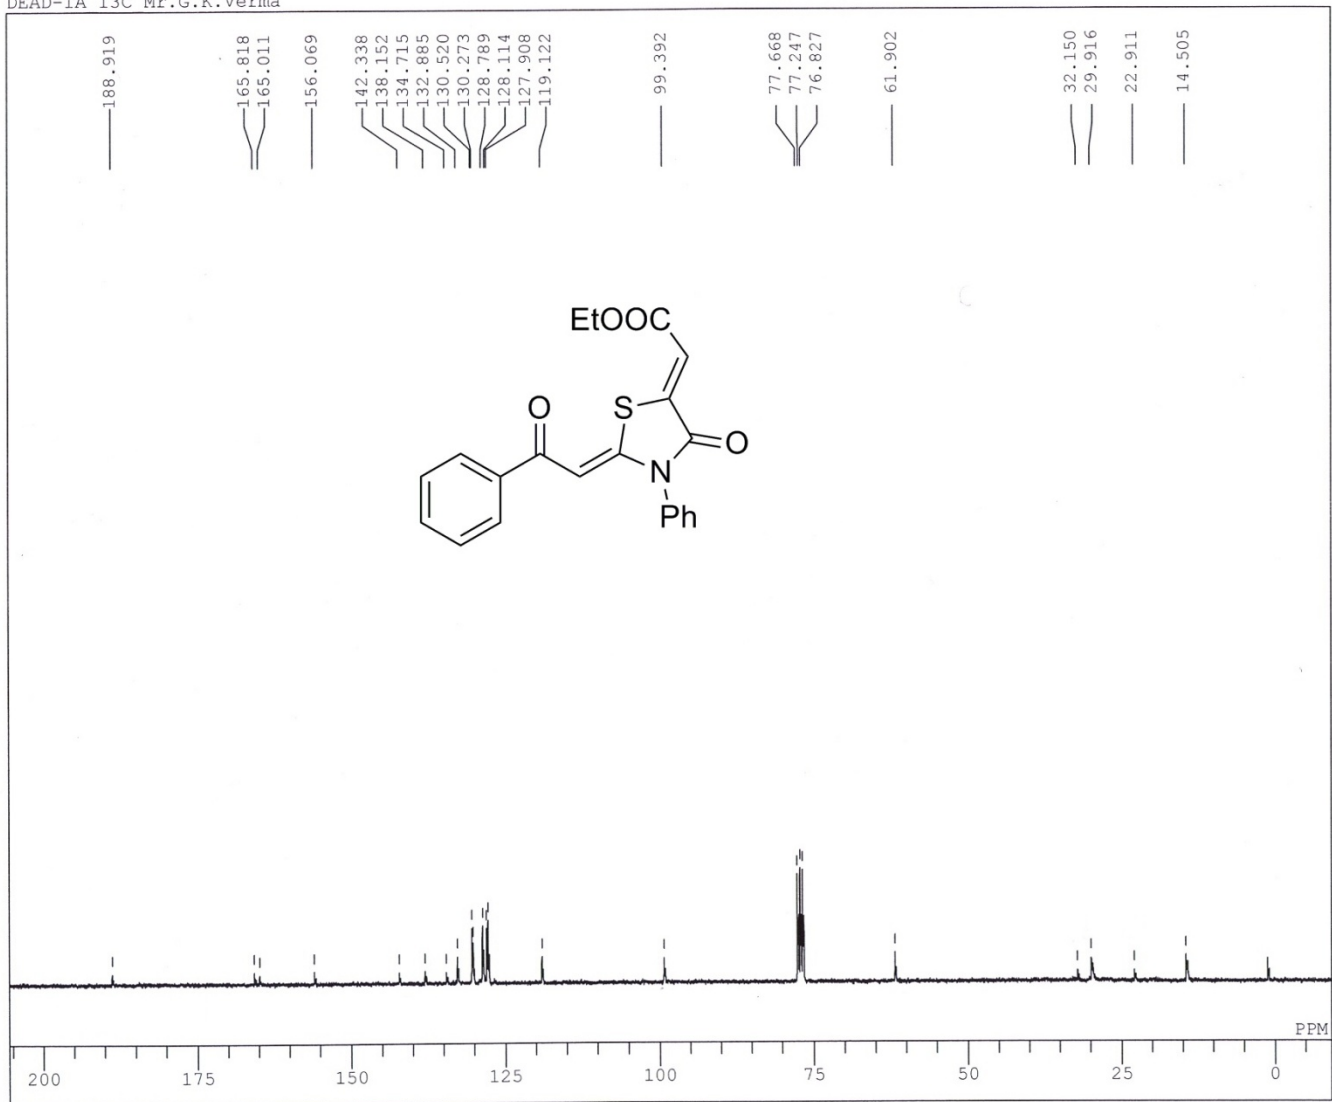

JEOL AL300 FTNMR  
CHEMISTRY DEPARTMENT  
Banaras Hindu University,  
VARANASI-221005

Operator : Nagendra Kumar  
Shishir Singh

DFILE C:\WINNMR98\Data\DEAD-1  
COMNT DEAD-1A 13C Mr.G.K.Verr  
DATIM Sat Nov 10 04:08:38 20  
OBNUC 13C  
EXMOD BCM  
OBFRQ 75.45 MHz  
OBSET 127.30 KHz  
OBFIN 44.7 Hz  
POINT 32768  
FREQU 20408.1 Hz  
SCANS 2176  
ACQTM 1.606 sec  
PD 1.394 sec  
PW1 6.0 us  
IRNUC 1H  
CTEMP 18.7 c  
SLVNT CDCL3  
EXREF 77.00 ppm  
BF 1.20 Hz  
RGAIN 25

# <sup>1</sup>H & <sup>13</sup>C-NMR Spectra of 3ba:

C:\WINNMR98\Data\DEAD-6D\_1H1NON\_E6.als  
DEAD-6D 1H Mr. Girijesh

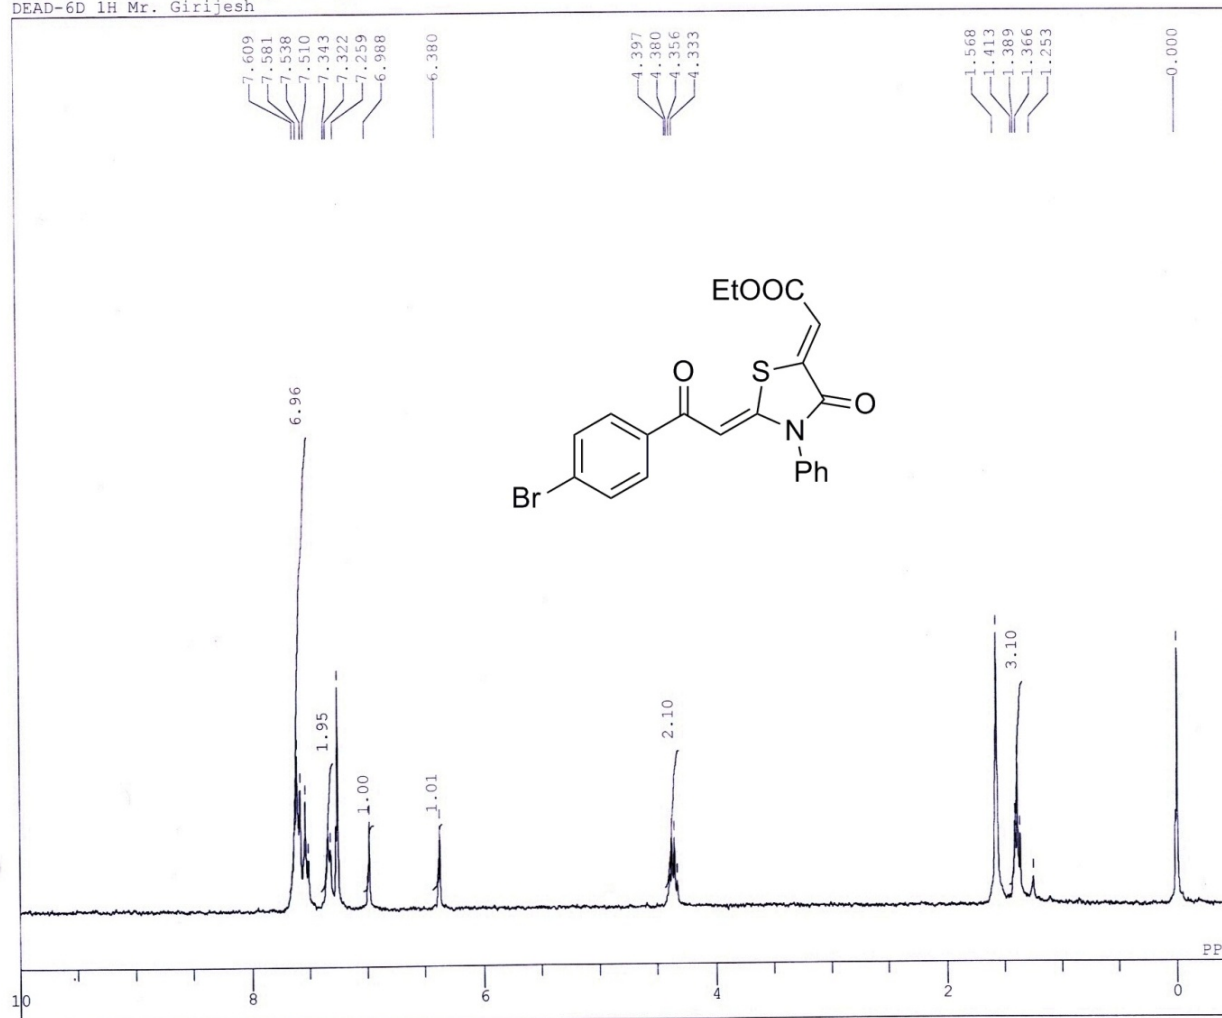

JEOL AL300 FTNMR  
CHEMISTRY DEPARTMENT  
Banaras Hindu University,  
VARANASI-221005

Operator : Nagendra Kumar  
Shishir Singh

DFILE C:\WINNMR98\Data\DEAD-6D\_1H1NON\_E6.als  
COMNT DEAD-6D\_1H Mr. Girijesh  
DATIM Mon Nov 25 13:17:15 2013  
OBNUC 1H  
EXMOD NON  
OBFRQ 300.40 MHz  
OBSET 130.00 KHz  
OBFIN 1150.0 Hz  
POINT 32768  
FREQU 6016.8 Hz  
SCANS 32  
ACQTM 5.446 sec  
PD 1.547 sec  
PW1 5.6 us  
IRNUC 1H  
CTEMP 20.5 c  
SLVNT CDCL3  
EXREF 0.00 ppm  
BF 1.20 Hz  
RGAIN 28

C:\WINNMR98\Data\DEAD-6\_13C1BCM\_E4.ais  
DEAD-6 13C Mr.G.K.Verma

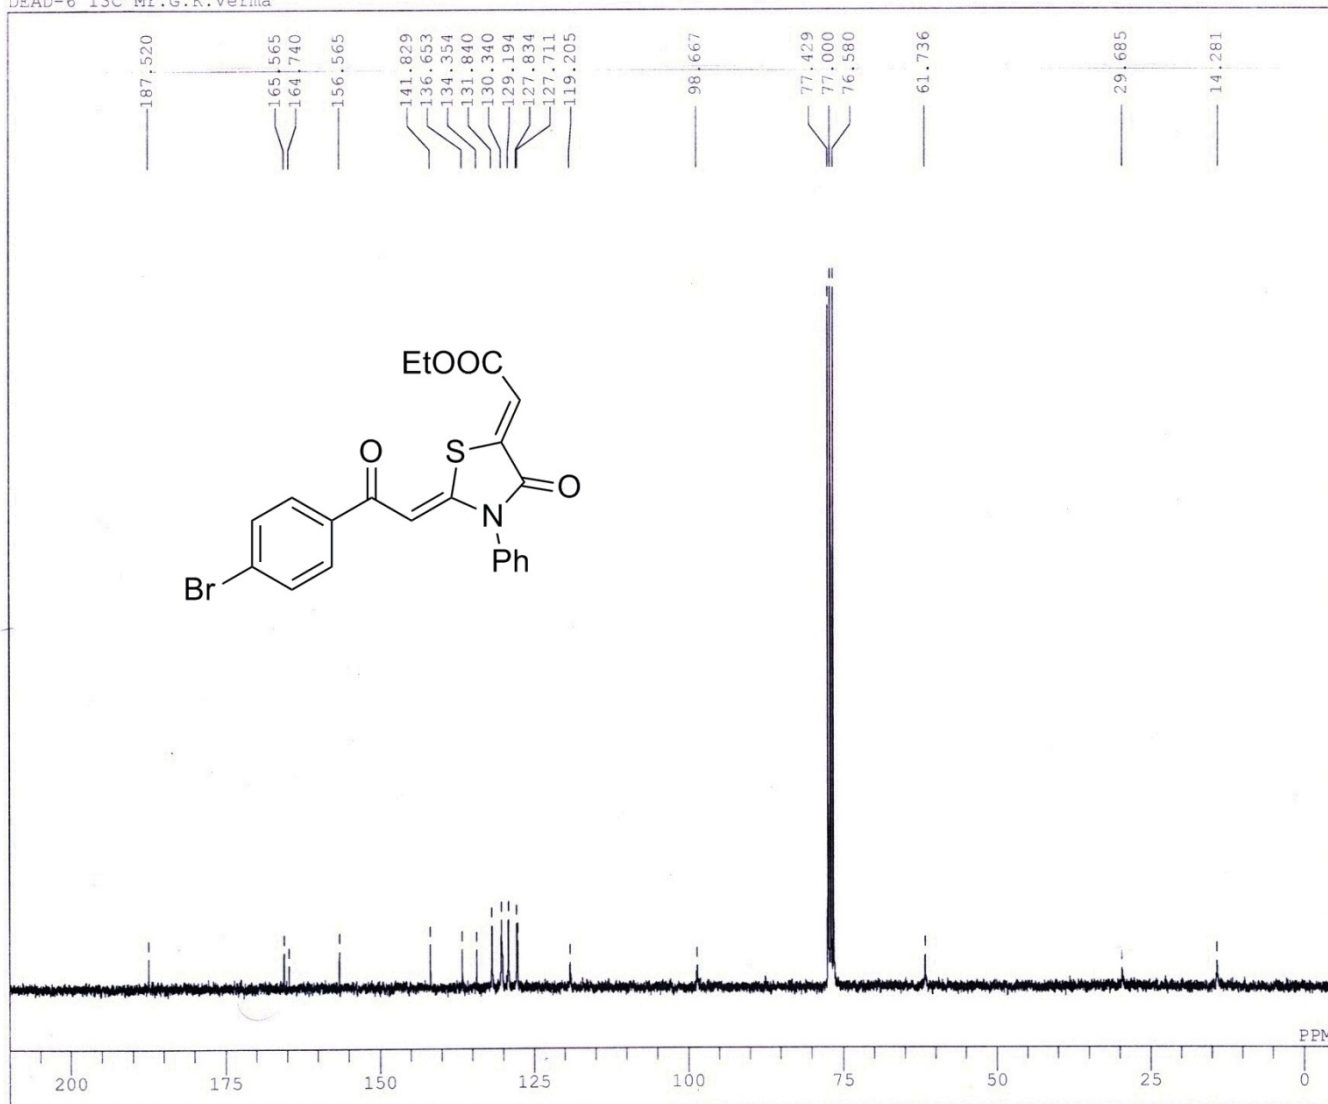

JEOL AL300 FTNMR  
CHEMISTRY DEPARTMENT  
Banaras Hindu University,  
VARANASI-221005

Operator : Nagendra Kumar  
Shishir Singh

DFILE C:\WINNMR98\Data\DEAD-6  
COMNT DEAD-6\_13C\_Mr.G.K.Verma  
DATIM Tue Jun 04 02:53:06 2004  
OBNUC 13C  
EXMOD BCM  
OBFRQ 75.45 MHz  
OBSET 124.00 KHz  
OBFIN 1840.0 Hz  
POINT 32768  
FREQU 20408.1 Hz  
SCANS 2500  
ACQTM 1.606 sec  
PD 1.394 sec  
PW1 5.9 us  
IRNUC 1H  
CTEMP 19.6 c  
SLVNT CDCL3  
EXREF 77.00 ppm  
BF 1.20 Hz  
RGAIN 18

# <sup>1</sup>H & <sup>13</sup>C-NMR Spectra of 3ca:

C:\WINNMR98\COMMON\\_DEFAULT.ALS  
DEAD-2D 1H Mr. G. K. Verma

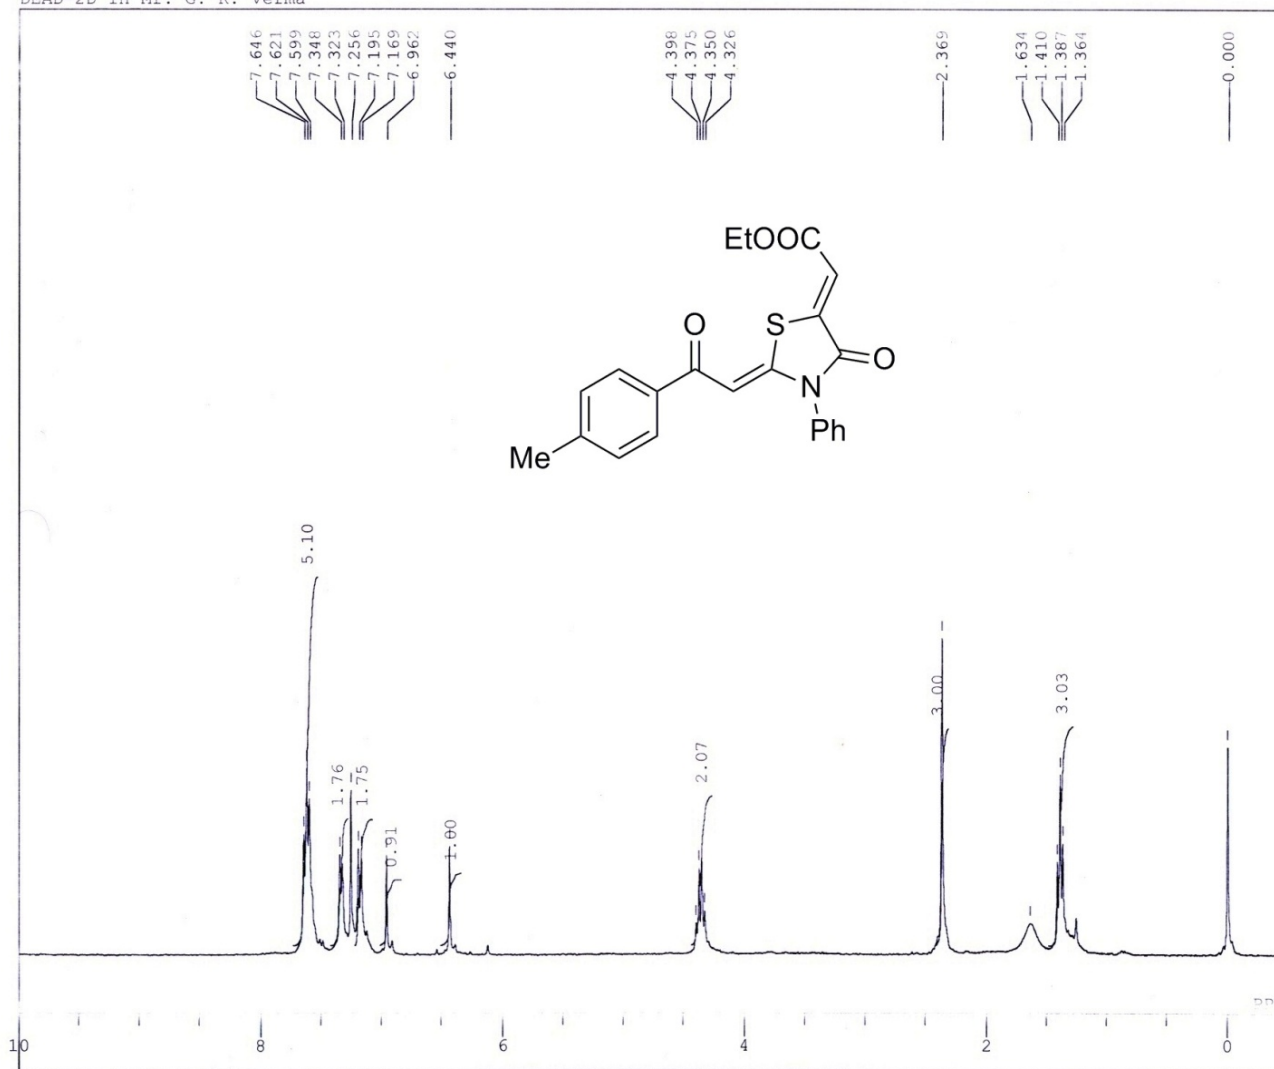

JEOL AL300 FTNMR  
CHEMISTRY DEPARTMENT  
Banaras Hindu University,  
VARANASI-221005

Operator : Nagendra Kumar  
Shishir Singh

DFILE C:\WINNMR98\COMMON\\_DEI  
COMNT DEAD-2D 1H Mr. G. K. Ve  
DATIM Tue Nov 26 17:40:49 20:  
OBNUC 1H  
EXMOD NON  
OBFRQ 300.40 MHz  
OBSET 130.00 KHz  
OBFIN 1150.0 Hz  
POINT 32768  
FREQU 9505.7 Hz  
SCANS 8  
ACQTM 3.447 sec  
PD 1.547 sec  
PW1 5.2 us  
IRNUC 1H  
CTEMP 20.9 c  
SLVNT CDCL3  
EXREF 0.00 ppm  
BF 1.22 Hz  
RGAIN 22

C:\Girijesh K. Verma\DEAD-2A\_13C.als  
DEAD-2A 13C Mr.G.K.Verma

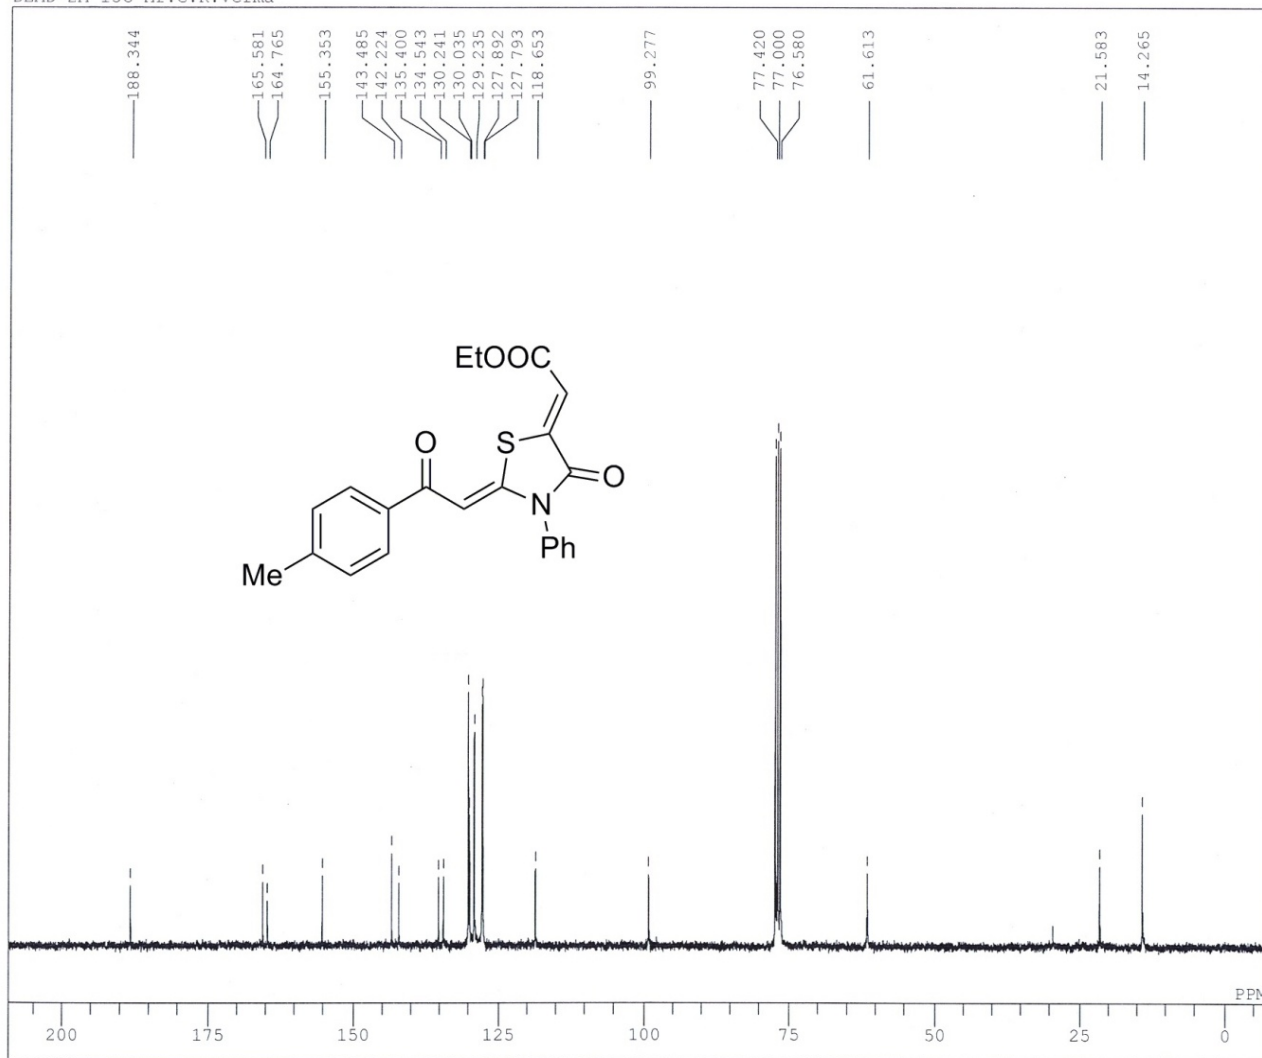

JEOL AL300 FTNMR  
CHEMISTRY DEPARTMENT  
Banaras Hindu University,  
VARANASI-221005

Operator : Nagendra Kumar  
Shishir Singh

DFILE C:\Girijesh K. Verma\DI  
COMNT DEAD-2A\_13C\_Mr.G.K.Verr  
DATIM Tue Jun 25 02:14:39 20  
OBNUC 13C  
EXMOD BCM  
OBFRQ 75.45 MHz  
OBSET 124.00 KHz  
OBFIN 1840.0 Hz  
POINT 32768  
FREQU 20408.1 Hz  
SCANS 2500  
ACQTM 1.606 sec  
PD 1.394 sec  
PW1 5.9 us  
IRNUC 1H  
CTEMP 24.0 c  
SLVNT CDCL3  
EXREF 77.00 ppm  
BF 1.20 Hz  
RGAIN 23



# <sup>1</sup>H & <sup>13</sup>C-NMR Spectra of 3da:

C:\Girijesh K. Verma\DEAD-10A\_1H.als  
DEAD-10A\_1H Mr.G.K.Verma

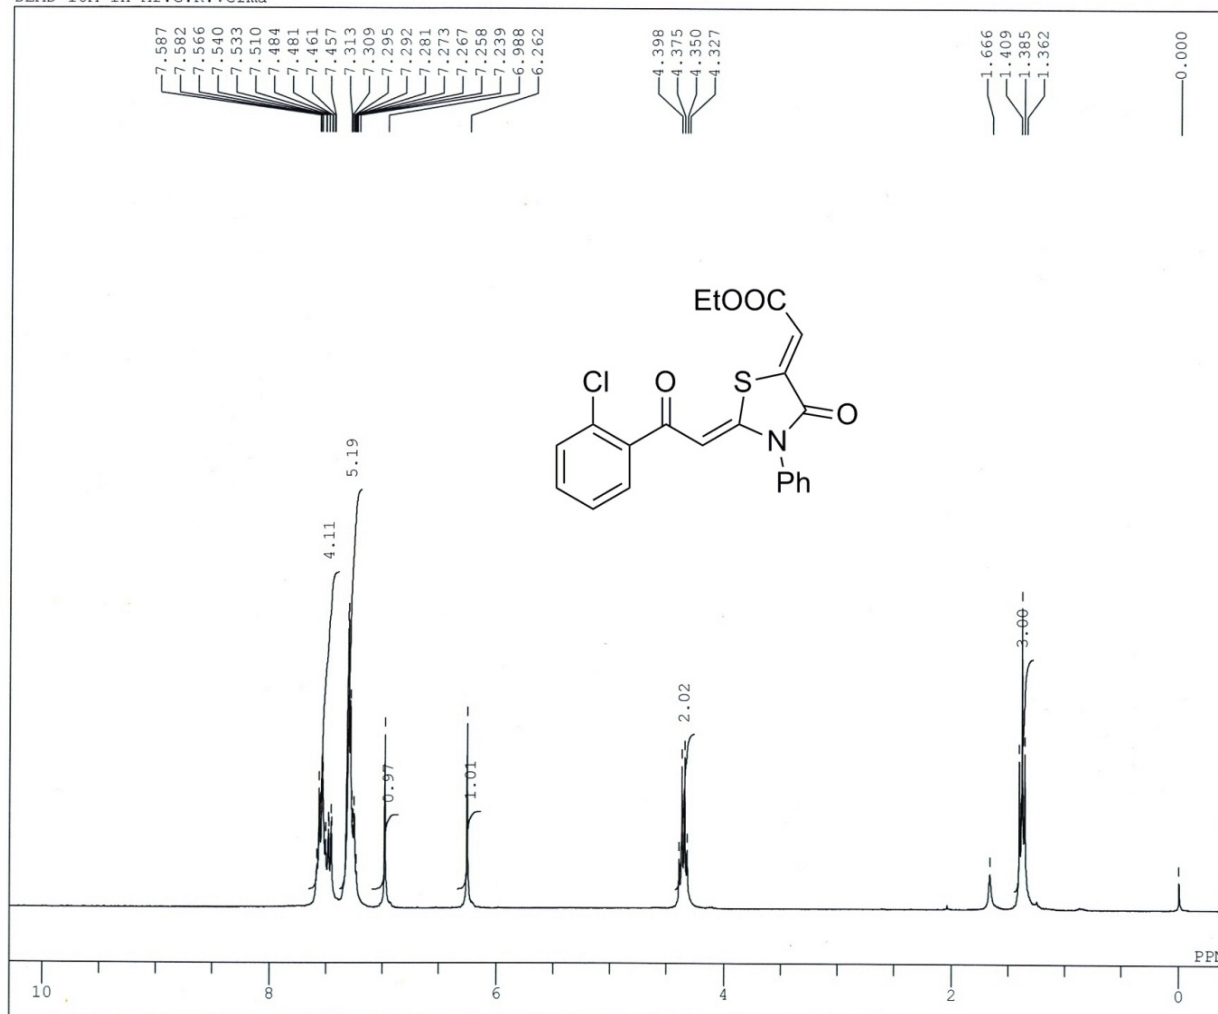

JEOL AL300 FTNMR  
CHEMISTRY DEPARTMENT  
Banaras Hindu University,  
VARANASI-221005

Operator : Nagendra Kumar  
Shishir Singh

DFILE C:\Girijesh K. Verma\DI  
COMNT DEAD-10A\_1H Mr.G.K.Verr  
DATIM Thu Jul 04 13:26:03 20:  
OBNUC 1H  
EXMOD NON  
OBFREQ 300.40 MHz  
OBSET 130.00 KHz  
OBFIN 1150.0 Hz  
POINT 32768  
FREQU 9505.7 Hz  
SCANS 16  
ACQTM 3.447 sec  
PD 1.547 sec  
PW1 5.2 us  
IRNUC 1H  
CTEMP 24.9 c  
SLVNT CDCL3  
EXREF 0.00 ppm  
BF 0.12 Hz  
RGAIN 16

C:\Girijesh K. Verma\DEAD-10A\_13C.als  
DEAD-10A 13C Mr. G.K. Verma

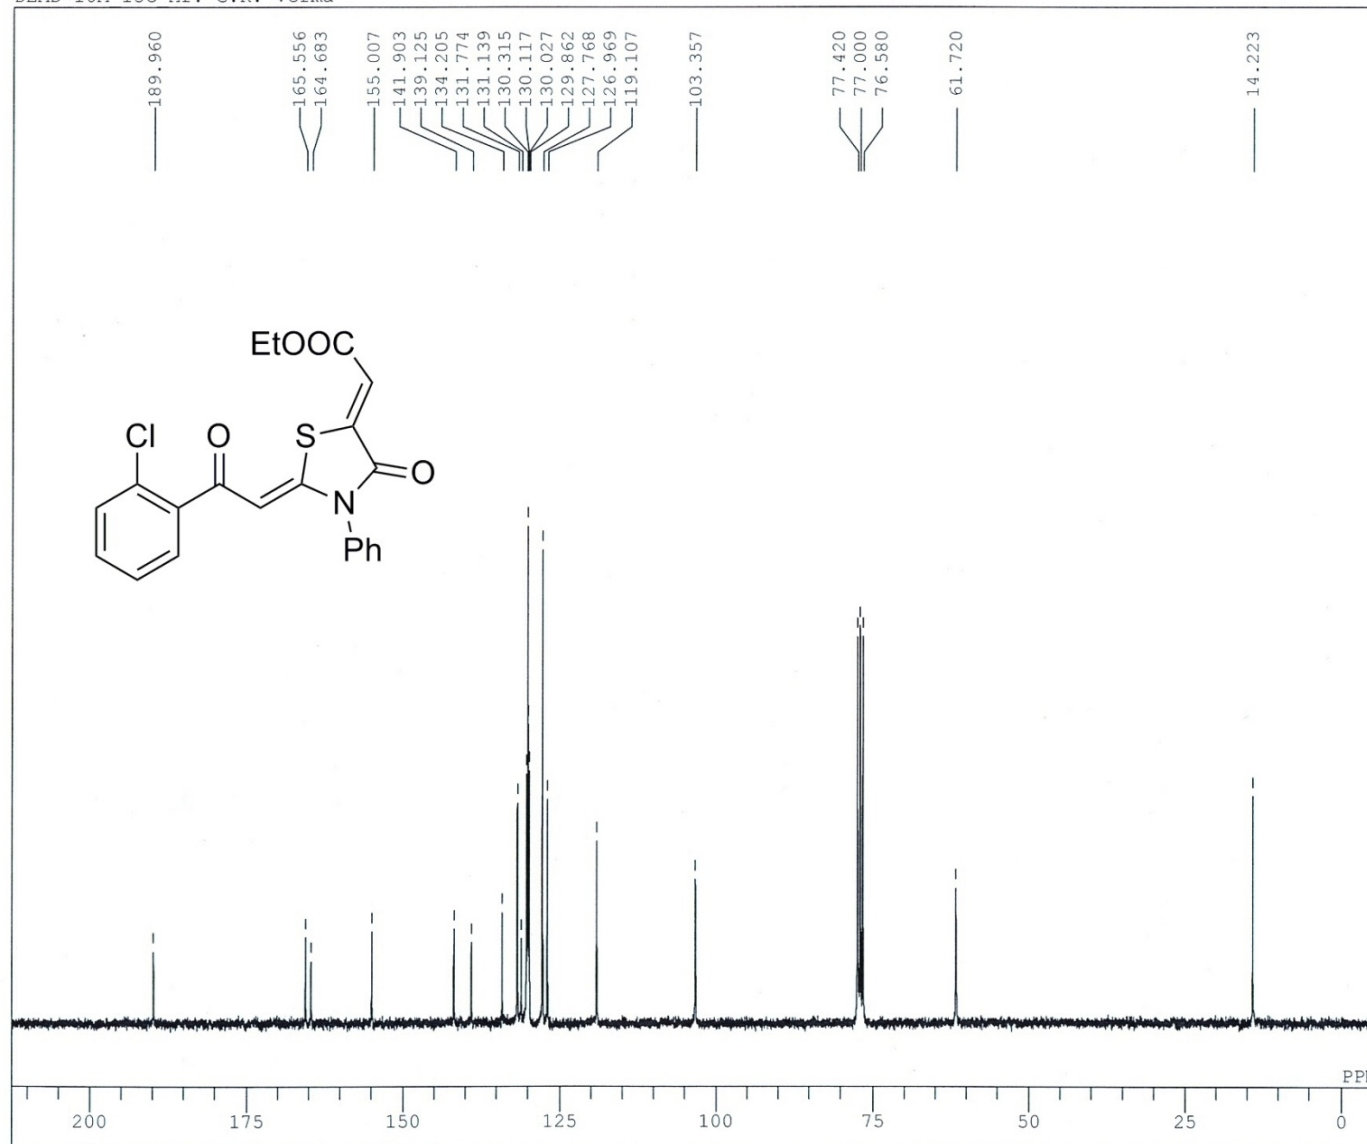

JEOL AL300 FTNMR  
CHEMISTRY DEPARTMENT  
Banaras Hindu University,  
VARANASI-221005

Operator : Nagendra Kumar  
Shishir Singh

DFILE C:\Girijesh K. Verma\DEAD-10A\_13C.als  
COMNT DEAD-10A\_13C Mr. G.K. Verma  
DATIM Fri Jul 05 07:05:35 2005  
OBNUC 13C  
EXMOD BCM  
OBFRQ 75.45 MHz  
OBSET 124.00 KHz  
OBFIN 1840.0 Hz  
POINT 32768  
FREQU 20408.1 Hz  
SCANS 2500  
ACQTM 1.606 sec  
PD 1.394 sec  
PW1 5.9 us  
IRNUC 1H  
CTEMP 22.1 c  
SLVNT CDCL3  
EXREF 77.00 ppm  
BF 1.20 Hz  
RGAIN 24

# <sup>1</sup>H & <sup>13</sup>C-NMR Spectra of 3ea:

C:\WINNMR98\COMMON\DEFAULT.ALS  
DEAD-11G 1H Mr. G. K. Verma

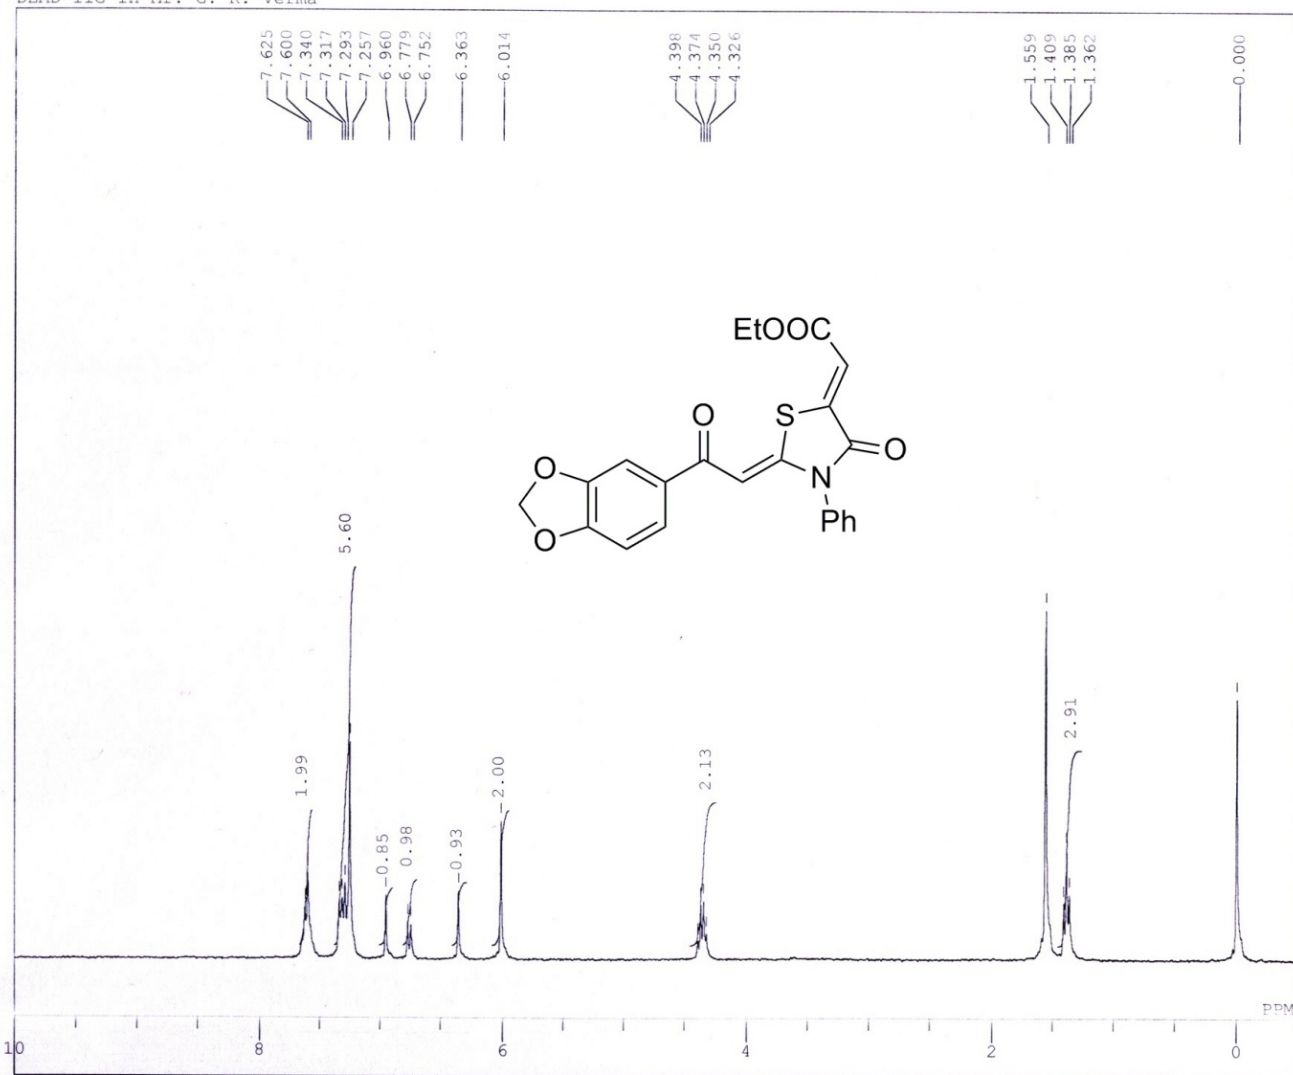

JEOL AL300 FTNMR  
CHEMISTRY DEPARTMENT  
Banaras Hindu University,  
VARANASI-221005

Operator : Nagendra Kumar  
Shishir Singh

DFILE C:\WINNMR98\COMMON\DEI  
COMNT DEAD-11G\_1H\_Mr. G. K. V  
DATIM Tue Nov 26 17:35:29 20:  
OBNUC 1H  
EXMOD NON  
OBFRQ 300.40 MHz  
OBSET 130.00 KHz  
OBFIN 1150.0 Hz  
POINT 32768  
FREQU 9505.7 Hz  
SCANS 7  
ACQTM 3.447 sec  
PD 1.547 sec  
PW1 5.2 us  
IRNUC 1H  
CTEMP 21.7 c  
SLVNT CDCL3  
EXREF 0.00 ppm  
BF 1.22 Hz  
RGAIN 24

C:\WINNMR98\Data\DEAD-11A\_13C1BCM\_E4.als  
DEAD-11A 13C Mr.G.K.Verma

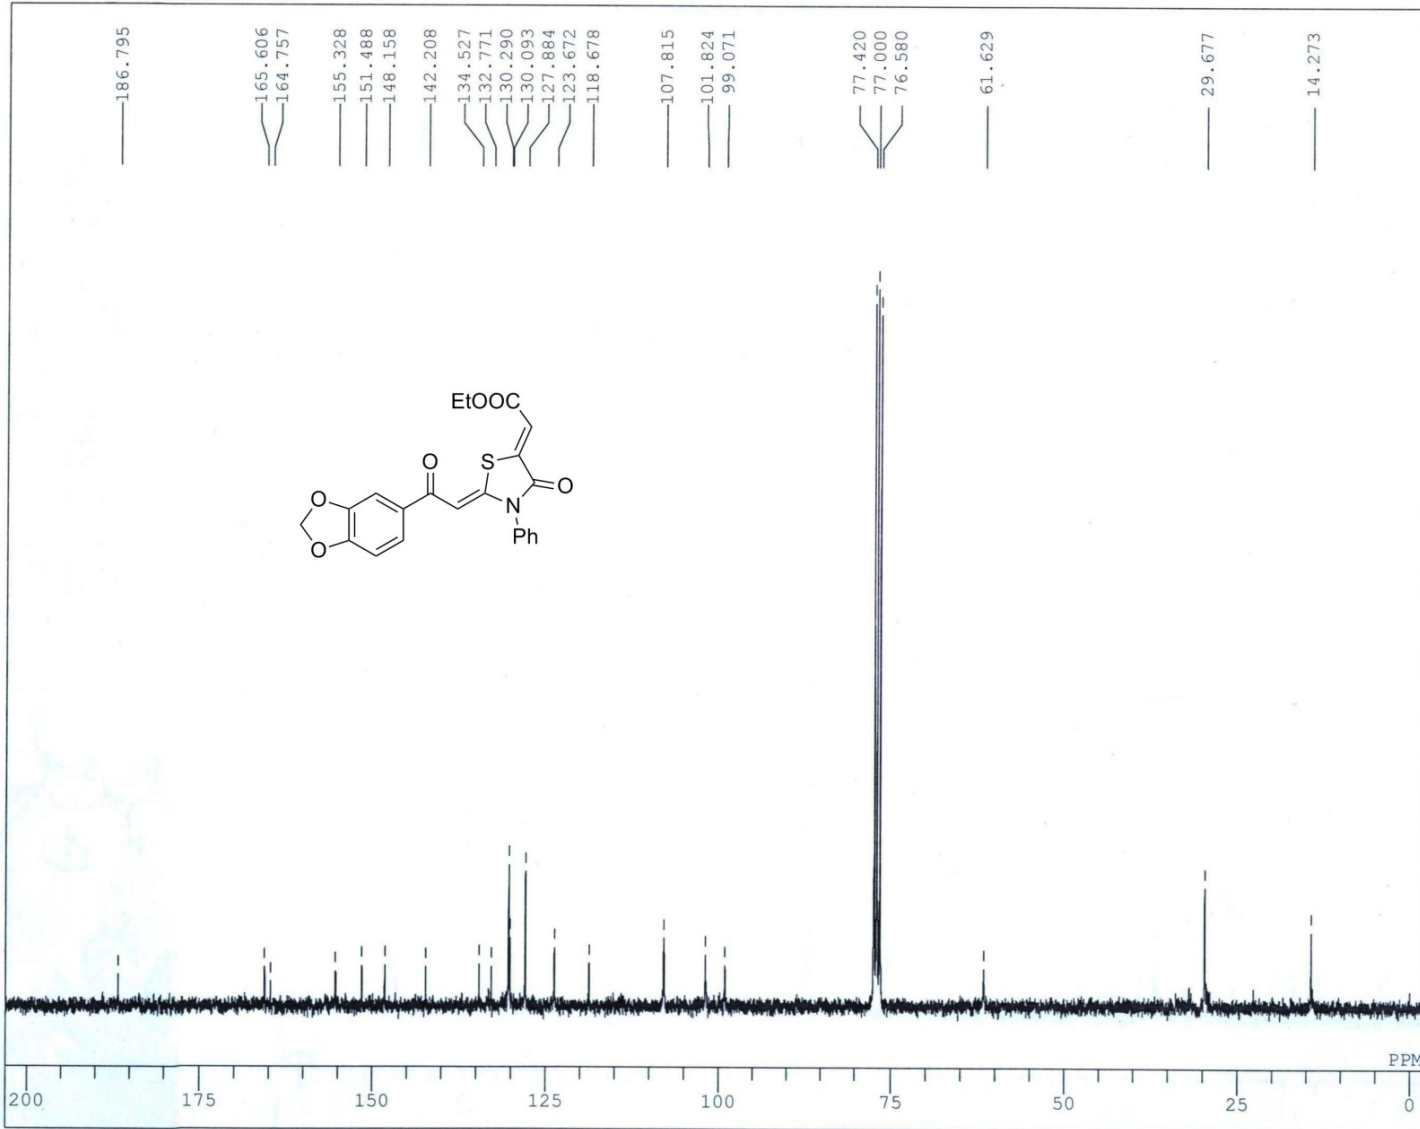

JEOL AL300 FTNMR  
CHEMISTRY DEPARTMENT  
Banaras Hindu University  
VARANASI-221005

Operator : Nagendra Kuma  
Shishir Singh

DFILE C:\WINNMR98\Data\  
COMNT DEAD-11A 13C Mr.G  
DATIM Tue Jul 09 02:47:  
OBNUC 13C  
EXMOD BCM  
OBFRQ 75.45 MHz  
OBSET 124.00 KHz  
OBFIN 1840.0 Hz  
POINT 32768  
FREQU 20408.1 Hz  
SCANS 2000  
ACQTM 1.606 sec  
PD 1.394 sec  
PW1 5.9 us  
IRNUC 1H  
CTEMP 21.7 c  
SLVNT CDCL3  
EXREF 77.00 ppm  
BF 1.20 Hz  
RGAIN 24

# <sup>1</sup>H & <sup>13</sup>C-NMR Spectra of 3fa:

C:\Girijesh K. Verma\DED-7A\_1H\_.als  
DED-7A 1H Mr.G.K.Verma

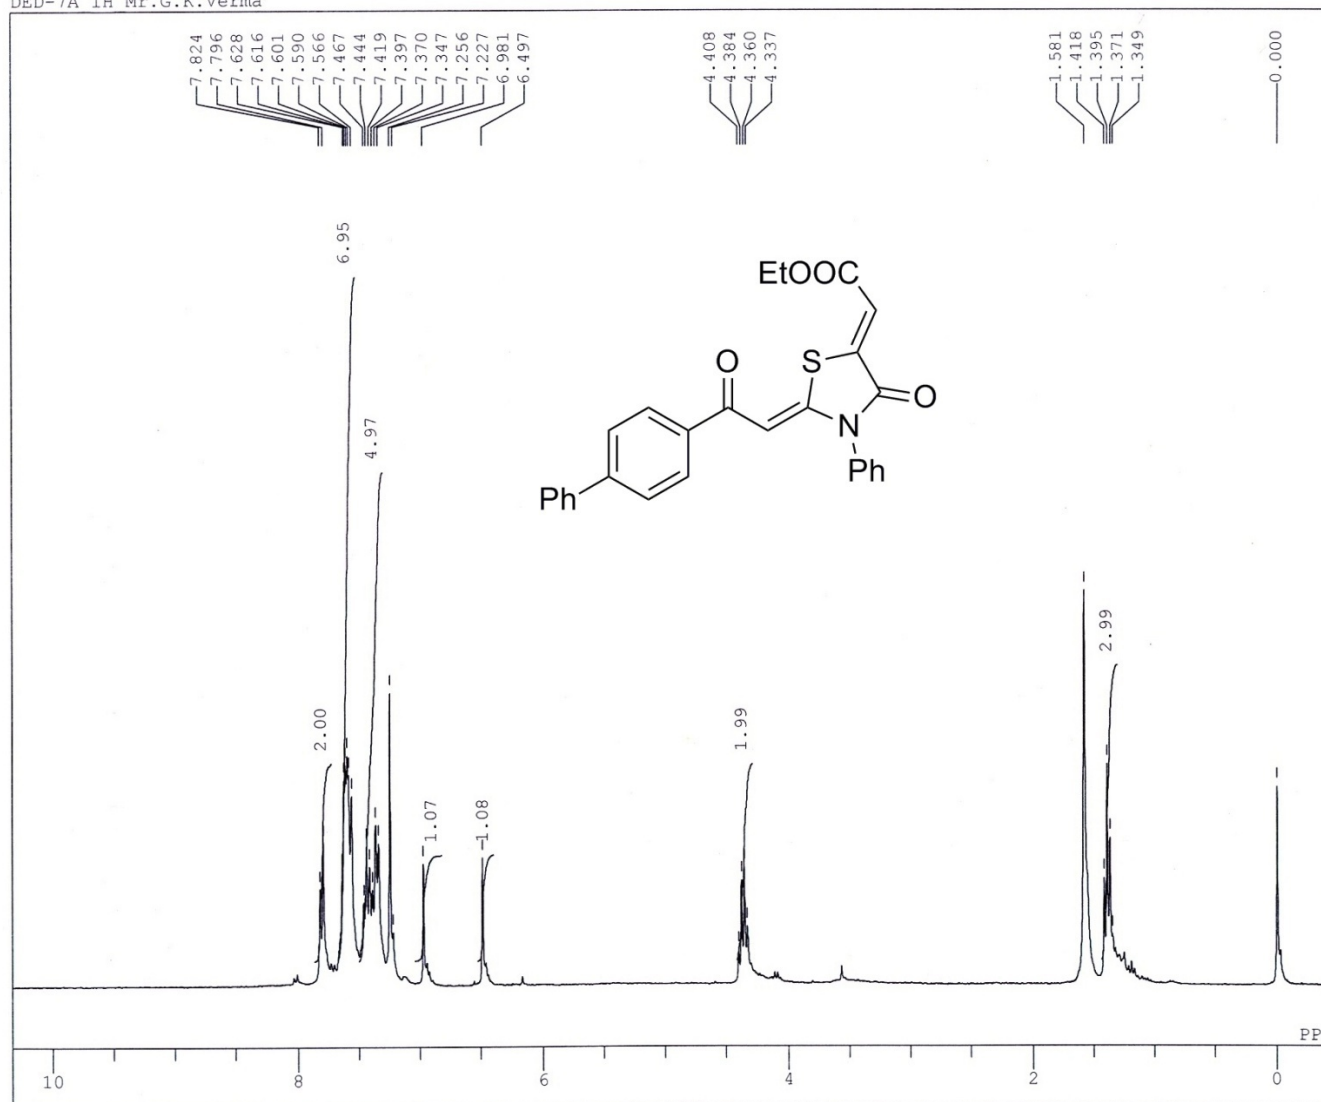

JEOL AL300 FTNMR  
CHEMISTRY DEPARTMENT  
Banaras Hindu University,  
VARANASI-221005

Operator : Nagendra Kumar  
Shishir Singh

DFILE C:\Girijesh K. Verma\DI  
COMNT DED-7A\_1H Mr.G.K.Verma  
DATIM Fri Jun 28 11:45:41 20:  
OBNUC 1H  
EXMOD NON  
OBFRQ 300.40 MHz  
OBSET 130.00 KHz  
OBFIN 1150.0 Hz  
POINT 32768  
FREQU 9505.7 Hz  
SCANS 26  
ACQTM 3.447 sec  
PD 1.547 sec  
PW1 5.2 us  
IRNUC 1H  
CTEMP 24.7 c  
SLVNT CDCL3  
EXREF 0.00 ppm  
BF 1.20 Hz  
RGAIN 21

C:\Girijesh K. Verma\DEAD-7A\_13C.als  
DEAD-7A 13C Mr.G.K.Verma

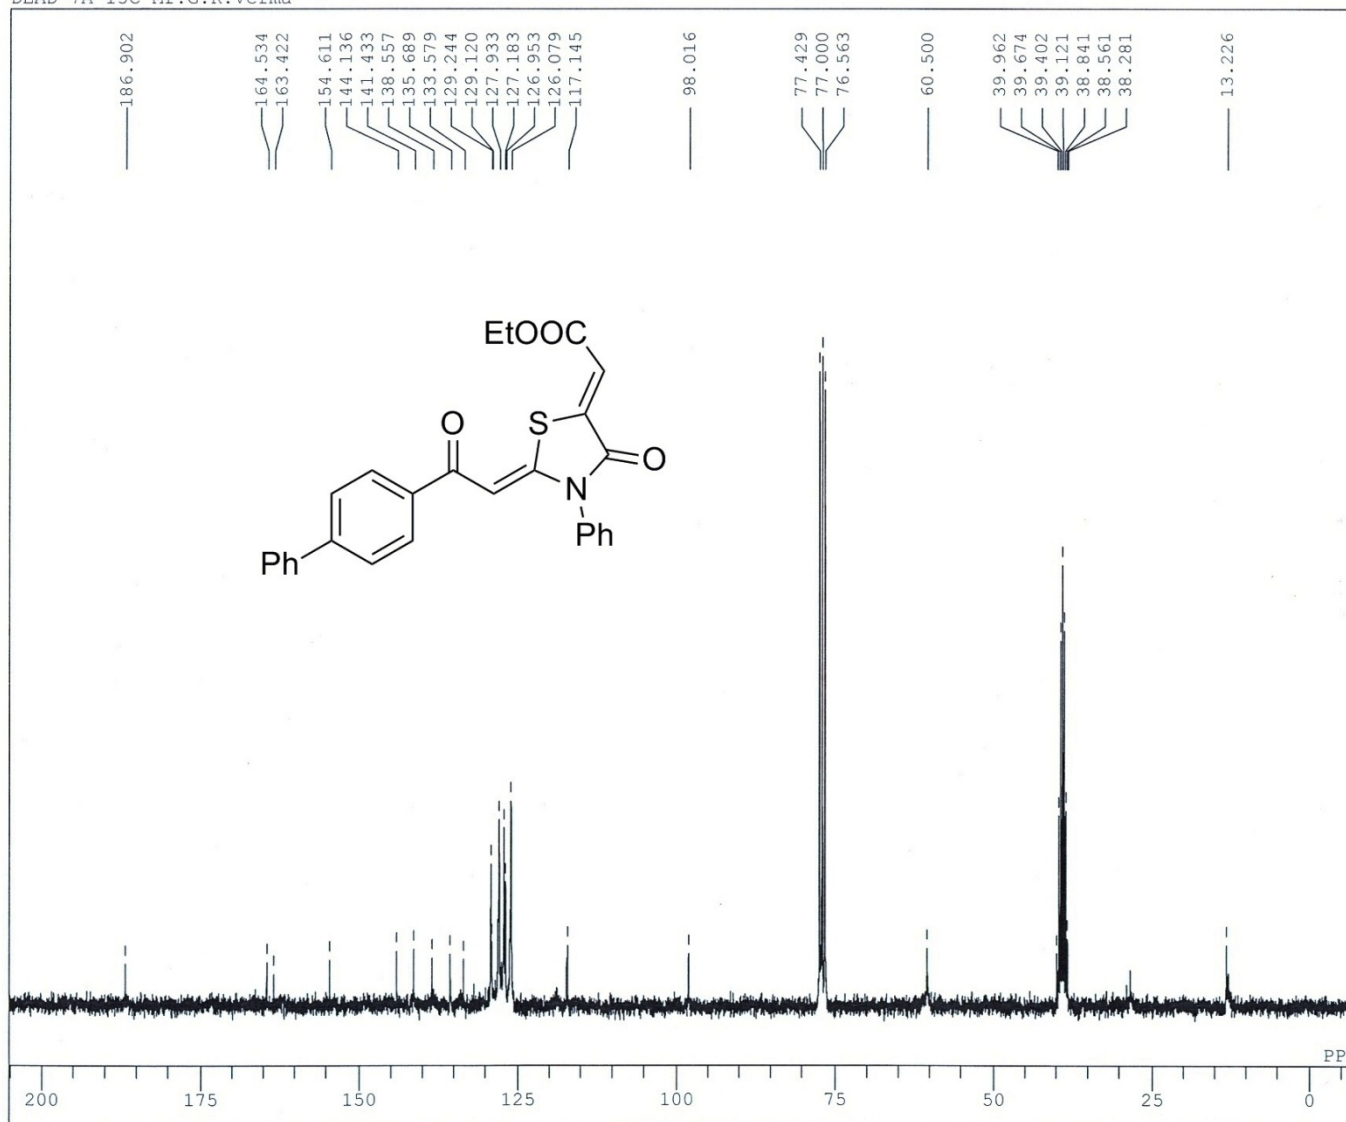

JEOL AL300 FTNMR  
CHEMISTRY DEPARTMENT  
Banaras Hindu University,  
VARANASI-221005

Operator : Nagendra Kumar  
Shishir Singh

DFILE C:\Girijesh K. Verma\DI  
COMNT DEAD-7A\_13C Mr.G.K.Verr  
DATIM Wed Jul 03 01:24:56 20:  
OBNUC 13C  
EXMOD BCM  
OBFRQ 75.45 MHz  
OBSET 124.00 KHz  
OBFIN 1840.0 Hz  
POINT 32768  
FREQU 20408.1 Hz  
SCANS 2000  
ACQTM 1.606 sec  
PD 1.394 sec  
PW1 5.9 us  
IRNUC 1H  
CTEMP 50.3 c  
SLVNT CDCL3  
EXREF 77.00 ppm  
BF 1.22 Hz  
RGAIN 23

# <sup>1</sup>H & <sup>13</sup>C-NMR Spectra of 3ga:

C:\Girijesh K. Verma\DEAD-4E\_1H.als  
DEAD-4E 1H Mr. Girijesh

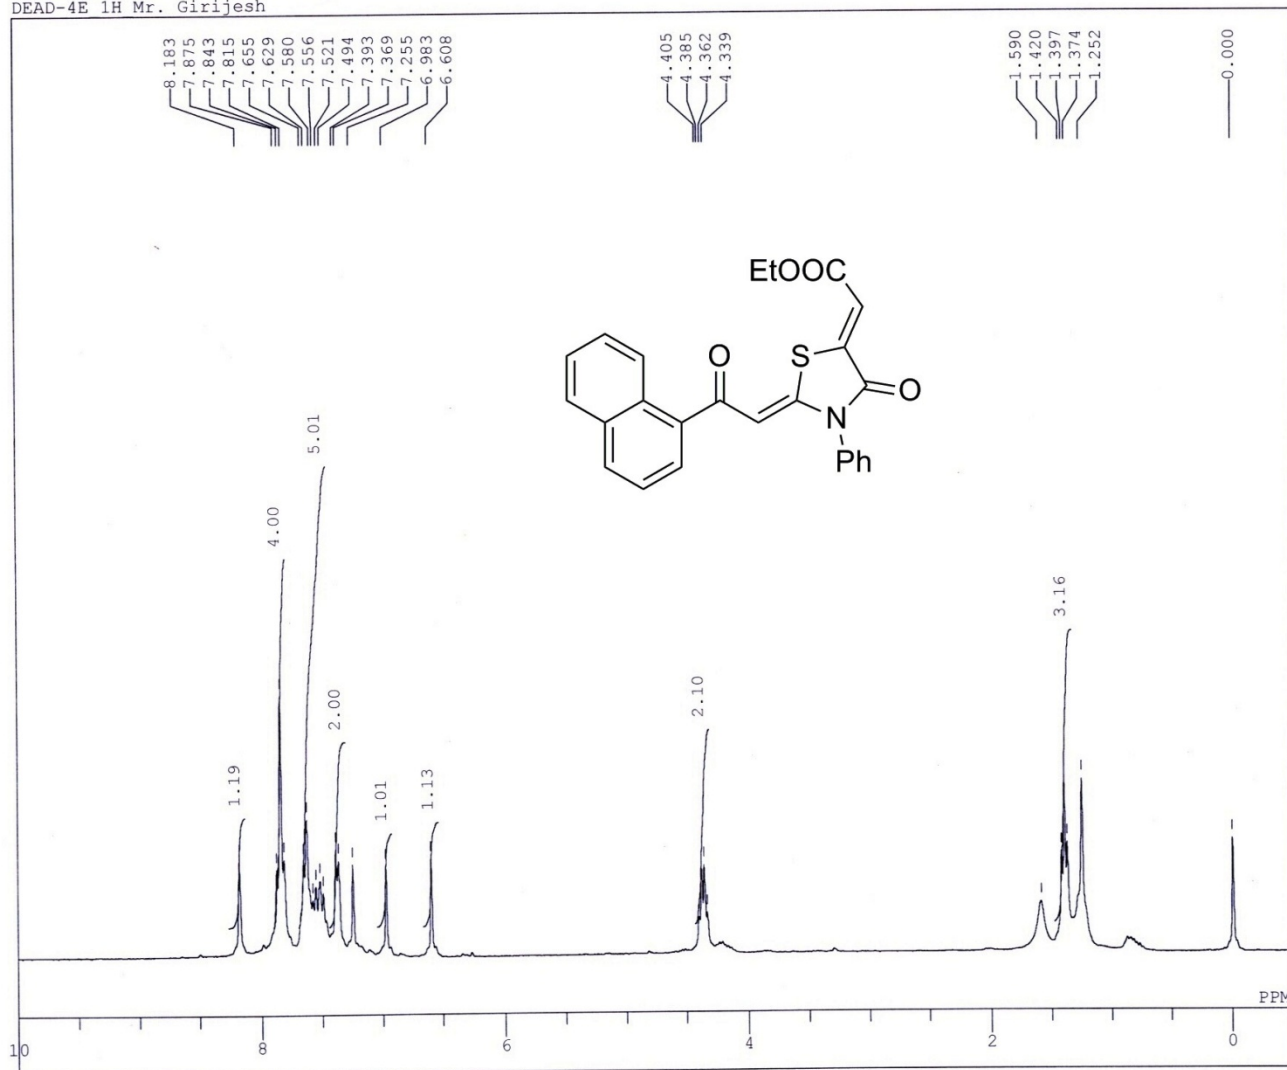

JEOL AL300 FTNMR  
CHEMISTRY DEPARTMENT  
Banaras Hindu University,  
VARANASI-221005

Operator : Nagendra Kumar  
Shishir Singh

DFILE C:\Girijesh K. Verma\DI  
COMNT DEAD-4E\_1H Mr. Girijesh  
DATIM Wed Nov 27 15:47:51 20:  
OBNUC 1H  
EXMOD NON  
OBFRQ 300.40 MHz  
OBSET 130.00 KHz  
OBFIN 1150.0 Hz  
POINT 32768  
FREQU 9505.7 Hz  
SCANS 17  
ACQTM 3.447 sec  
PD 1.547 sec  
PW1 5.2 us  
IRNUC 1H  
CTEMP 20.8 c  
SLVNT CDCL3  
EXREF 0.00 ppm  
BF 1.20 Hz  
RGAIN 20

C:\Girijesh K. Verma\DEAD-4A\_13C.als  
DEAD-4A 13C Mr. G.K. Verma

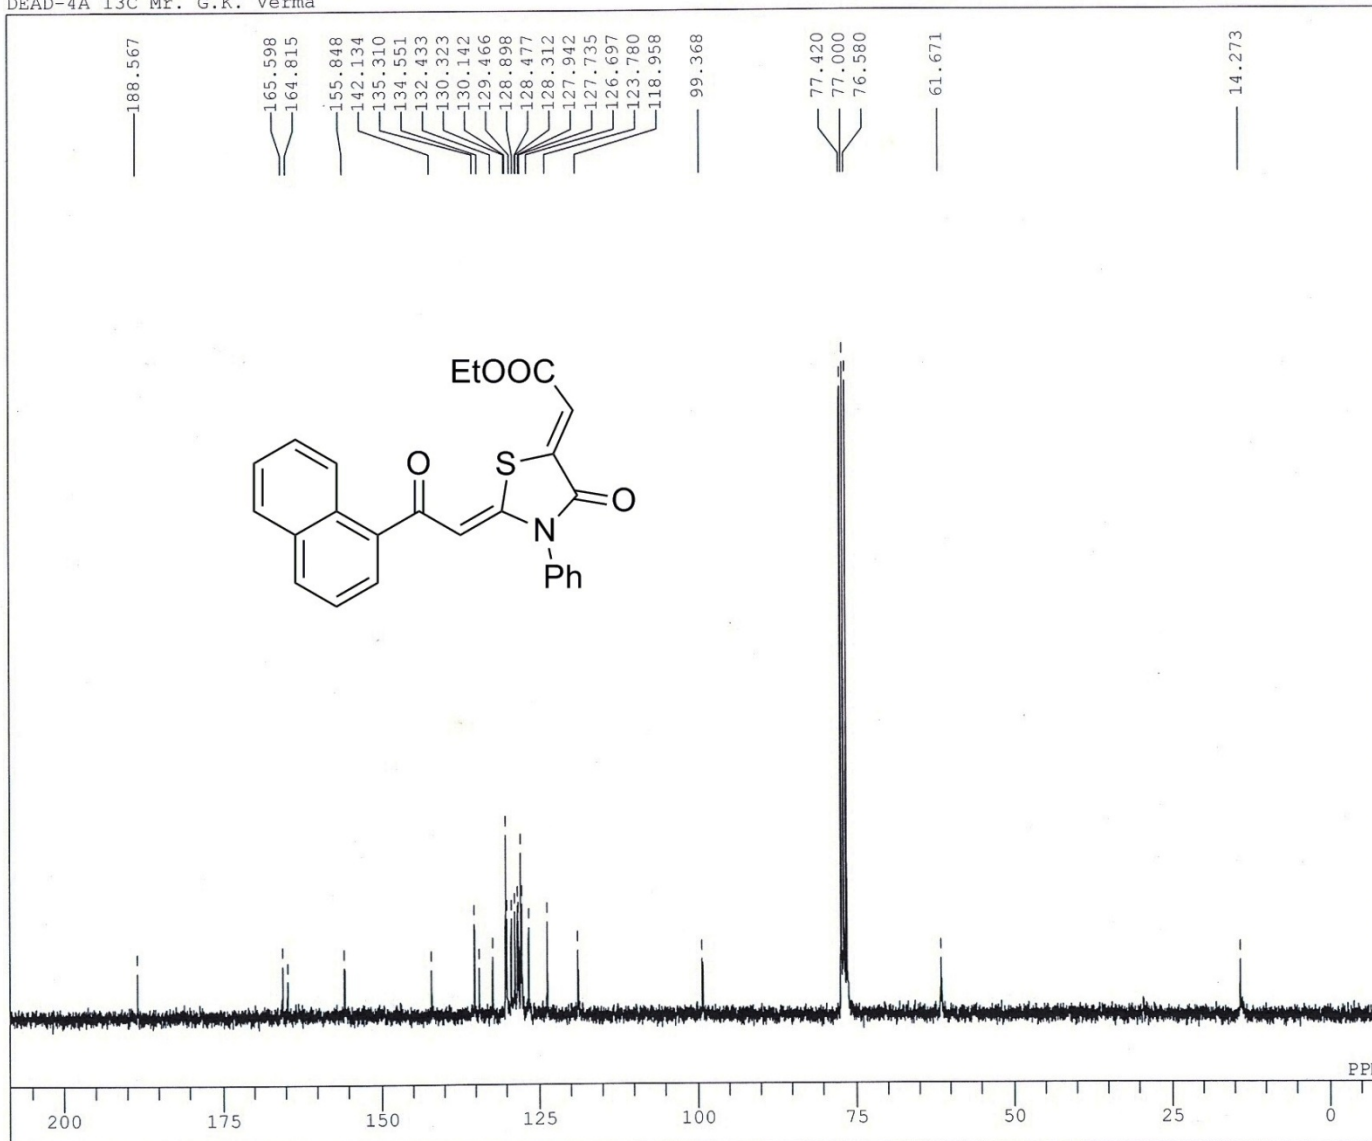

JEOL AL300 FTNMR  
CHEMISTRY DEPARTMENT  
Banaras Hindu University,  
VARANASI-221005

Operator : Nagendra Kumar  
Shishir Singh

DFILE C:\Girijesh K. Verma\DE  
COMNT DEAD-4A\_13C Mr. G.K. Ve  
DATIM Thu Jun 27 21:02:18 20:  
OBNUC 13C  
EXMOD BCM  
OBFRQ 75.45 MHz  
OBSET 124.00 KHz  
OBFIN 1840.0 Hz  
POINT 32768  
FREQU 20408.1 Hz  
SCANS 2000  
ACQTM 1.606 sec  
PD 1.394 sec  
PWL 5.9 us  
IRNUC 1H  
CTEMP 24.1 c  
SLVNT CDCL3  
EXREF 77.00 ppm  
BF 1.20 Hz  
RGAIN 24



# <sup>1</sup>H & <sup>13</sup>C-NMR Spectra of 3ha:

C:\Girijesh K. Verma\DEAD-3D\_1H.als  
DEAD-3D\_1H Mr.G.K.Verma

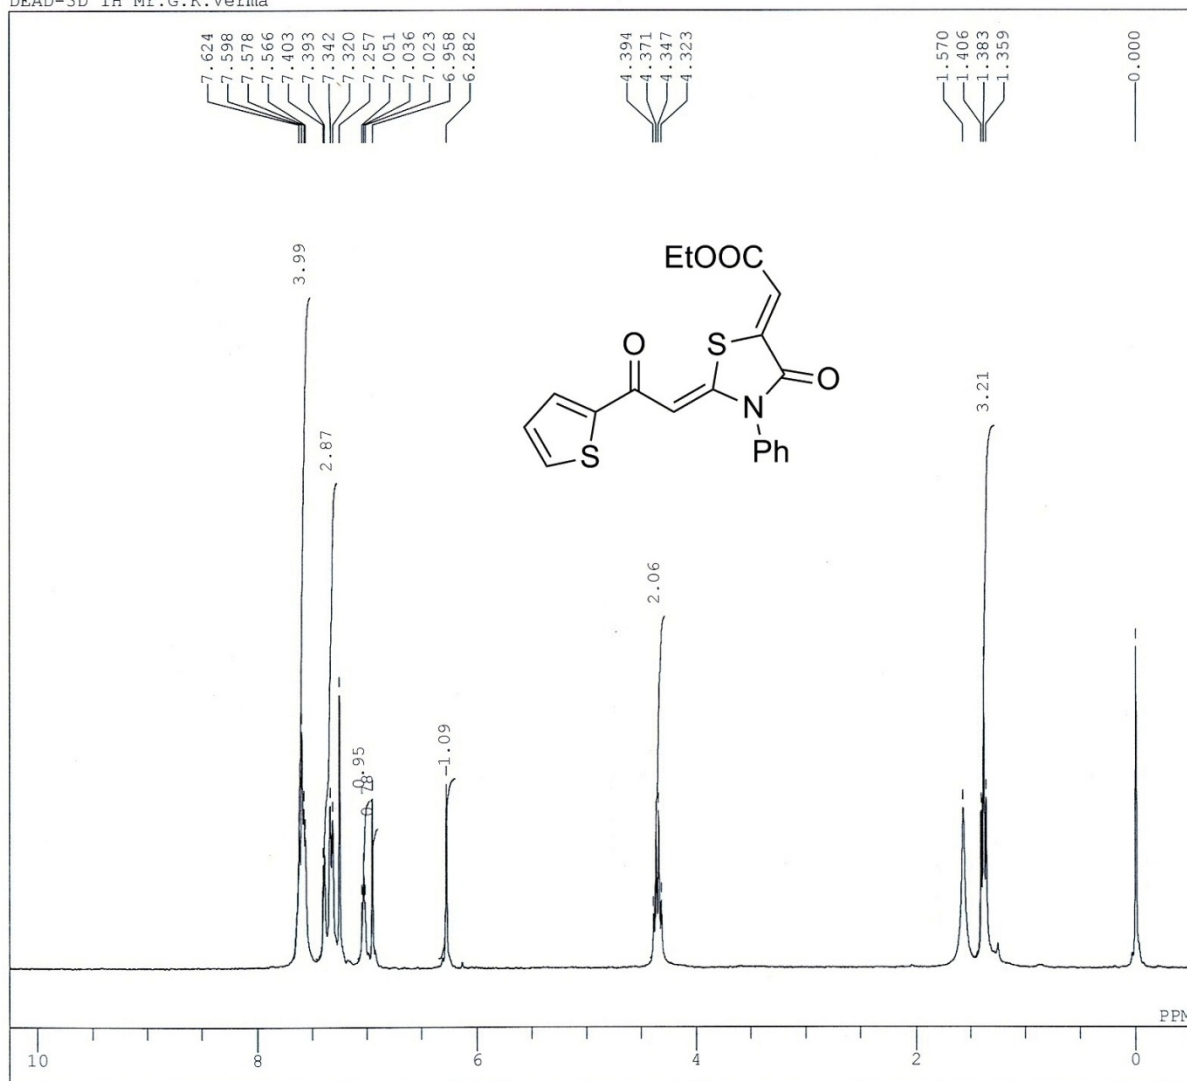

JEOL AL300 FTNMR  
CHEMISTRY DEPARTMENT  
Banaras Hindu University,  
VARANASI-221005

Operator : Nagendra Kumar  
Shishir Singh

DFILE C:\Girijesh K. Verma\DEAD-3D\_1H.a  
COMNT DEAD-3D\_1H\_Mr.G.K.Verma  
DATIM Mon Dec 02 16:21:04 2013  
OBNUC 1H  
EXMOD NON  
OBFRQ 300.40 MHz  
OBSET 130.00 KHz  
OBFIN 1150.0 Hz  
POINT 32768  
FREQU 9505.7 Hz  
SCANS 20  
ACQTM 3.447 sec  
PD 1.547 sec  
PW1 5.2 us  
IRNUC 1H  
CTEMP 23.9 c  
SLVNT CDCL3  
EXREF 0.00 ppm  
BF 1.20 Hz  
RGAIN 23

C:\Girijesh K. Verma\DEAD-3\_13C.als  
DEAD-3 13C Mr.G.K.Verma

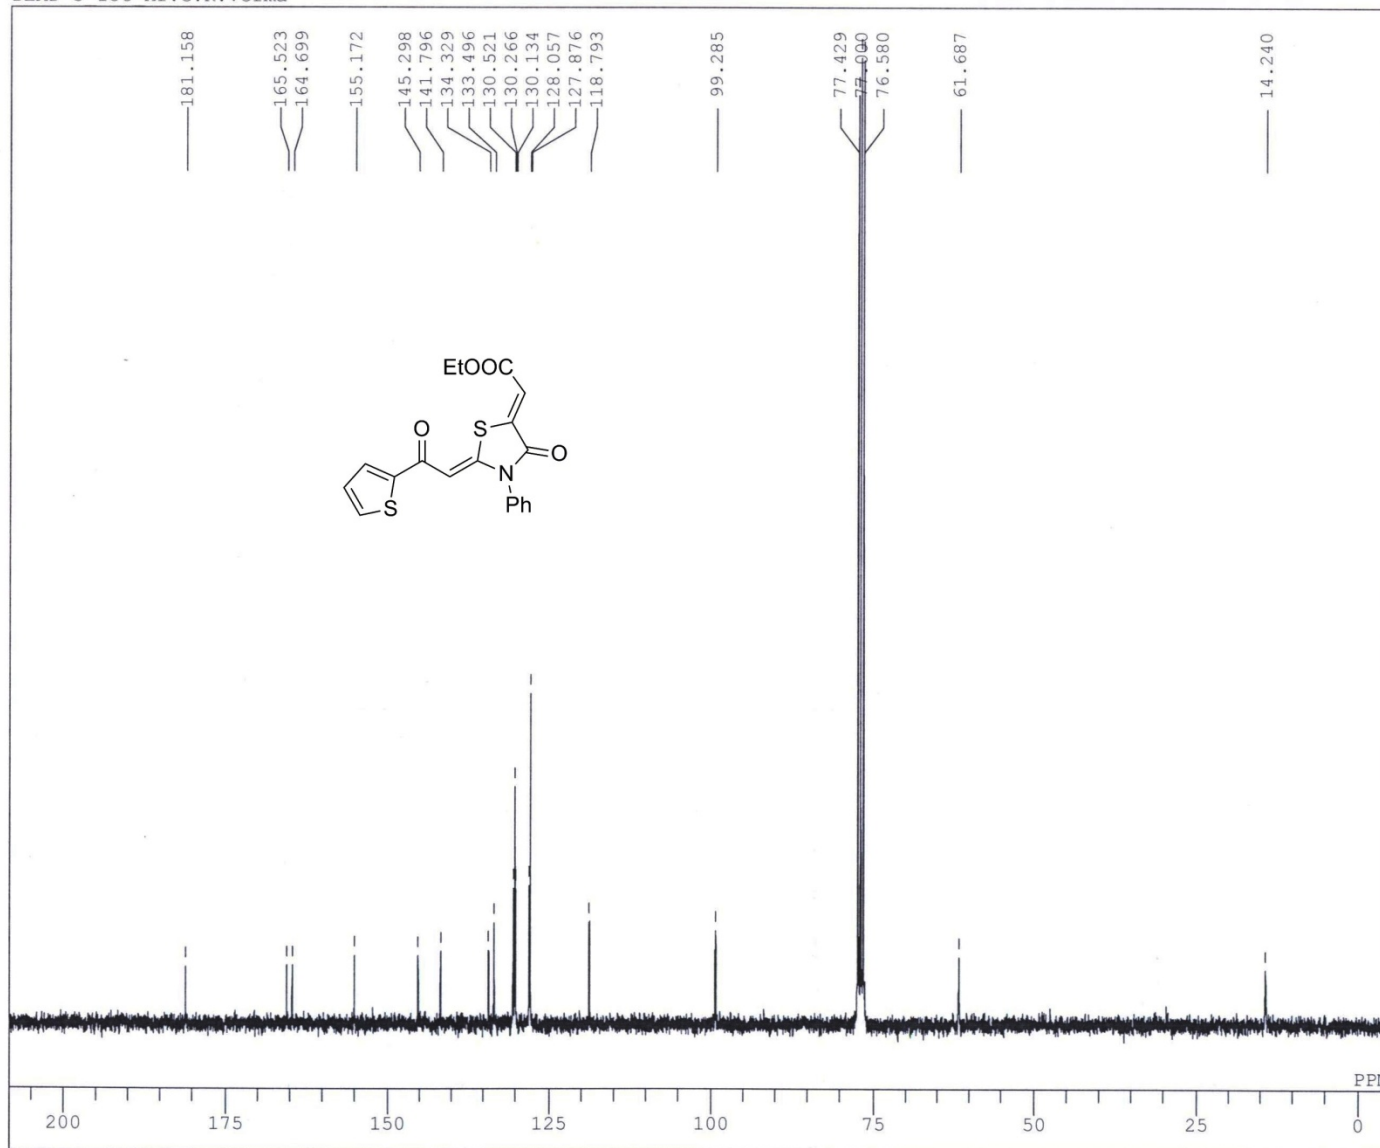

JEOL AL300 FTNMR  
CHEMISTRY DEPARTMENT  
Banaras Hindu University,  
VARANASI-221005

Operator : Nagendra Kumar  
Shishir Singh

DFILE C:\Girijesh K. Verma\DI  
COMNT DEAD-3\_13C\_Mr.G.K.Verma  
DATIM Sat Jun 01 07:58:46 20  
OBNUC 13C  
EXMOD BCM  
OBFRQ 75.45 MHz  
OBSET 124.00 KHz  
OBFIN 1840.0 Hz  
POINT 32768  
FREQU 20408.1 Hz  
SCANS 2000  
ACQTM 1.606 sec  
PD 1.394 sec  
PW1 5.9 us  
IRNUC 1H  
CTEMP 18.1 c  
SLVNT CDCL3  
EXREF 77.00 ppm  
BF 1.20 Hz  
RGAIN 22

# <sup>1</sup>H & <sup>13</sup>C-NMR Spectra of 3ia:

C:\WINNMR98\COMMON\\_DEFAULT.ALS  
DEAD-13C 1H Mr. Girijesh K. Verma

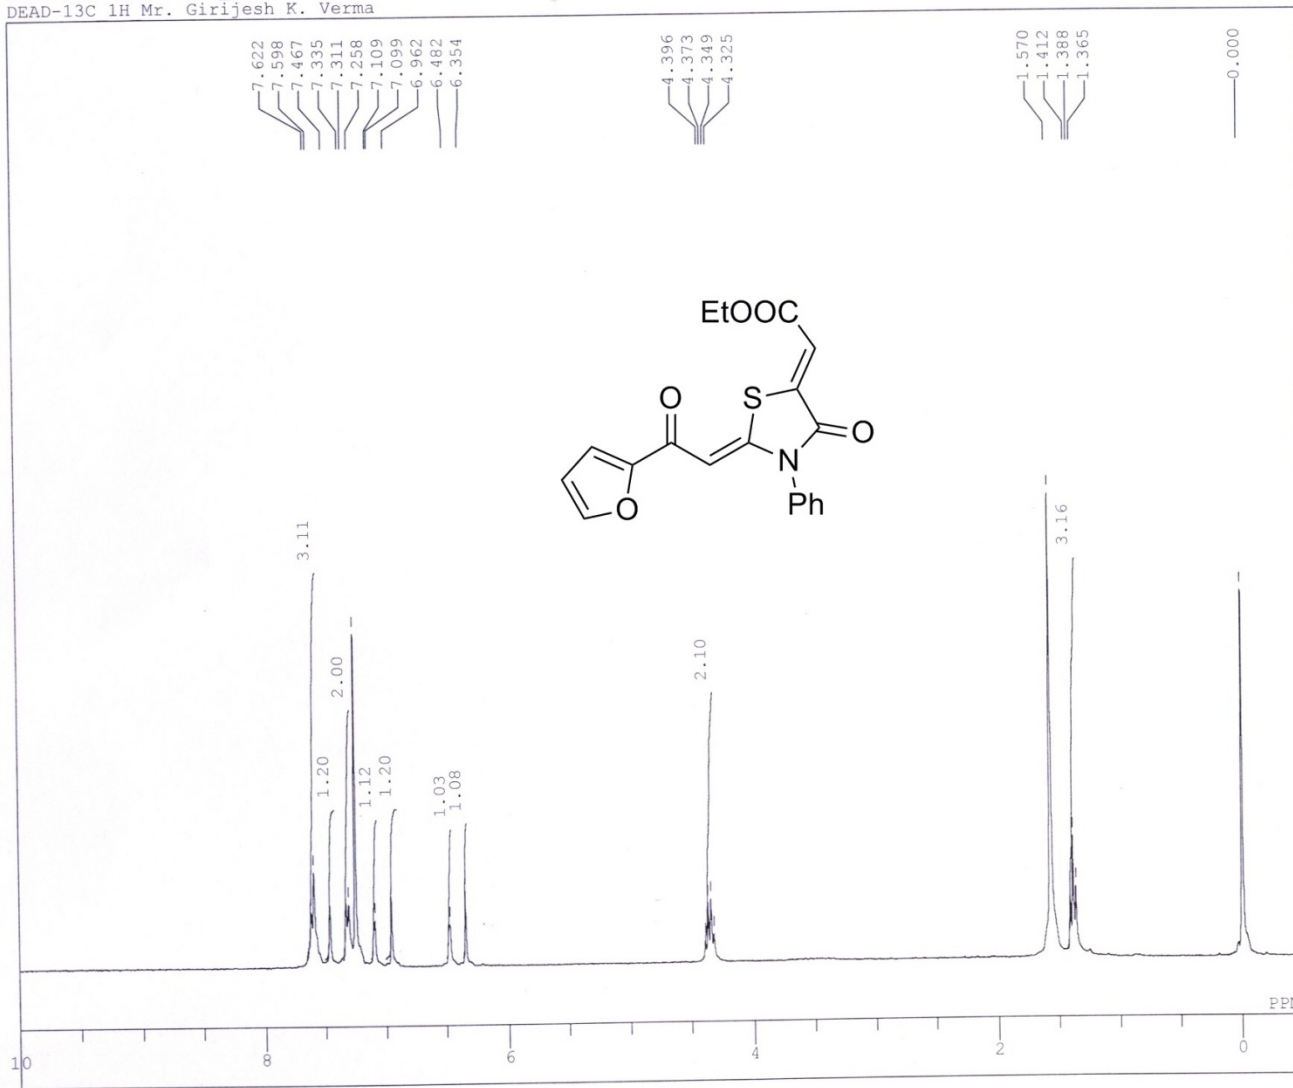

JEOL AL300 FTNMR  
CHEMISTRY DEPARTMENT  
Banaras Hindu University,  
VARANASI-221005

Operator : Nagendra Kumar  
Shishir Singh

DFILE C:\WINNMR98\COMMON\\_DEI  
COMNT DEAD-13C 1H Mr. Girije  
DATIM Thu Nov 28 12:15:29 20  
OBNUC 1H  
EXMOD NON  
OBFRQ 300.40 MHz  
OBSET 130.00 KHz  
OBFIN 1150.0 Hz  
POINT 32768  
FREQU 9505.7 Hz  
SCANS 64  
ACQTM 3.447 sec  
PD 1.547 sec  
PW1 5.2 us  
IRNUC 1H  
CTEMP 18.9 c  
SLVNT CDCL3  
EXREF 0.00 ppm  
BF 1.20 Hz  
RGAIN 24

C:\Girijesh K. Verma\DEAD-13A\_13C.als  
DEAD-13A 13C Mr. G.K. Verma

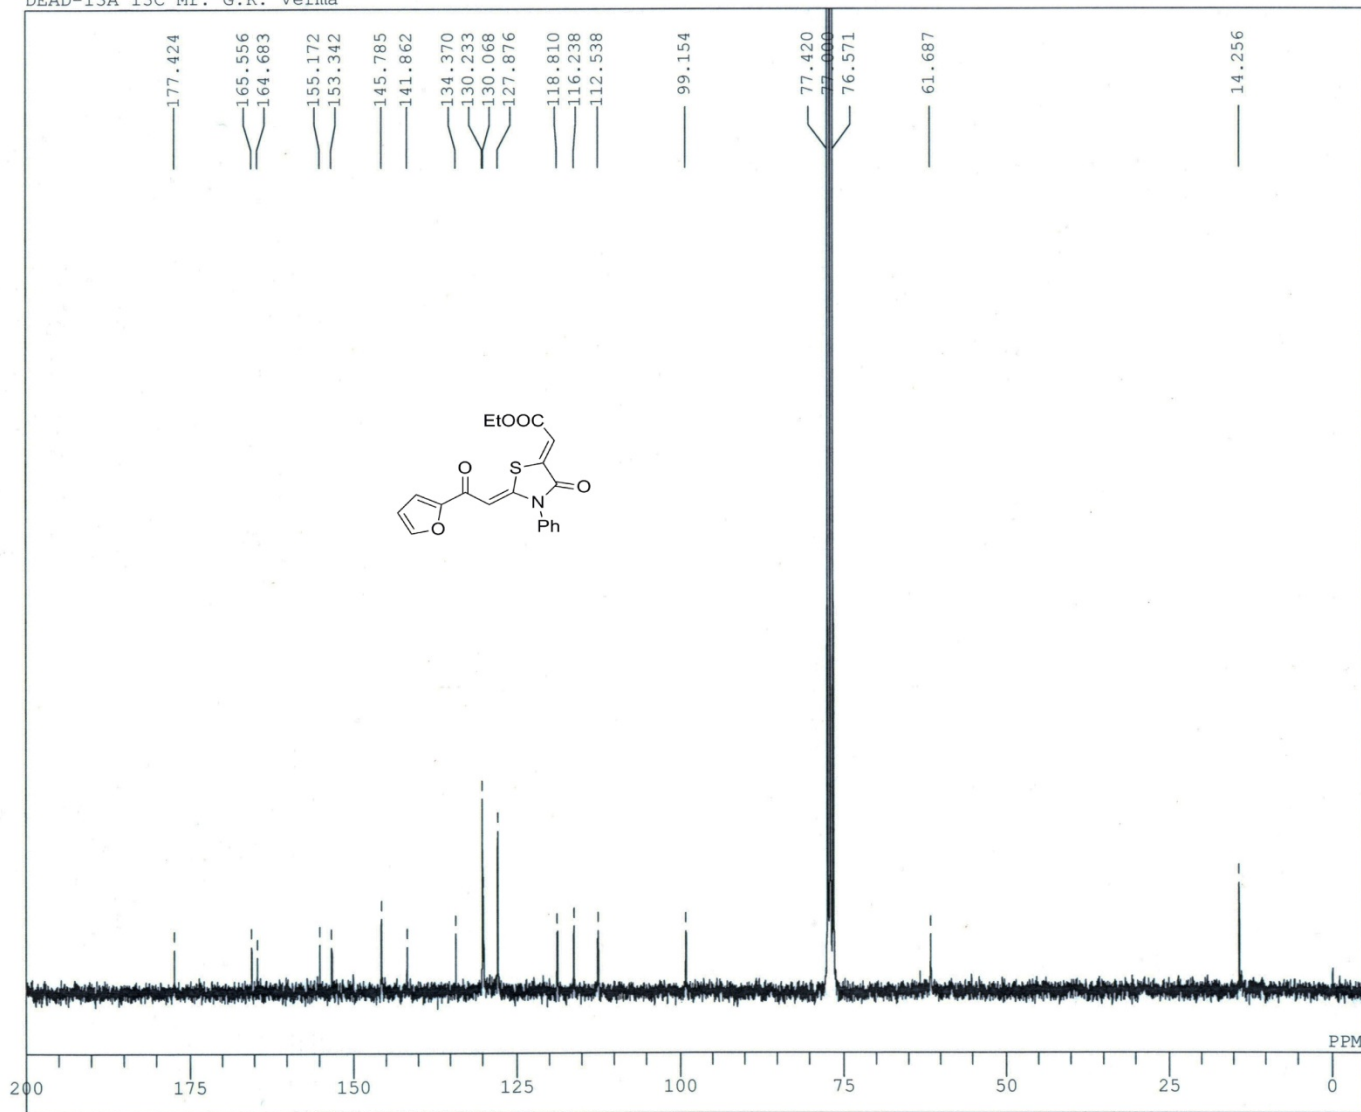

JEOL AL300 FTNMR  
CHEMISTRY DEPARTMENT  
Banaras Hindu University,  
VARANASI-221005

Operator : Nagendra Kumar  
Shishir Singh

DFILE C:\Girijesh K. Verma\DI  
COMNT DEAD-13A\_13C\_Mr. G.K. \\  
DATIM Wed Jul 10 02:57:01 20:  
OBNUC 13C  
EXMOD BCM  
OBFRQ 75.45 MHz  
OBSET 124.00 KHz  
OBFIN 1840.0 Hz  
POINT 32768  
FREQU 20408.1 Hz  
SCANS 3000  
ACQTM 1.606 sec  
PD 1.394 sec  
PW1 5.9 us  
IRNUC 1H  
CTEMP 22.9 c  
SLVNT CDCL3  
EXREF 77.00 ppm  
BF 1.20 Hz  
RGAIN 24

# <sup>1</sup>H & <sup>13</sup>C-NMR Spectra of 3ja:

C:\Girijesh K. Verma\DEAD-12C 1H.als  
DEAD-12C 1H Mr. Girijesh K. Verma

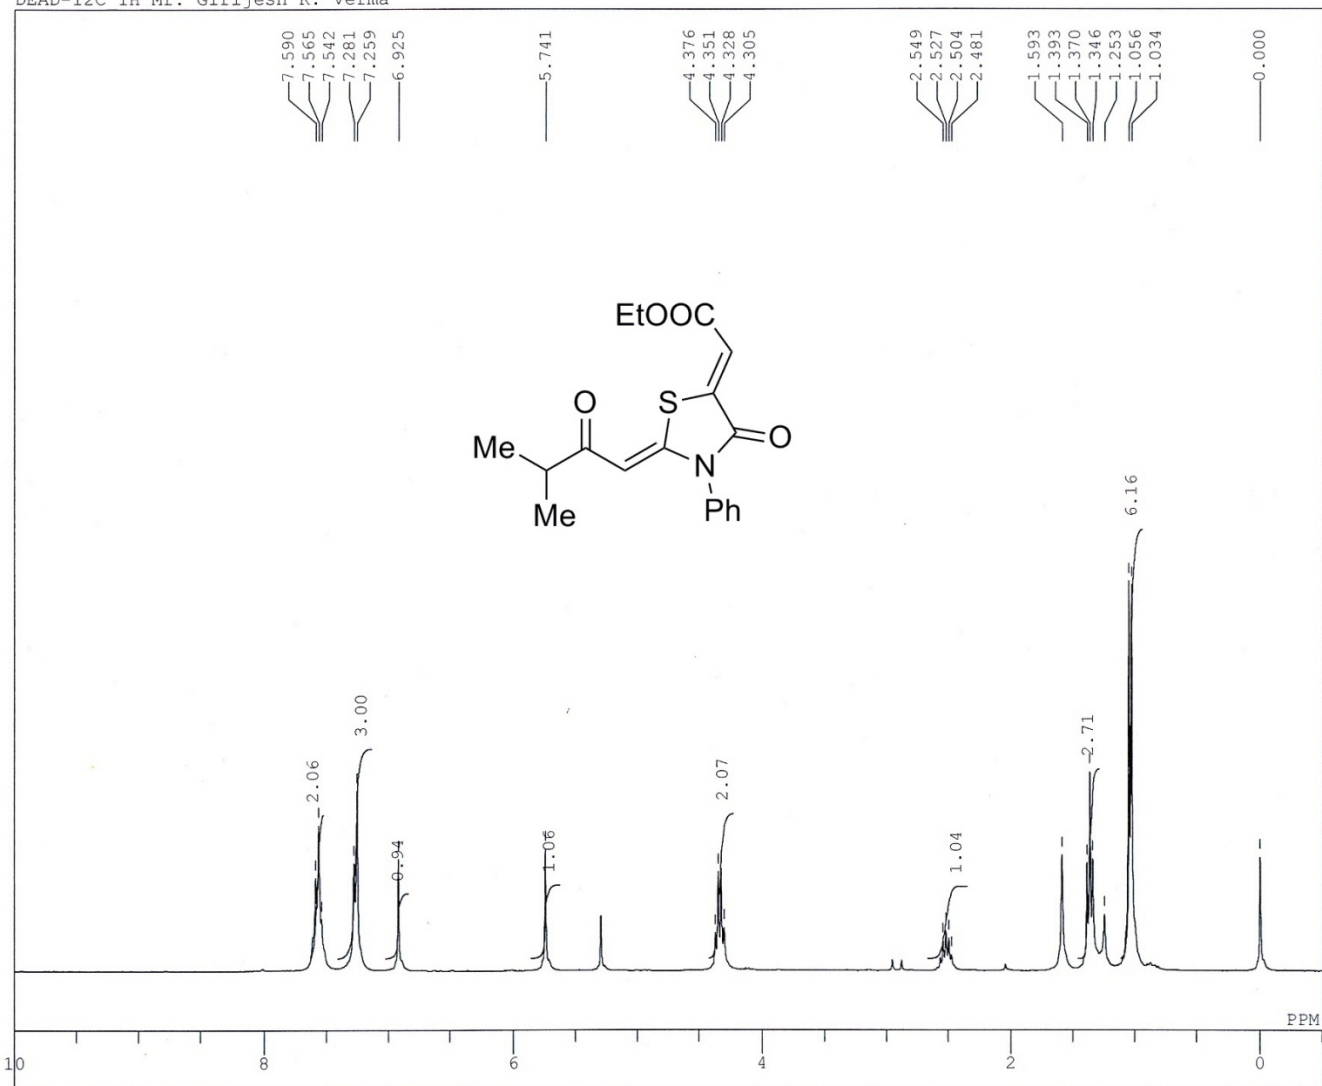

JEOL AL300 FTNMR  
CHEMISTRY DEPARTMENT  
Banaras Hindu University,  
VARANASI-221005

Operator : Nagendra Kumar  
Shishir Singh

DFILE C:\Girijesh K. Verma\DEAD-12C 1H Mr. Girijesh K. Verma  
COMNT DEAD-12C 1H Mr. Girijesh K. Verma  
DATIM Thu Nov 28 12:04:30 2011  
OBNUC 1H  
EXMOD NON  
OBFRQ 300.40 MHz  
OBSET 130.00 KHz  
OBFIN 1150.0 Hz  
POINT 32768  
FREQU 9505.7 Hz  
SCANS 118  
ACQTM 3.447 sec  
PD 1.547 sec  
PW1 5.2 us  
IRNUC 1H  
CTEMP 18.8 c  
SLVNT CDCL3  
EXREF 0.00 ppm  
BF 1.20 Hz  
RGAIN 20

C:\Girijesh K. Verma\DEAD-12A\_13C.als  
DEAD-12A 13C Mr. G.K. Verma

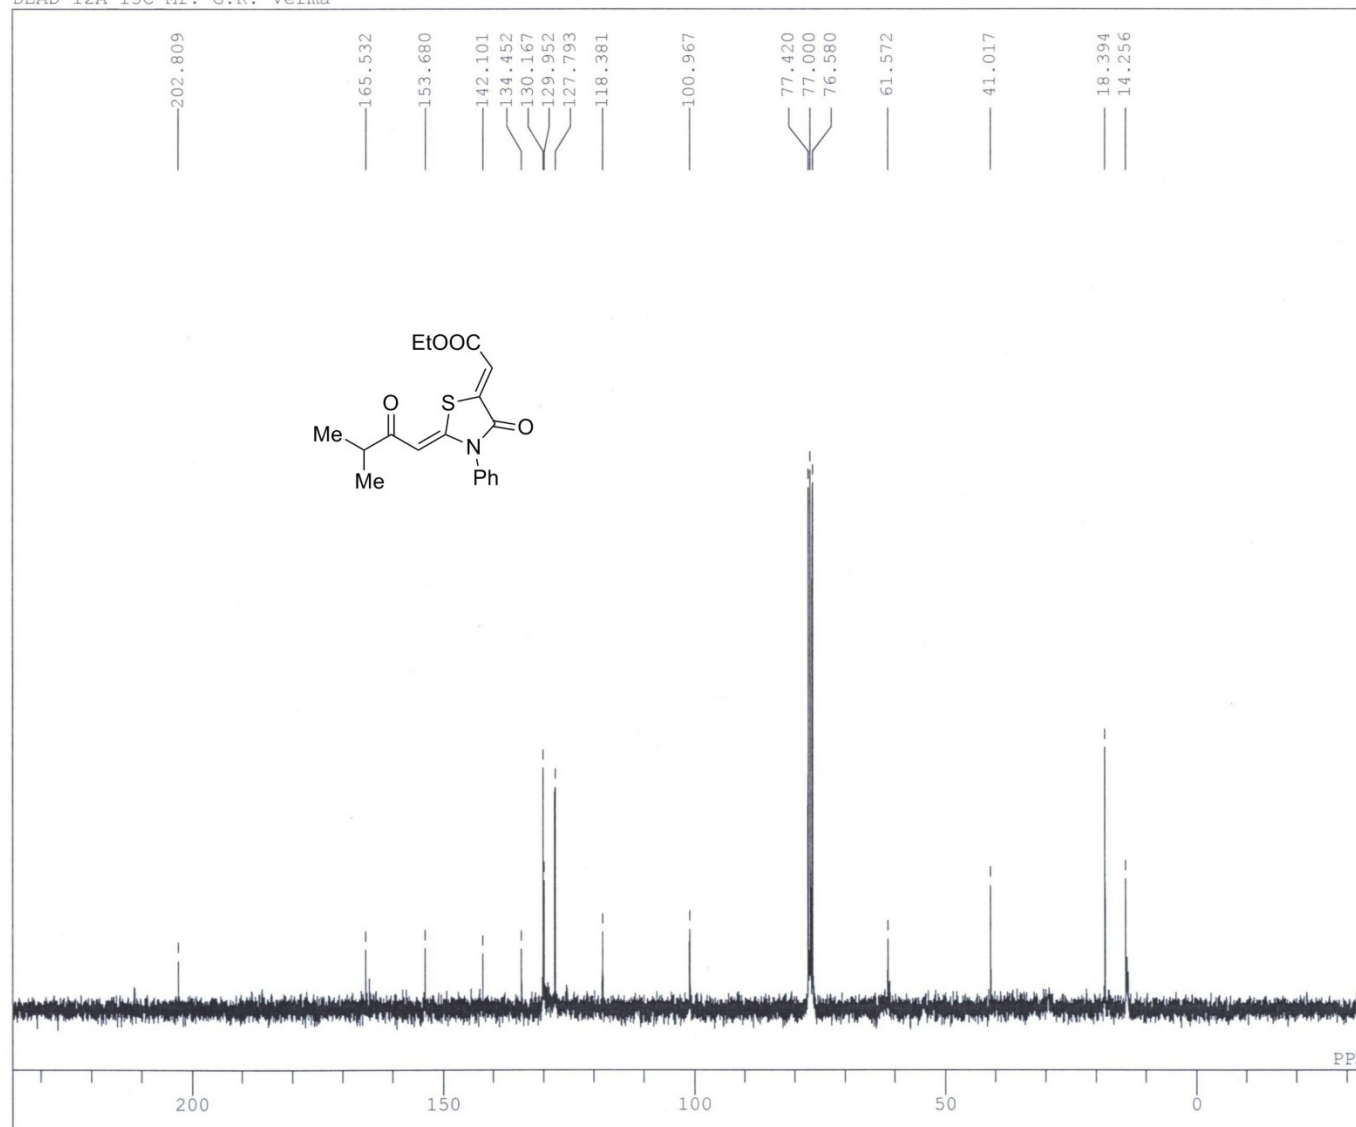

JEOL AL300 FTNMR  
CHEMISTRY DEPARTMENT  
Banaras Hindu University,  
VARANASI-221005

Operator : Nagendra Kumar  
Shishir Singh

DFILE C:\Girijesh K. Verma\DI  
COMNT DEAD-12A\_13C Mr. G.K. \\  
DATIM Mon Jul 08 15:57:25 20:  
OBNUC 13C  
EXMOD BCM  
OBFRQ 75.45 MHz  
OBSET 124.00 KHz  
OBFIN 1840.0 Hz  
POINT 32768  
FREQU 20408.1 Hz  
SCANS 409  
ACQTM 1.606 sec  
PD 1.394 sec  
PW1 5.9 us  
IRNUC 1H  
CTEMP 23.9 c  
SLVNT CDCL3  
EXREF 77.00 ppm  
BF 1.20 Hz  
RGAIN 23

# <sup>1</sup>H & <sup>13</sup>C-NMR Spectra of 3ka:

C:\Girijesh K. Verma\DEAD-9B\_1H.als  
DEAD-9B 1H Mr.G.K.Verma

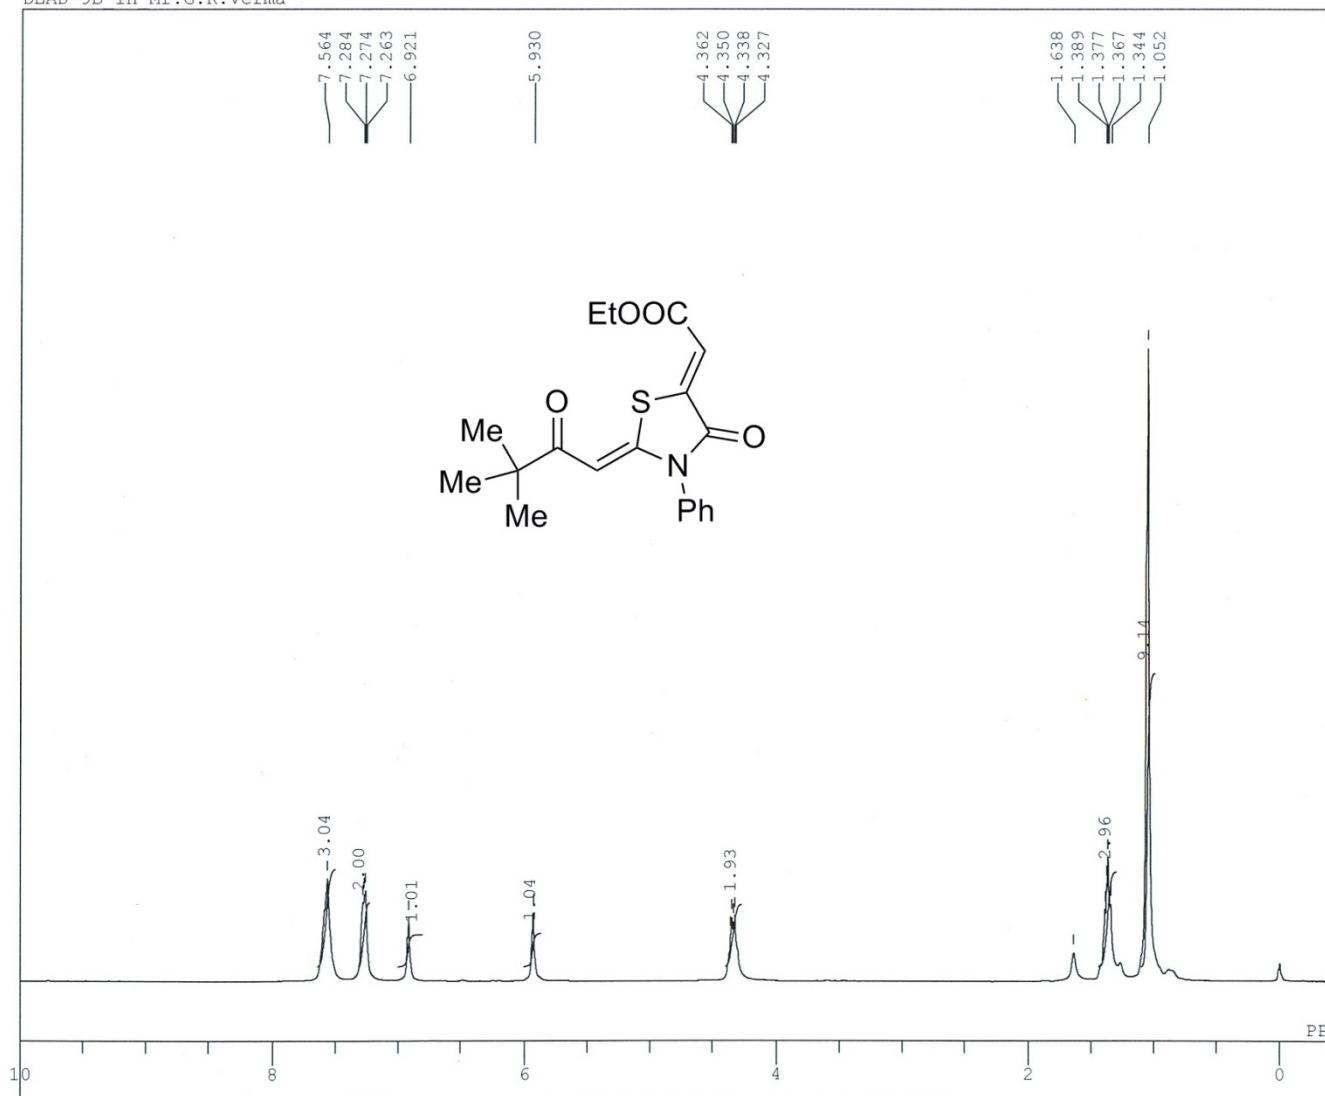

JEOL AL300 FTNMR  
CHEMISTRY DEPARTMENT  
Banaras Hindu University,  
VARANASI-221005

Operator : Nagendra Kumar  
Shishir Singh

DFILE C:\Girijesh K. Verma\DI  
COMNT DEAD-9B\_1H\_Mr.G.K.Verma  
DATIM Wed Jul 03 16:06:44 20:  
OBNUC 1H  
EXMOD NON  
OBFRQ 300.40 MHz  
OBSET 130.00 KHz  
OBFIN 1150.0 Hz  
POINT 32768  
FREQU 9505.7 Hz  
SCANS 28  
ACQTM 3.447 sec  
PD 1.547 sec  
PW1 5.2 us  
IRNUC 1H  
CTEMP 25.5 c  
SLVNT CDCL3  
EXREF 0.00 ppm  
BF 1.22 Hz  
RGAIN 16

C:\Girijesh K. Verma\DEAD-9B\_13C.als  
DEAD-9B\_13C Mr.G.K.Verma

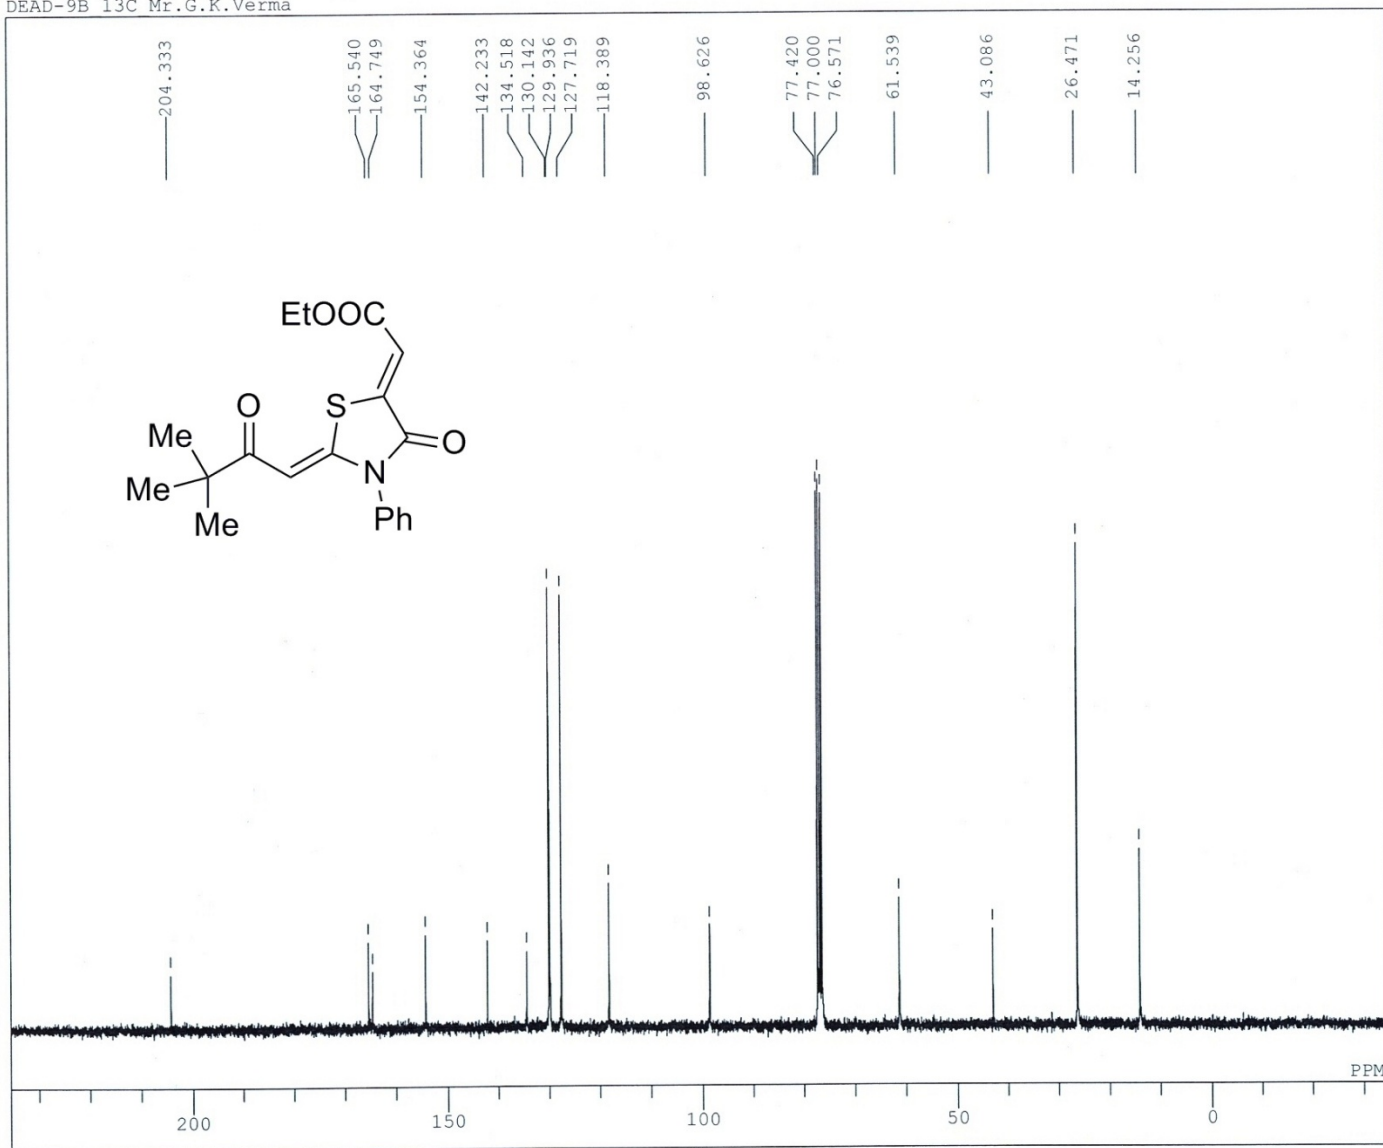

JEOL AL300 FTNMR  
CHEMISTRY DEPARTMENT  
Banaras Hindu University,  
VARANASI-221005

Operator : Nagendra Kumar  
Shishir Singh

DFILE C:\Girijesh K. Verma\DI  
COMNT DEAD-9B\_13C Mr.G.K.Verr  
DATIM Wed Jul\_03 20:06:22 20:  
OBNUC 13C  
EXMOD BCM  
OBFRQ 75.45 MHz  
OBSET 124.00 KHz  
OBFIN 1840.0 Hz  
POINT 32768  
FREQU 20408.1 Hz  
SCANS 2000  
ACQTM 1.606 sec  
PD 1.394 sec  
PW1 5.9 us  
IRNUC 1H  
CTEMP 21.8 c  
SLVNT CDCL3  
EXREF 77.00 ppm  
BF 1.20 Hz  
RGAIN 23



# <sup>1</sup>H & <sup>13</sup>C-NMR Spectra of 3la:

C:\Girijesh K. Verma\DEAD-20B\_1H.als  
DEAD-20B 1H Mr.G.K.Verma

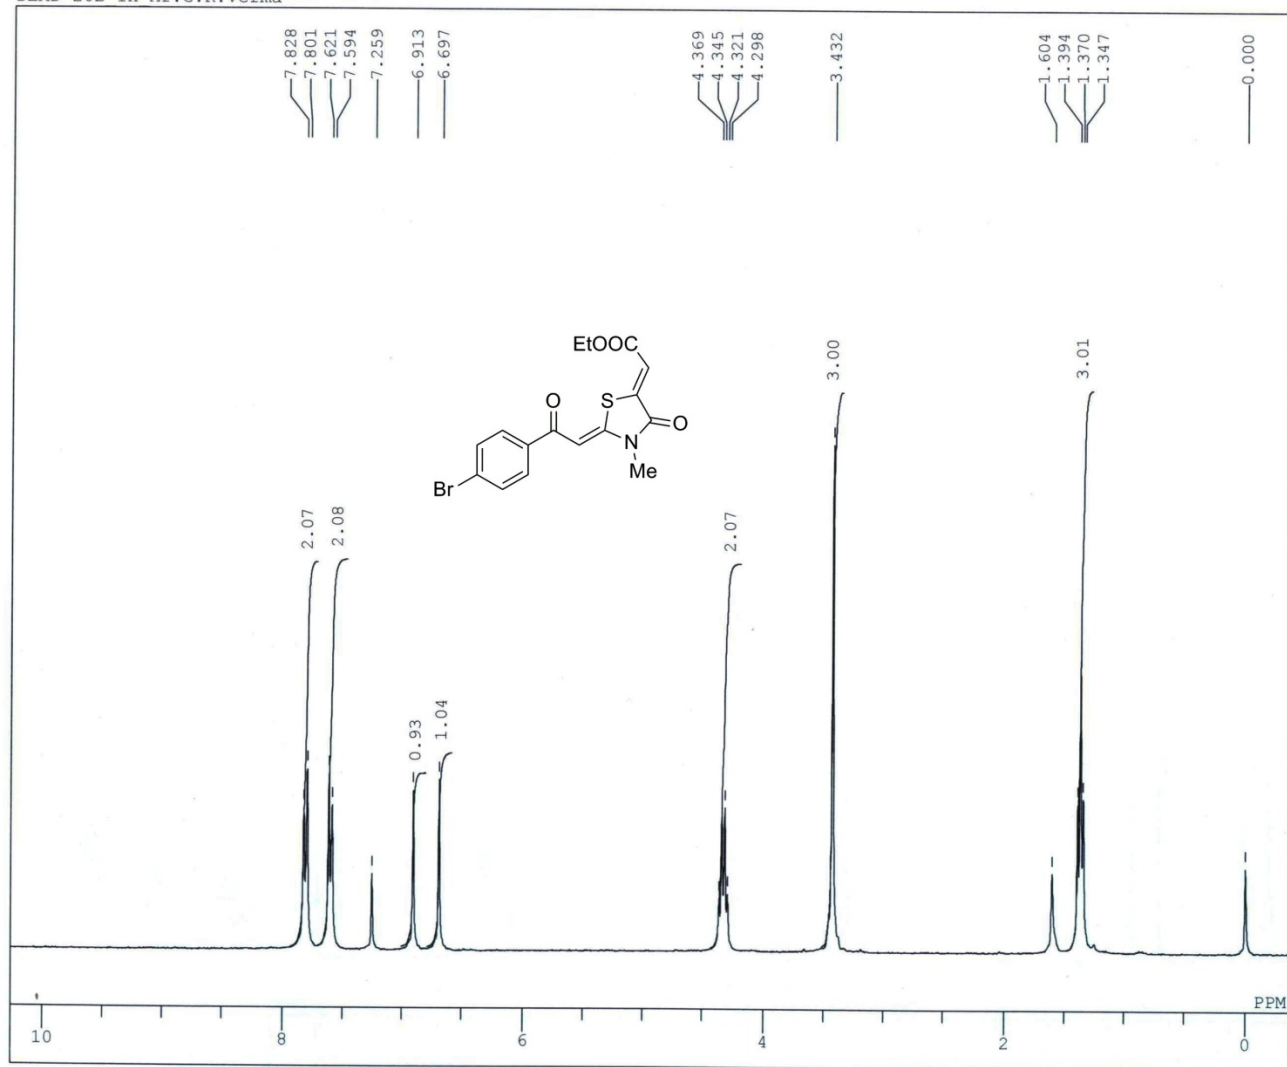

JEOL AL300 FTNMR  
CHEMISTRY DEPARTMENT  
Banaras Hindu University,  
VARANASI-221005

Operator : Nagendra Kumar  
Shishir Singh

DFILE C:\Girijesh K. Verma\DF  
COMNT DEAD-20B 1H Mr.G.K.Verr  
DATIM Tue Aug 13 17:42:23 20  
OBNUC 1H  
EXMOD NON  
OBFREQ 300.40 MHz  
OBSET 130.00 KHz  
OBFIN 1150.0 Hz  
POINT 32768  
FREQU 9505.7 Hz  
SCANS 8  
ACQTM 3.447 sec  
PD 1.547 sec  
PW1 5.2 us  
IRNUC 1H  
CTEMP 23.8 c  
SLVNT CDCL3  
EXREF 0.00 ppm  
BF 1.20 Hz  
RGAIN 21

C:\Girijesh K. Verma\DEAD-20B\_13C.als  
DEAD-20B 13C Mr.G.K.Verma

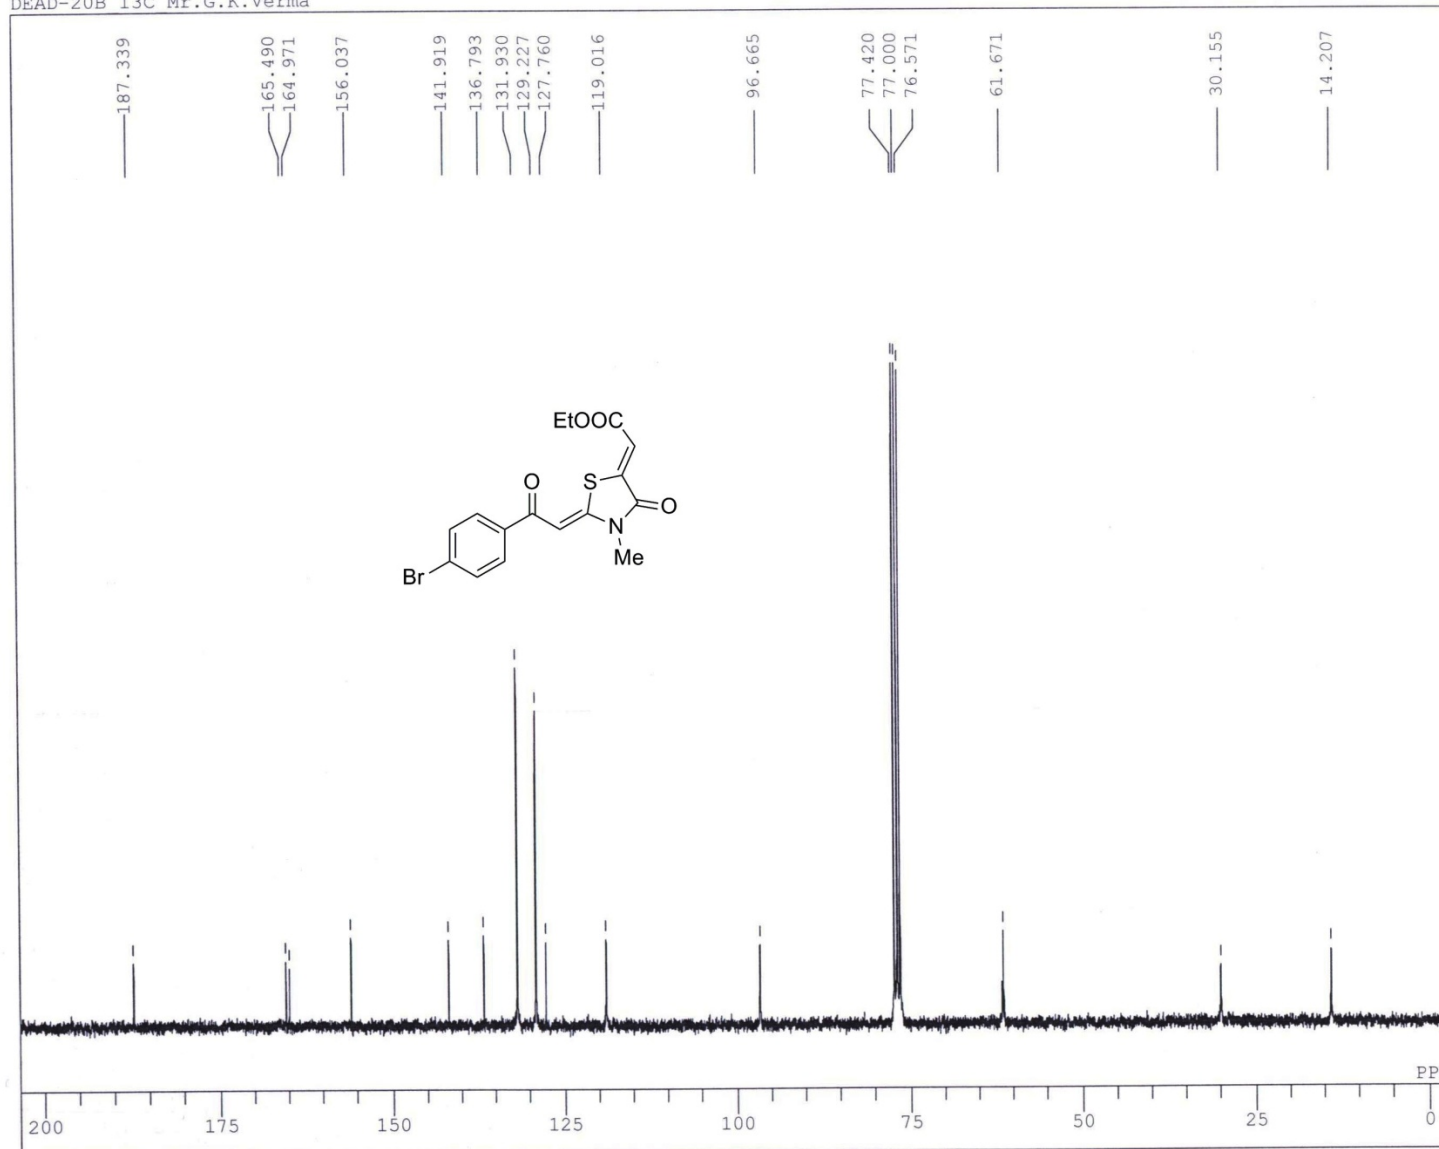

JEOL AL300 FTNMR  
CHEMISTRY DEPARTMENT  
Banaras Hindu University  
VARANASI-221005

Operator : Nagendra Kuma  
Shishir Singh

DFILE C:\Girijesh K. Ve  
COMNT DEAD-20B 13C Mr.G  
DATIM Tue Aug 20 09:54:  
OBNUC 13C  
EXMOD BCM  
OBFREQ 75.45 MHz  
OBSET 124.00 KHz  
OBFIN 1840.0 Hz  
POINT 32768  
FREQU 20408.1 Hz  
SCANS 1950  
ACQTM 1.606 sec  
PD 1.394 sec  
PW1 5.9 us  
IRNUC 1H  
CTEMP 22.5 c  
SLVNT CDCL3  
EXREF 77.00 ppm  
BF 1.20 Hz  
RGAIN 24

# <sup>1</sup>H & <sup>13</sup>C-NMR Spectra of 3ma:

C:\Girijesh K. Verma\DEAD-20A\_1H.als  
DEAD-20A 1H Mr. Girijesh

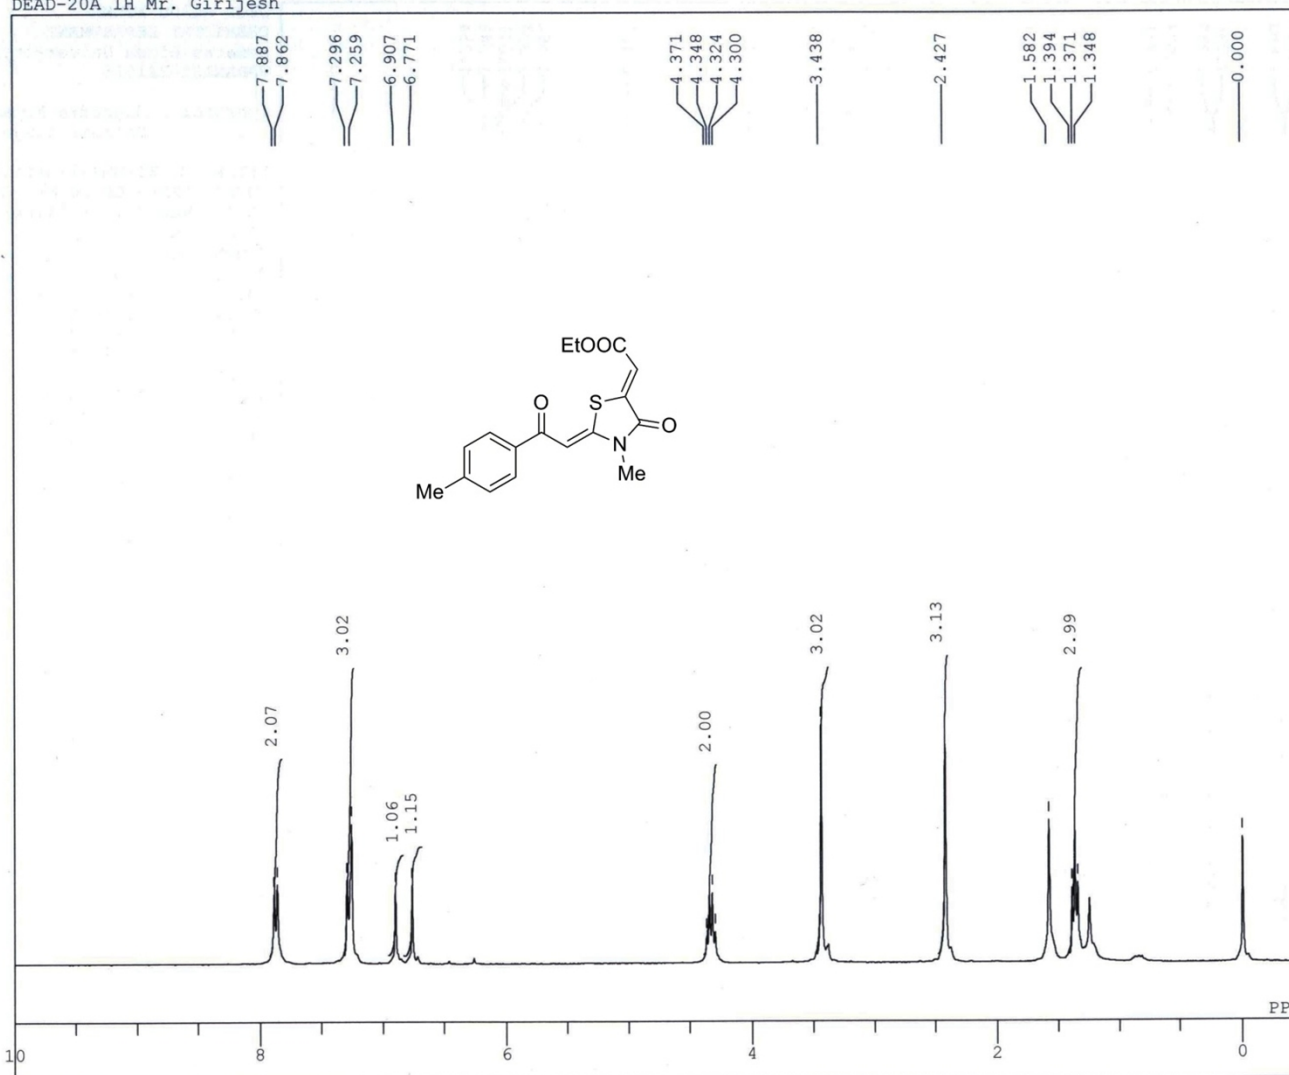

JEOL AL300 FTNMR  
CHEMISTRY DEPARTMENT  
Banaras Hindu University,  
VARANASI-221005

Operator : Nagendra Kumar  
Shishir Singh

DFILE C:\Girijesh K. Verma\DI  
COMNT DEAD-20A\_1H Mr. Girije:  
DATIM Wed Jul 24 14:04:16 20:  
OBNUC 1H  
EXMOD NON  
OBFRQ 300.40 MHz  
OBSET 130.00 KHz  
OBFIN 1150.0 Hz  
POINT 32768  
FREQU 6016.8 Hz  
SCANS 16  
ACQTM 5.446 sec  
PD 1.547 sec  
PW1 5.6 us  
IRNUC 1H  
CTEMP 22.4 c  
SLVNT CDCL3  
EXREF 0.00 ppm  
BF 1.20 Hz  
RGAIN 22

C:\Girijesh K. Verma\DEAD-20A\_13C2.als  
DEAD-20A 13C Mr.G.K.Verma

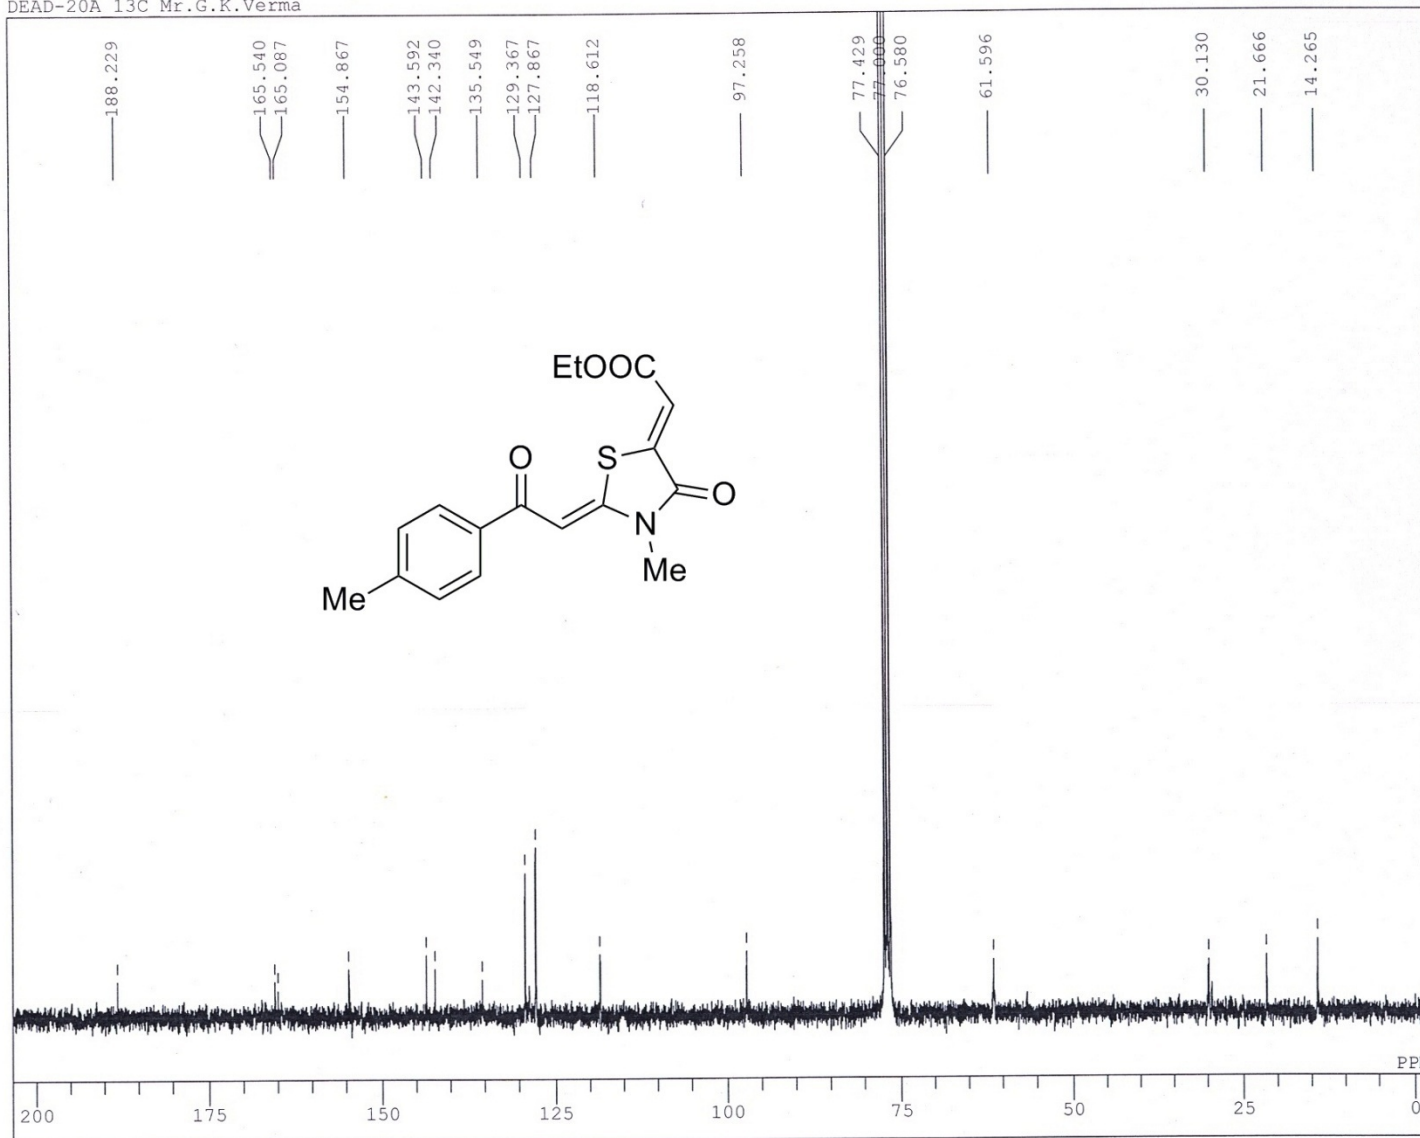

JEOL AL300 FTNMR  
CHEMISTRY DEPARTMENT  
Banaras Hindu University  
VARANASI-221005

Operator : Nagendra Kuma  
Shishir Singh

DFILE C:\Girijesh K. Ve  
COMNT DEAD-20A 13C Mr.G  
DATIM Tue Jul 30 07:30:  
OBNUC 13C  
EXMOD BCM  
OBFRQ 75.45 MHz  
OBSET 124.00 KHz  
OBFIN 1840.0 Hz  
POINT 32768  
FREQU 20408.1 Hz  
SCANS 2000  
ACQTM 1.606 sec  
PD 1.394 sec  
PW1 5.9 us  
IRNUC 1H  
CTEMP 22.1 c  
SLVNT CDCL3  
EXREF 77.00 ppm  
BF 1.20 Hz  
RGAIN 24

# <sup>1</sup>H & <sup>13</sup>C-NMR Spectra of 3na:

C:\Girijesh K. Verma\DEAD-18A\_1H.als  
DEAD-18A 1H Mr. Girijesh

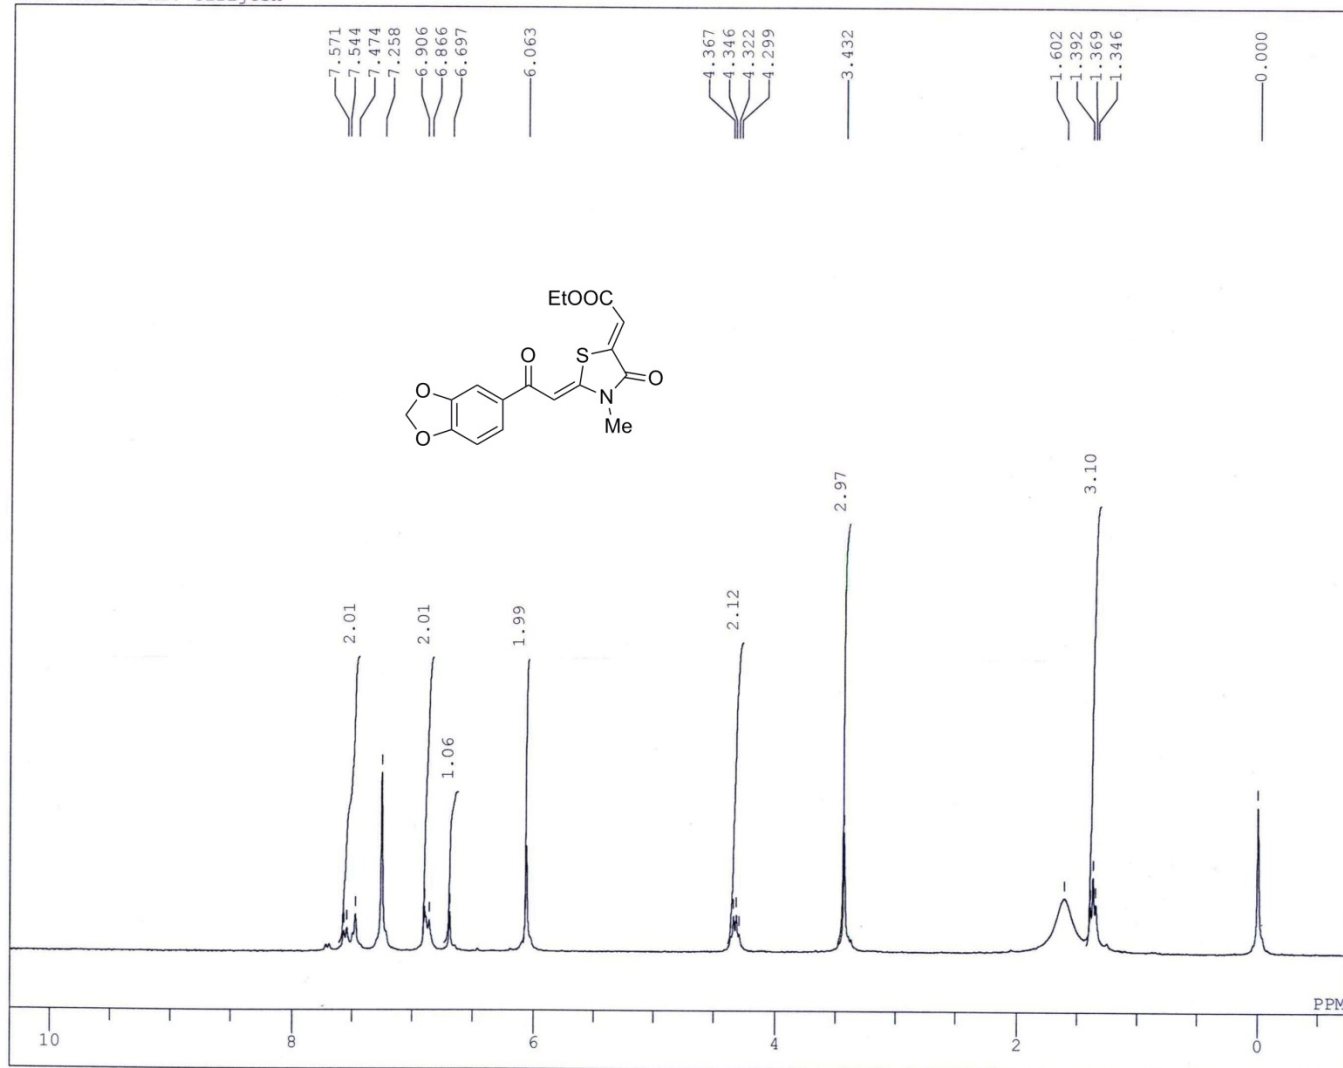

JEOL AL300 FTNMR  
CHEMISTRY DEPARTMENT  
Banaras Hindu University  
VARANASI-221005

Operator : Nagendra Kuma  
Shishir Singh

DFILE C:\Girijesh K. Ve  
COMNT DEAD-18A 1H Mr. G  
DATIM Thu Jul 18 16:40:  
OBNUC 1H  
EXMOD NON  
OBFRQ 300.40 MHz  
OBSET 130.00 KHz  
OBFIN 1150.0 Hz  
POINT 32768  
FREQU 9505.7 Hz  
SCANS 50  
ACQTM 3.447 sec  
PD 1.547 sec  
PW1 5.2 us  
IRNUC 1H  
CTEMP 20.5 c  
SLVNT CDCL3  
EXREF 0.00 ppm  
BF 1.20 Hz  
RGAIN 25

C:\Girijesh K. Verma\DEAD-18A\_13C.als  
DEAD-18A 13C Mr. G.K. Verma

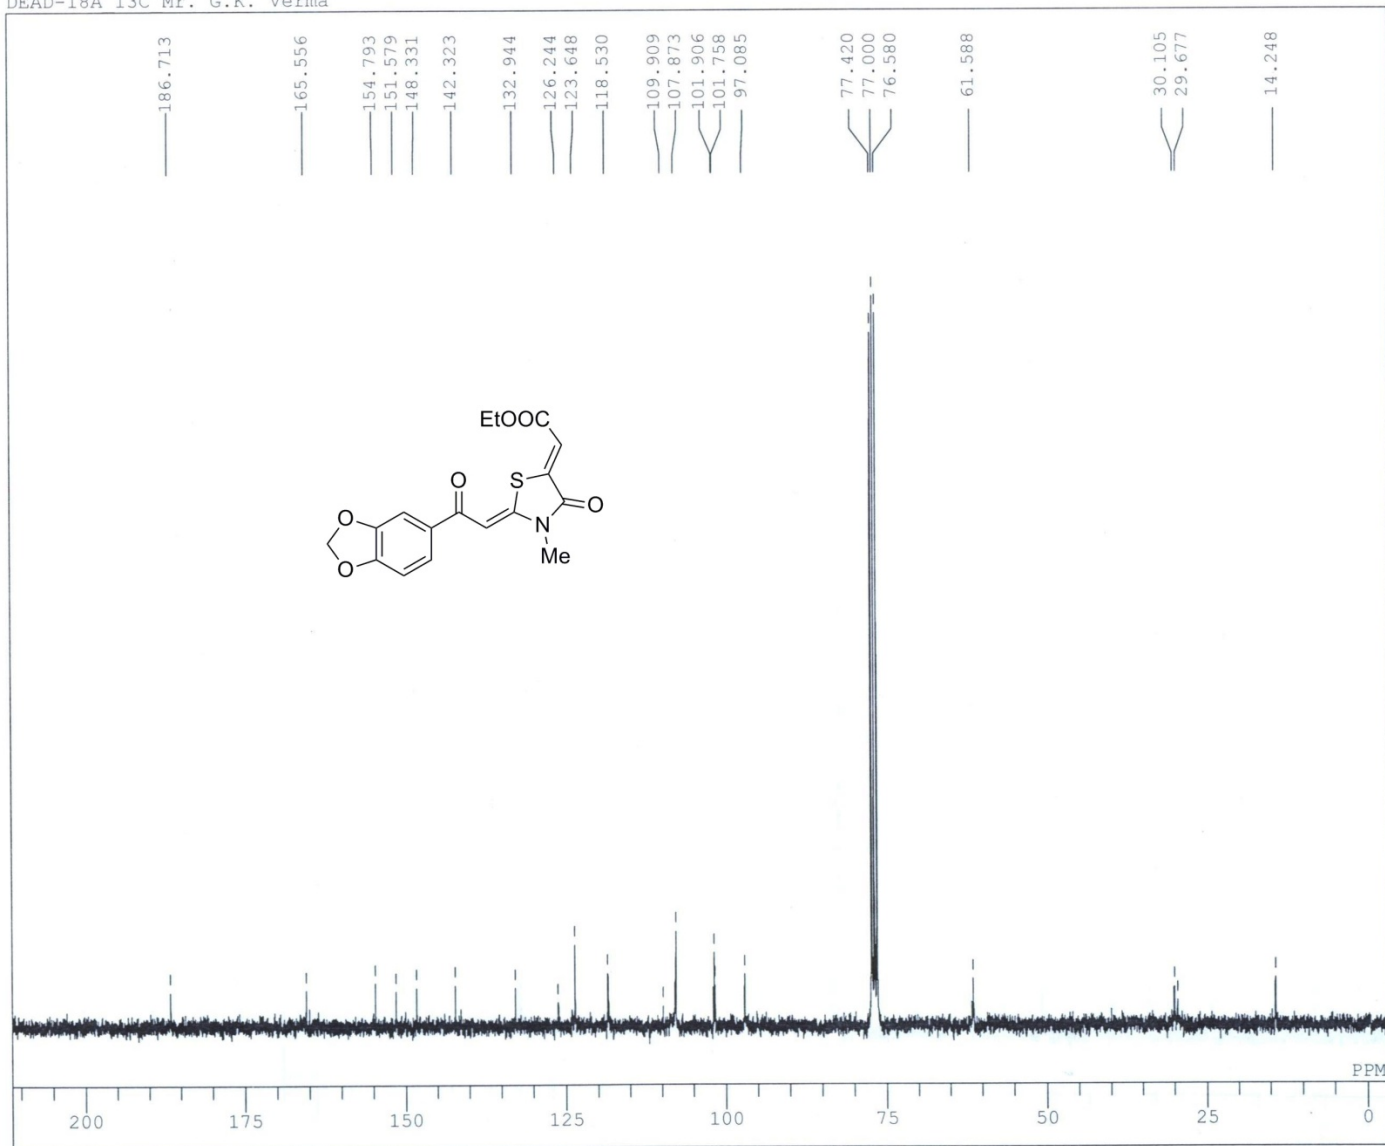

JEOL AL300 FTNMR  
CHEMISTRY DEPARTMENT  
Banaras Hindu University,  
VARANASI-221005

Operator : Nagendra Kumar  
Shishir Singh

DFILE C:\Girijesh K. Verma\DI  
COMNT DEAD-18A\_13C Mr. G.K. V  
DATIM Thu Aug 01 21:43:48 20  
OBNUC 13C  
EXMOD BCM  
OBFRQ 75.45 MHz  
OBSET 124.00 KHz  
OBFIN 1840.0 Hz  
POINT 32768  
FREQU 20408.1 Hz  
SCANS 2000  
ACQTM 1.606 sec  
PD 1.394 sec  
PW1 5.9 us  
IRNUC 1H  
CTEMP 25.0 c  
SLVNT CDCL3  
EXREF 77.00 ppm  
BF 1.20 Hz  
RGAIN 24

# <sup>1</sup>H & <sup>13</sup>C-NMR Spectra of 30a:

C:\Girijesh K. Verma\DEAD-21A\_1H\_als  
DEAD-21A 1H Mr.G.K.Verma

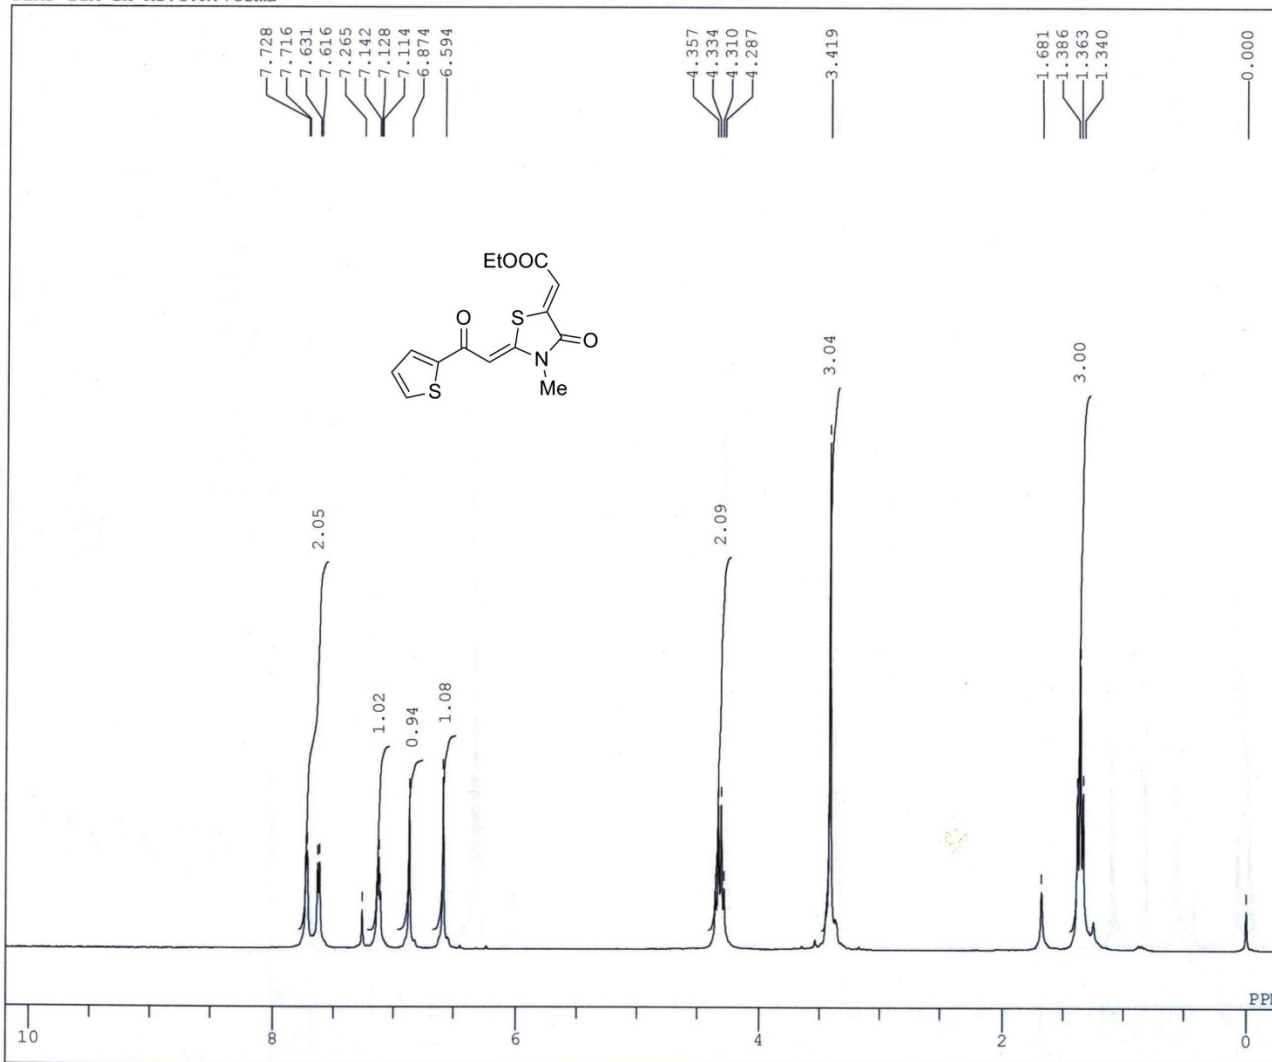

JEOL AL300 FTNMR  
CHEMISTRY DEPARTMENT  
Banaras Hindu University,  
VARANASI-221005

Operator : Nagendra Kumar  
Shishir Singh

DFILE C:\Girijesh K. Verma\DEAD-21A\_1H\_Mr.G.K.Verr  
COMNT DEAD-21A\_1H\_Mr.G.K.Verr  
DATIM Wed Jul 24 17:54:15 20  
OBNUC 1H  
EXMOD NON  
OBFRQ 300.40 MHz  
OBSET 130.00 KHz  
OBFIN 1150.0 Hz  
POINT 32768  
FREQU 9505.7 Hz  
SCANS 16  
ACQTM 3.447 sec  
PD 1.547 sec  
PW1 5.2 us  
IRNUC 1H  
CTEMP 24.1 c  
SLVNT CDCL3  
EXREF 0.00 ppm  
BF 1.20 Hz  
RGAIN 17

C:\WINNMR98\Data\DEAD-21A\_13C1BCM\_E3.als  
DEAD-21A 13C Mr. G.K. Verma

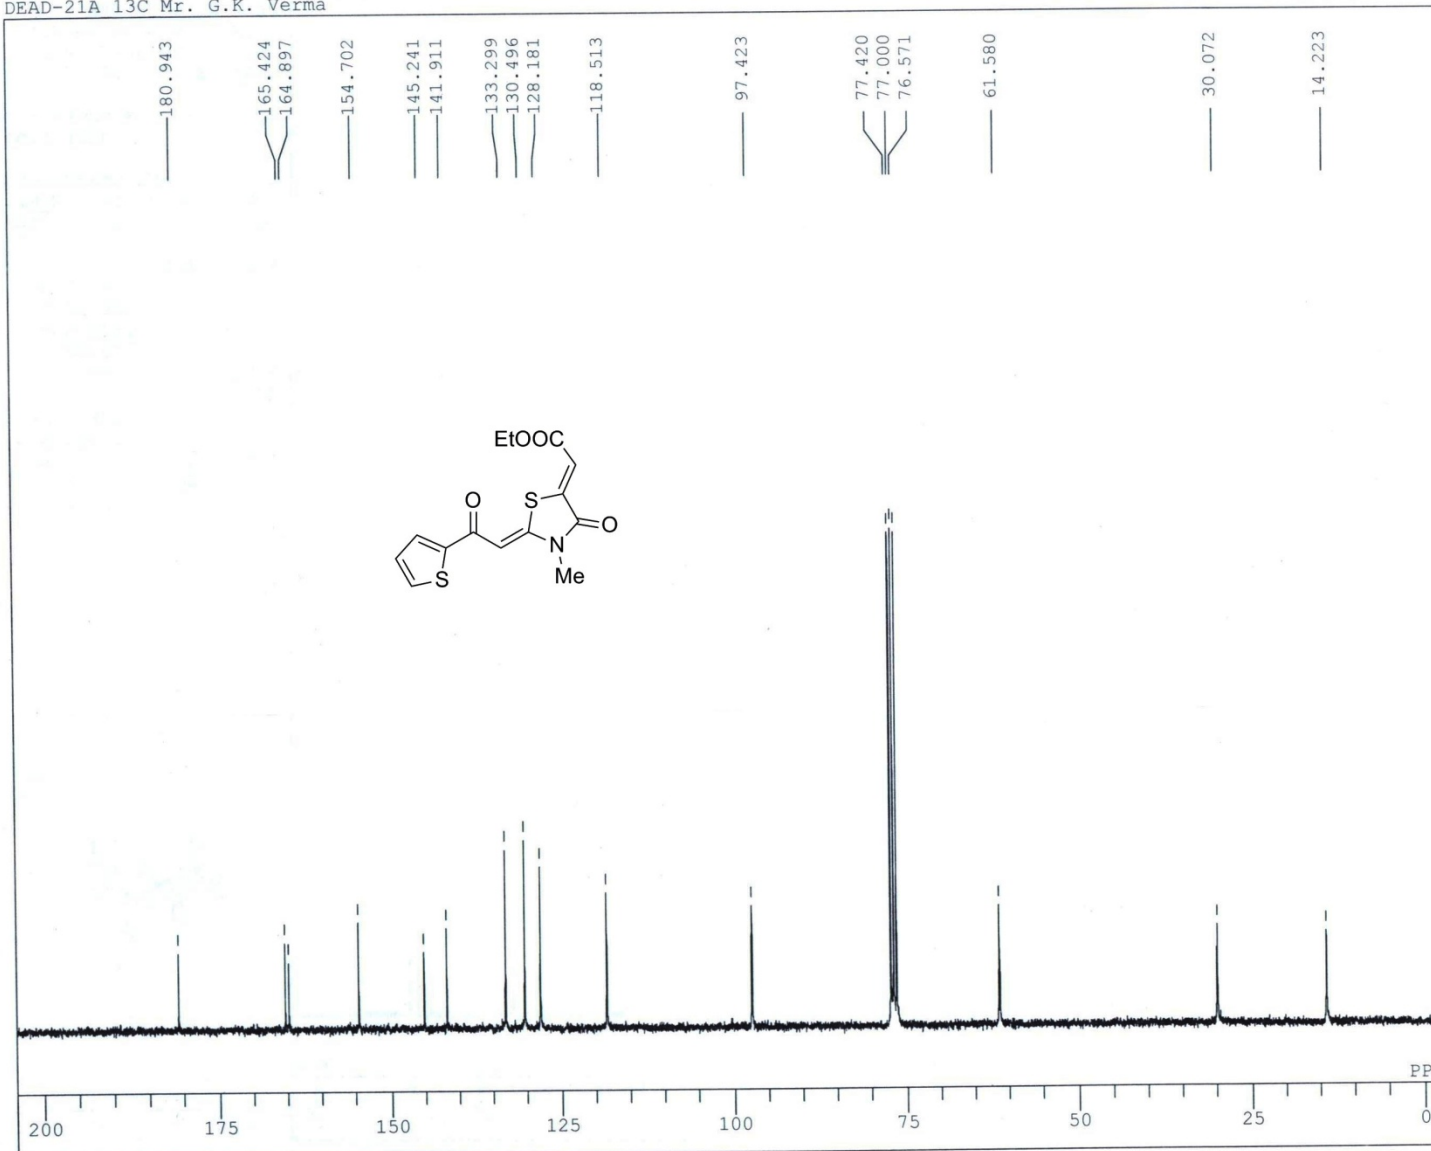

JEOL AL300 FTNMR  
CHEMISTRY DEPARTMENT  
Banaras Hindu University  
VARANASI-221005

Operator : Nagendra Kuma  
Shishir Singh

DFILE C:\WINNMR98\Data\  
COMNT DEAD-21A 13C Mr. V  
DATIM Thu Aug 01 00:08:  
OBNUC 13C  
EXMOD BCM  
OBFREQ 75.45 MHz  
OBSET 124.00 KHz  
OBFIN 1840.0 Hz  
POINT 32768  
FREQU 20408.1 Hz  
SCANS 2500  
ACQTM 1.606 sec  
PD 1.394 sec  
PW1 5.9 us  
IRNUC 1H  
CTEMP 23.2 c  
SLVNT CDCL3  
EXREF 77.00 ppm  
BF 1.20 Hz  
RGAIN 24



# <sup>1</sup>H & <sup>13</sup>C-NMR Spectra of 3mb:

C:\Girijesh K. Verma\DEAD-24A\_1H.als  
DEAD-24A\_13C Mr.G.K.Verma

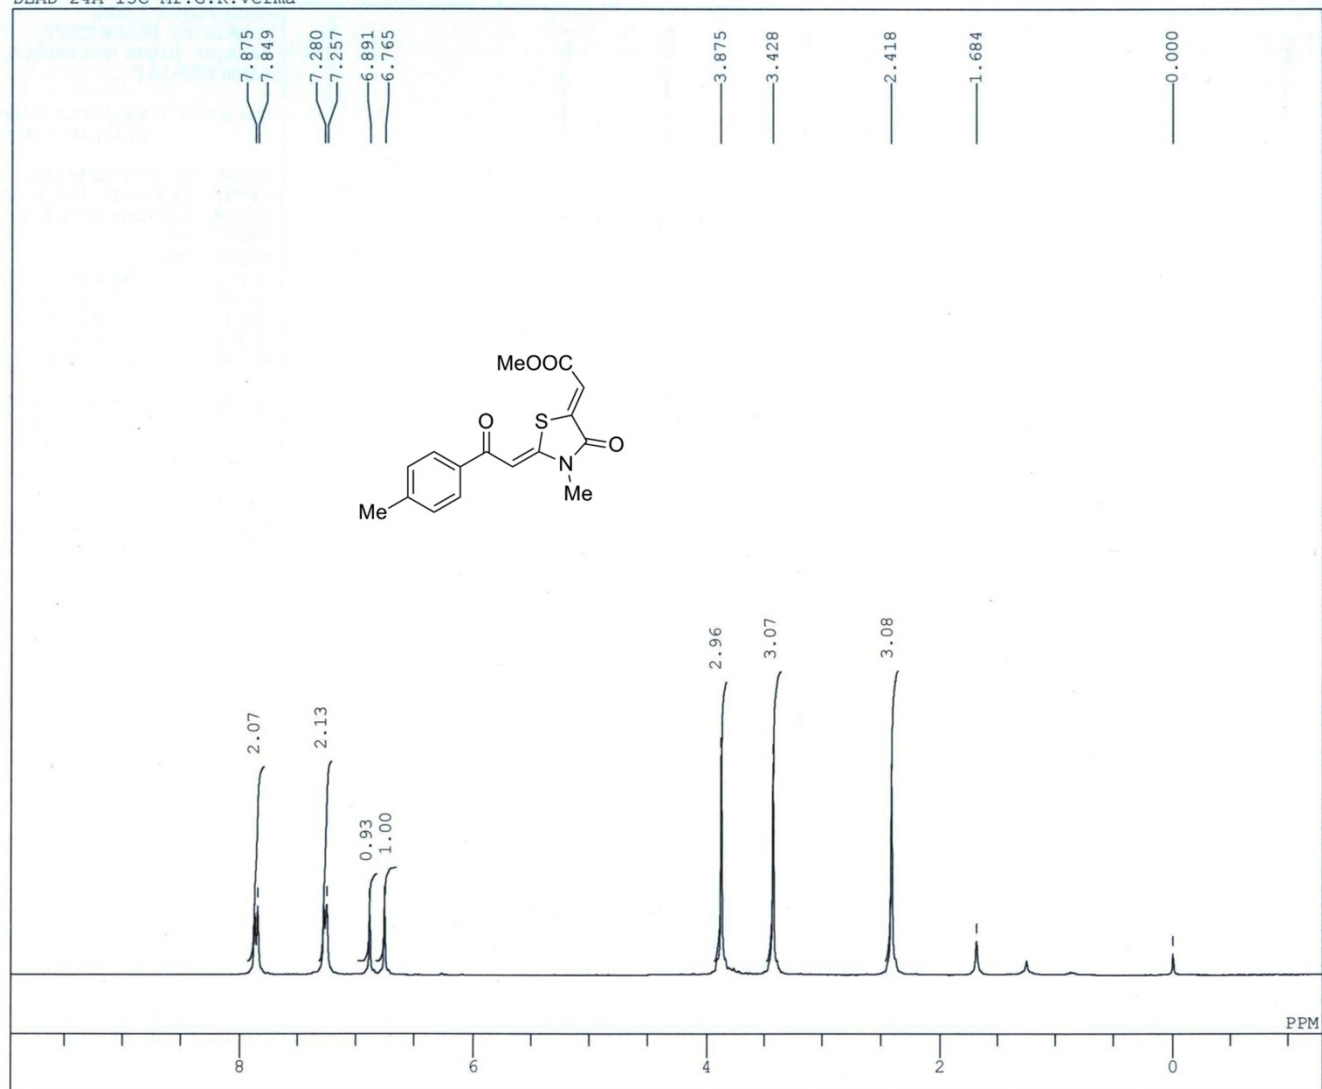

JEOL AL300 FTNMR  
CHEMISTRY DEPARTMENT  
Banaras Hindu University,  
VARANASI-221005

Operator : Nagendra Kumar  
Shishir Singh

DFILE C:\Girijesh K. Verma\DI  
COMNT DEAD-24A\_13C Mr.G.K.Ve  
DATIM Tue Aug 06 23:58:40 20:  
OBNUC 1H  
EXMOD NON  
OBFRQ 300.40 MHz  
OBSET 130.00 KHz  
OBFIN 1150.0 Hz  
POINT 32768  
FREQU 6016.8 Hz  
SCANS 32  
ACQTM 5.446 sec  
PD 1.547 sec  
PW1 5.6 us  
IRNUC 1H  
CTEMP 17.1 c  
SLVNT CDCL3  
EXREF 0.00 ppm  
BF 1.22 Hz  
RGAIN 17

C:\Girijesh K. Verma\DEAD-24A\_13C.als  
 DEAD-24A 13C Mr.G.K.Verma

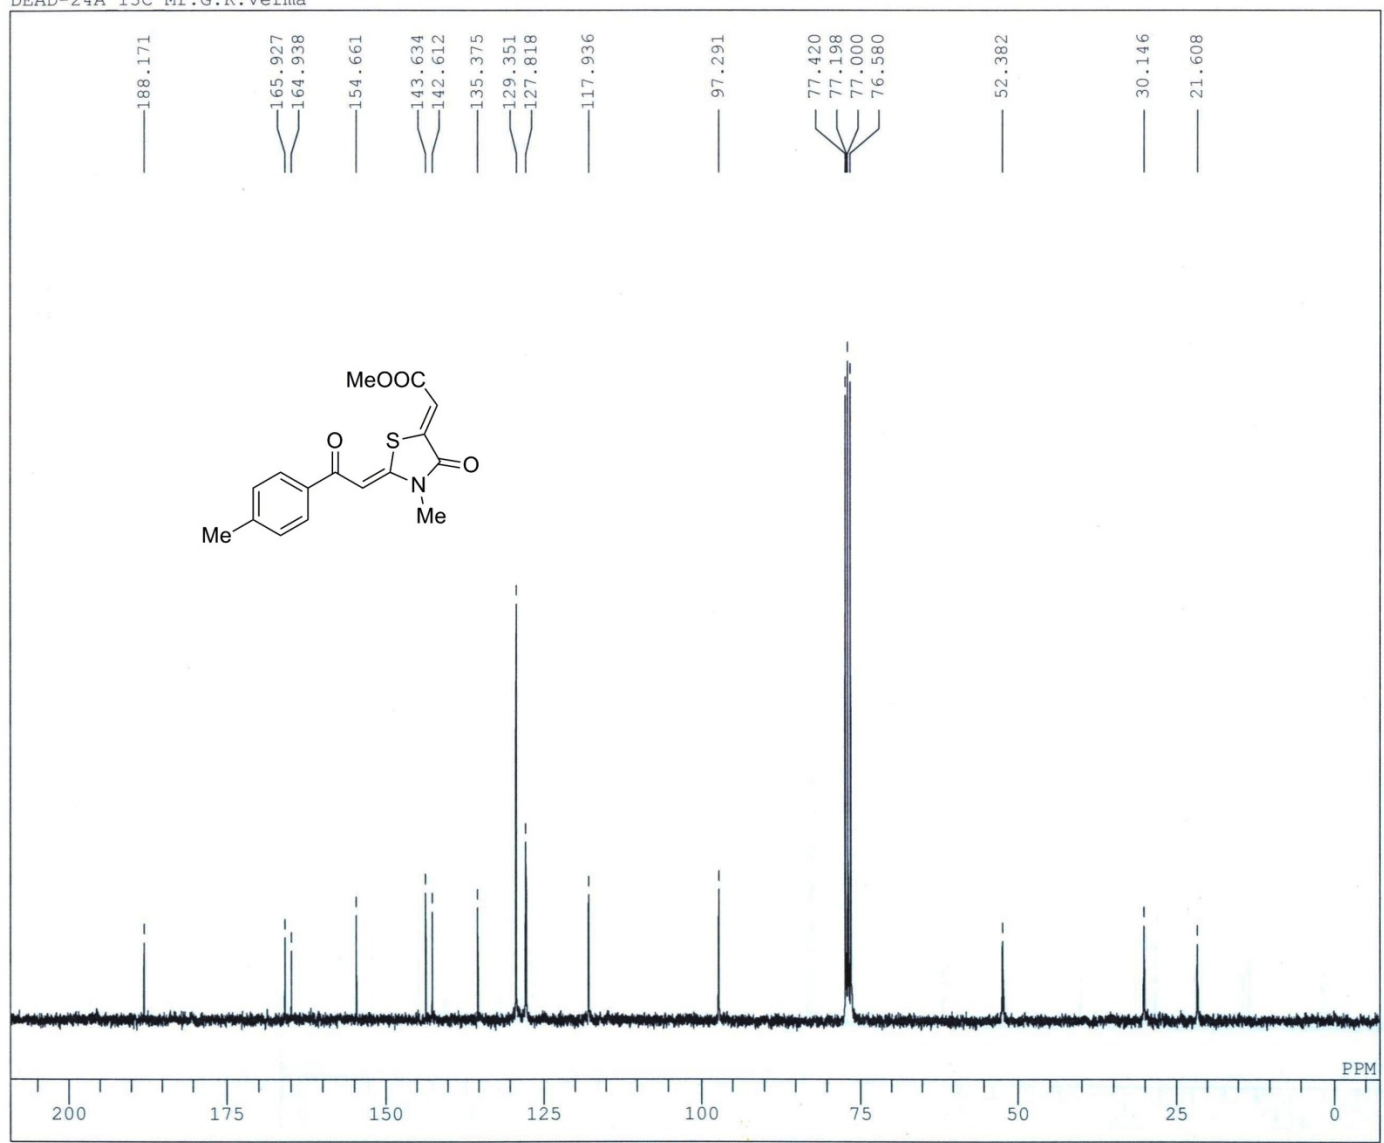

JEOL AL300 FTNMR  
 CHEMISTRY DEPARTMENT  
 Banaras Hindu University,  
 VARANASI-221005

Operator : Nagendra Kumar  
 Shishir Singh

DFILE C:\Girijesh K. Verma\DI  
 COMNT DEAD-24A 13C Mr.G.K.Ve  
 DATIM Wed Aug 07 01:39:03 20:  
 OBNUC 13C  
 EXMOD BCM  
 OBFRQ 75.45 MHz  
 OBSET 124.00 KHz  
 OBFIN 1840.0 Hz  
 POINT 32768  
 FREQU 20408.1 Hz  
 SCANS 2000  
 ACQTM 1.606 sec  
 PD 1.394 sec  
 PW1 5.9 us  
 IRNUC 1H  
 CTEMP 19.1 c  
 SLVNT CDCL3  
 EXREF 77.00 ppm  
 BF 1.22 Hz  
 RGAIN 24

# <sup>1</sup>H & <sup>13</sup>C-NMR Spectra of 3lb:

C:\WINNMR98\COMMON\DEFAULT.ALS  
DEAD-23A 1H Mr.G.K.Verma

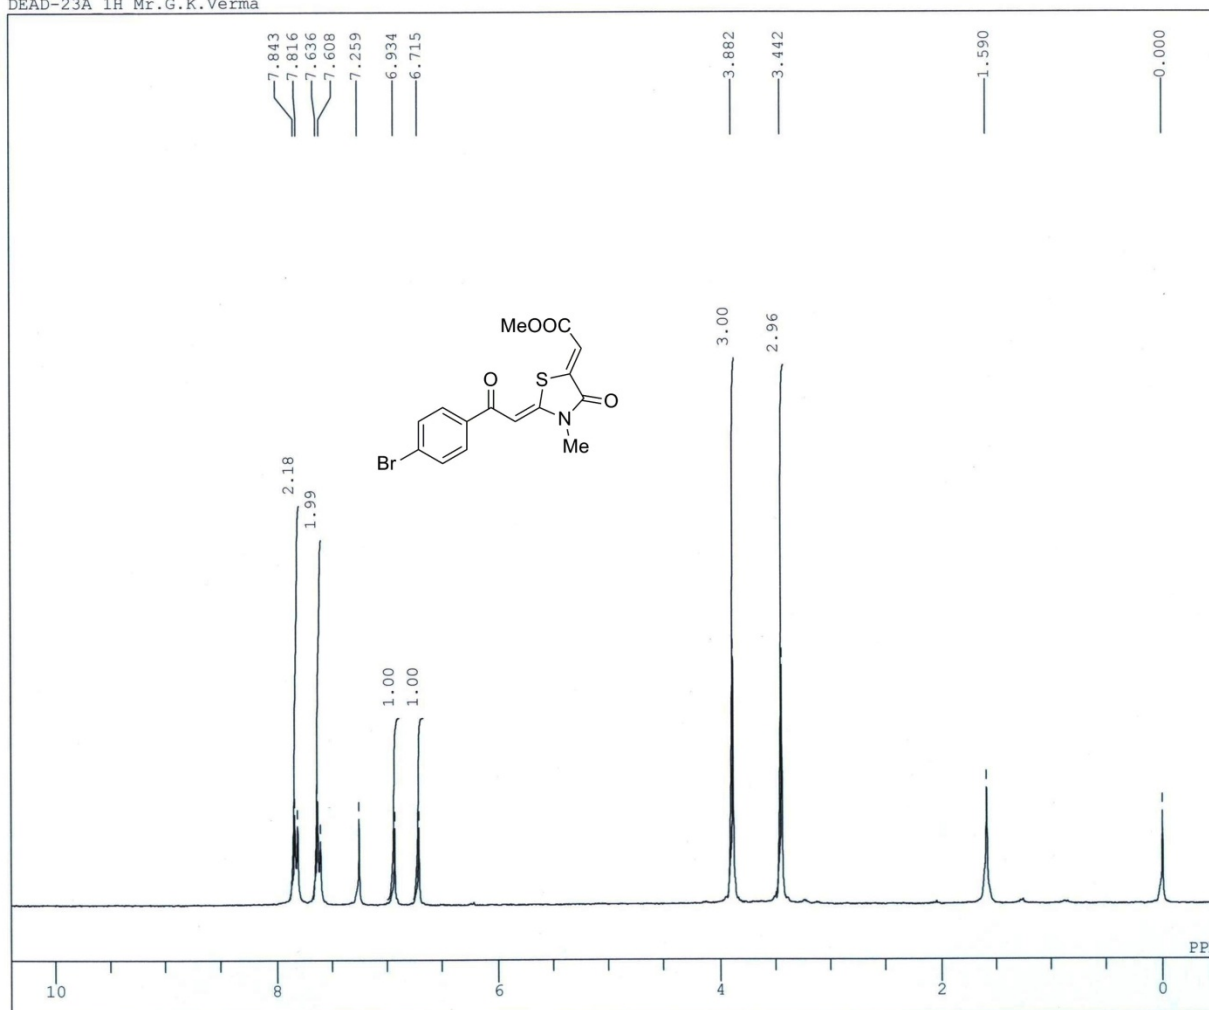

JEOL AL300 FTNMR  
CHEMISTRY DEPARTMENT  
Banaras Hindu University,  
VARANASI-221005

Operator : Nagendra Kumar  
Shishir Singh

DFILE C:\WINNMR98\COMMON\DEI  
COMNT DEAD-23A 1H Mr.G.K.Verr  
DATIM Mon Aug 12 16:45:31 20  
OBNUC 1H  
EXMOD NON  
OBFRQ 300.40 MHz  
OBSET 130.00 KHz  
OBFIN 1150.0 Hz  
POINT 32768  
FREQU 9505.7 Hz  
SCANS 9  
ACQTM 3.447 sec  
PD 1.547 sec  
PW1 5.2 us  
IRNUC 1H  
CTEMP 21.7 c  
SLVNT CDCL3  
EXREF 0.00 ppm  
BF 1.20 Hz  
RGAIN 23

C:\Girijesh K. Verma\DEAD-23A\_13C.als  
DEAD-23A 13C Mr.G.K.Verma

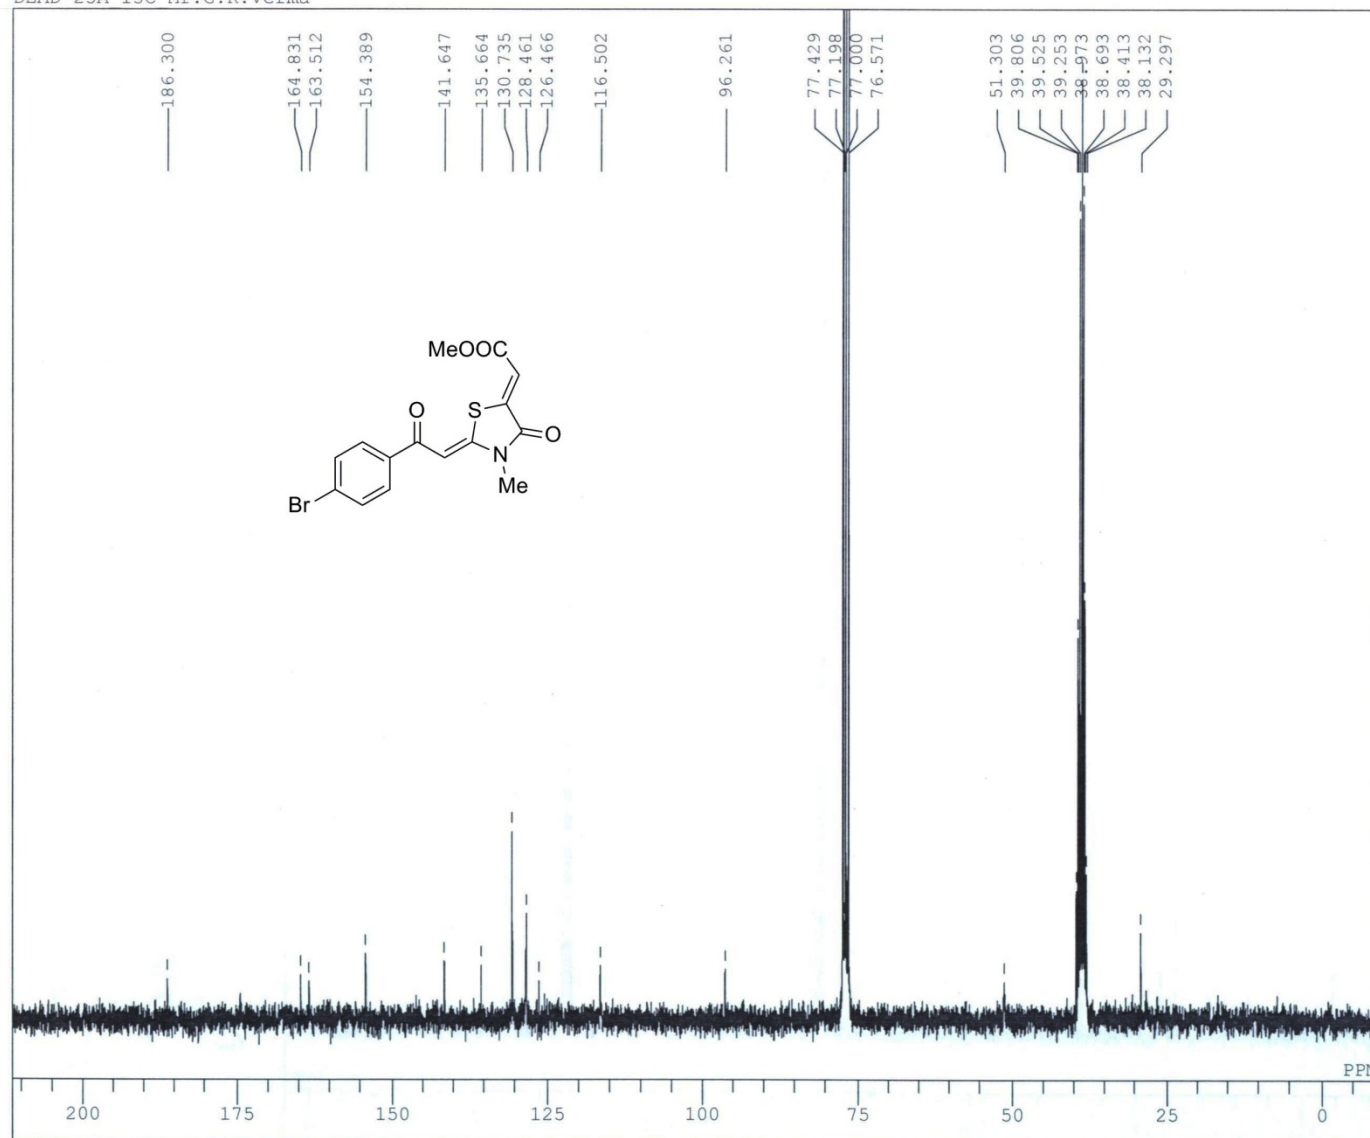

JEOL AL300 FTNMR  
CHEMISTRY DEPARTMENT  
Banaras Hindu University,  
VARANASI-221005

Operator : Nagendra Kumar  
Shishir Singh

DFILE C:\Girijesh K. Verma\DEAD-23A\_13C.Mr.G.K.Verma  
COMNT DEAD-23A\_13C Mr.G.K.Verma  
DATIM Tue Aug 13 23:14:46 2008  
OBNUC 13C  
EXMOD BCM  
OBFRQ 75.45 MHz  
OBSET 124.00 KHz  
OBFIN 1840.0 Hz  
POINT 32768  
FREQU 20408.1 Hz  
SCANS 2000  
ACQTM 1.606 sec  
PD 1.394 sec  
PW1 5.9 us  
IRNUC 1H  
CTEMP 23.7 c  
SLVNT CDCL3  
EXREF 77.00 ppm  
BF 1.20 Hz  
RGAIN 23

# <sup>1</sup>H & <sup>13</sup>C-NMR Spectra of 3nb:

C:\WINNMR98\Data\DEAD-22C\_1H2NON\_E1.als  
DEAD-22C 1H Mr. Girijesh

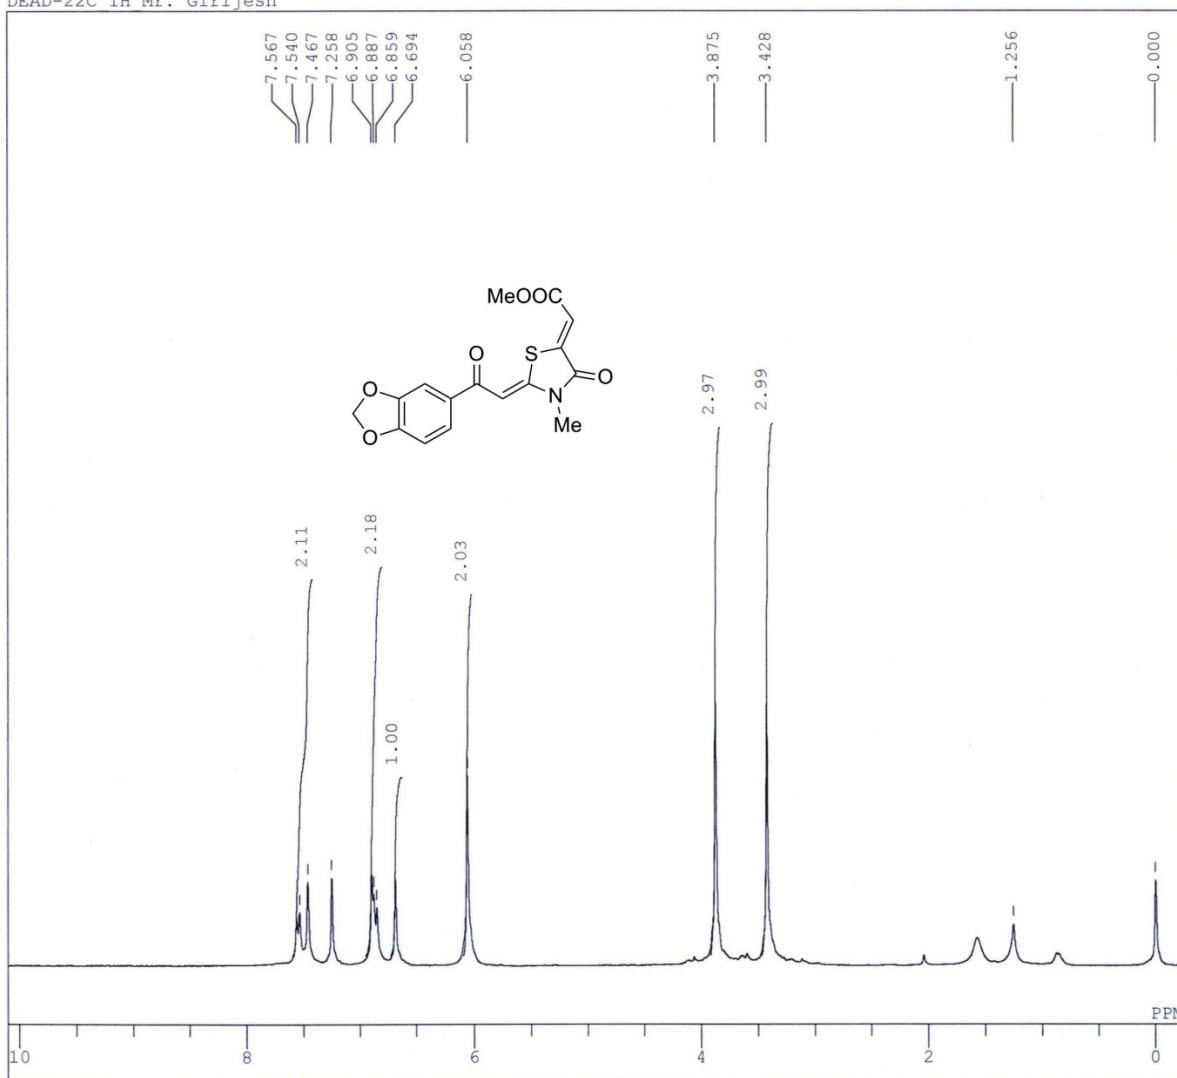

JEOL AL300 FTNMR  
CHEMISTRY DEPARTMENT  
Banaras Hindu University,  
VARANASI-221005

Operator : Nagendra Kumar  
Shishir Singh

DFILE C:\WINNMR98\Data\DEAD-22C\_1H2NON\_  
COMNT DEAD-22C\_1H\_Mr. Girijesh  
DATIM Mon Dec 02 15:34:57 2013  
OBNUC 1H  
EXMOD NON  
OBFRQ 300.40 MHz  
OBSET 130.00 KHz  
OBFIN 1150.0 Hz  
POINT 32768  
FREQU 6016.8 Hz  
SCANS 32  
ACQTM 5.446 sec  
PD 1.547 sec  
PW1 5.6 us  
IRNUC 1H  
CTEMP 22.5 c  
SLVNT CDCL3  
EXREF 0.00 ppm  
BF 1.20 Hz  
RGAIN 22

C:\Girijesh K. Verma\DEAD-22C\_13C.als  
DEAD-22C 13C Mr. Girijesh

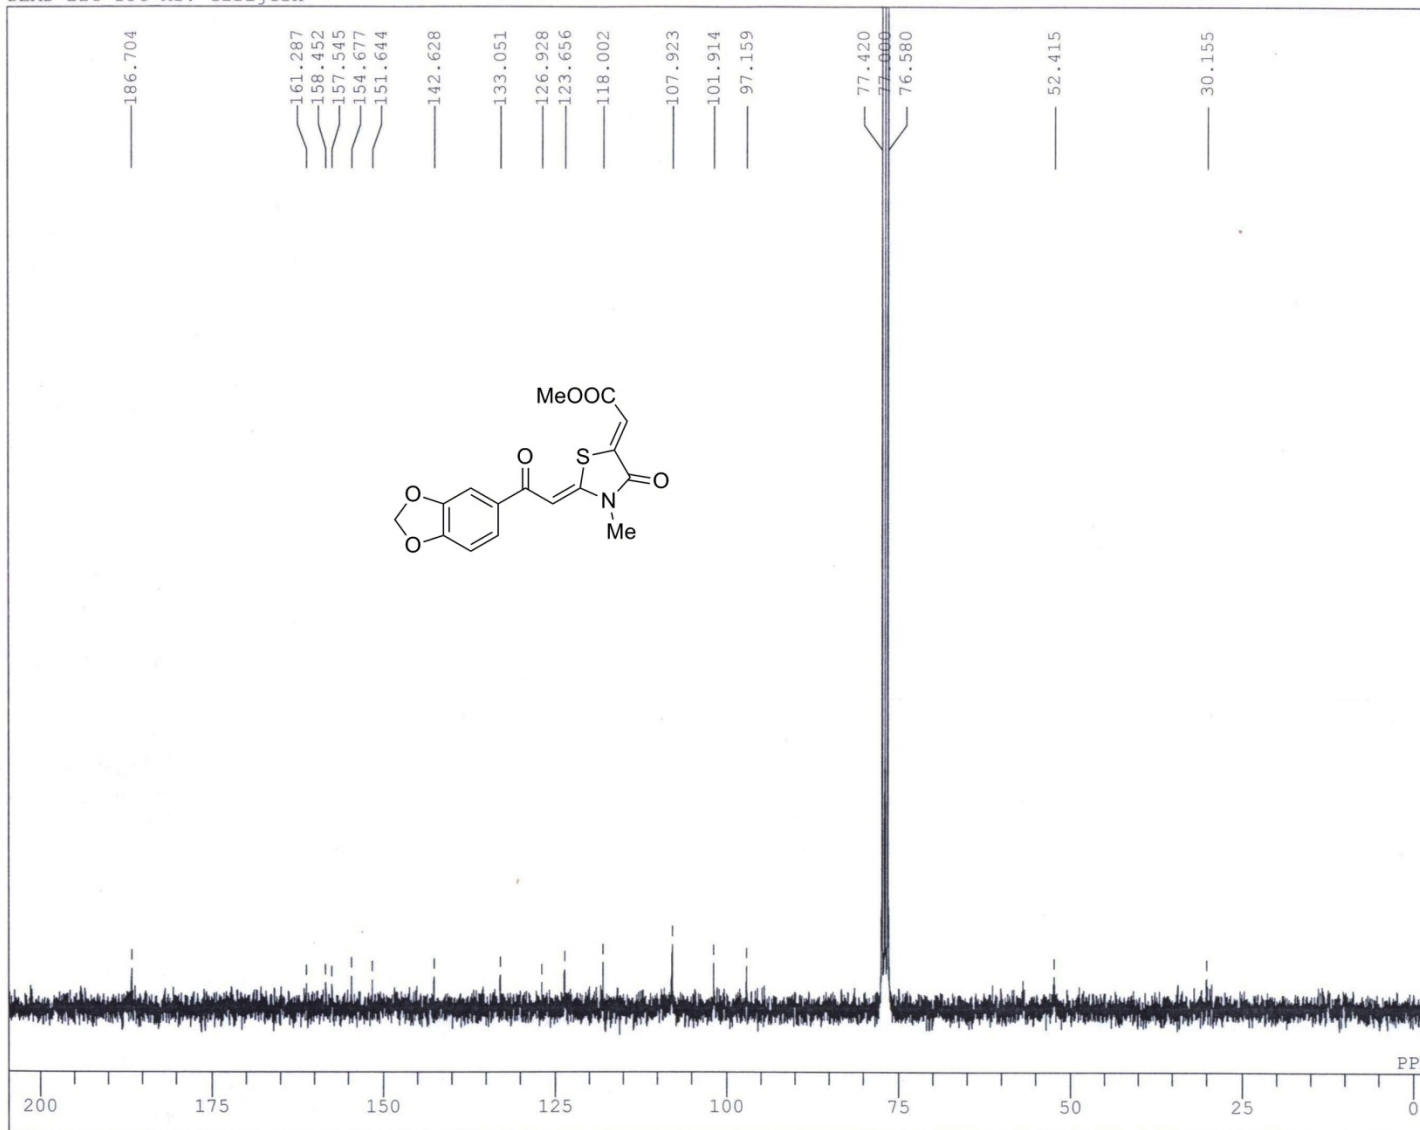

JEOL AL300 FTNMR  
CHEMISTRY DEPARTMENT  
Banaras Hindu University  
VARANASI-221005

Operator : Nagendra Kuma  
Shishir Singh

DFILE C:\Girijesh K. Ve  
COMNT DEAD-22C\_13C Mr. (   
DATIM Mon Dec 02 15:30:   
OBNUC 13C  
EXMOD BCM  
OBFRQ 75.45 MHz  
OBSET 124.00 KHz  
OBFIN 1840.0 Hz  
POINT 32768  
FREQU 20408.1 Hz  
SCANS 600  
ACQTM 1.606 sec  
PD 1.394 sec  
PW1 5.9 us  
IRNUC 1H  
CTEMP 40.3 c  
SLVNT CDCL3  
EXREF 77.00 ppm  
BF 1.20 Hz  
RGAIN 22

# <sup>1</sup>H & <sup>13</sup>C-NMR Spectra of 3ob:

C:\Girijesh K. Verma\DEAD-25A\_1H.als  
DEAD-25A 1H Mr.G.K.Verma

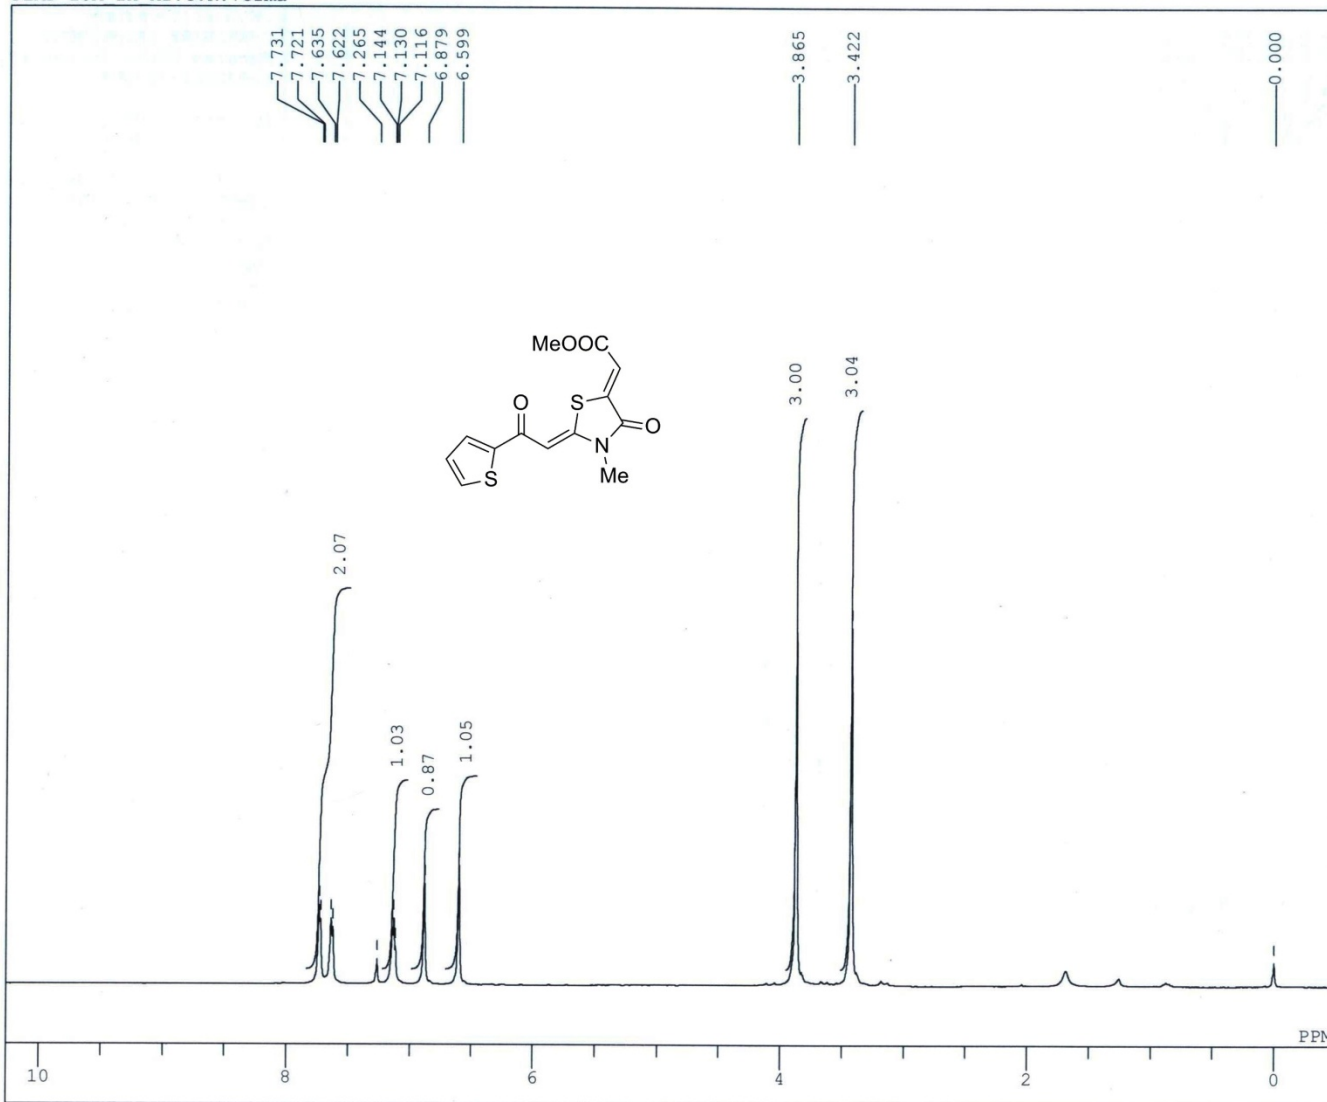

JEOL AL300 FTNMR  
CHEMISTRY DEPARTMENT  
Banaras Hindu University,  
VARANASI-221005

Operator : Nagendra Kumar  
Shishir Singh

DFILE C:\Girijesh K. Verma\DI  
COMNT DEAD-25A 1H Mr.G.K.Verr  
DATIM Mon Aug 05 16:13:43 20  
OBNUC 1H  
EXMOD NON  
OBFREQ 300.40 MHz  
OBSET 130.00 KHz  
OBFIN 1150.0 Hz  
POINT 32768  
FREQU 9505.7 Hz  
SCANS 16  
ACQTM 3.447 sec  
PD 1.547 sec  
PW1 5.2 us  
IRNUC 1H  
CTEMP 25.8 c  
SLVNT CDCL3  
EXREF 0.00 ppm  
BF 1.22 Hz  
RGAIN 18

C:\Girijesh K. Verma\DEAD-25A\_13C.als  
DEAD-25A 13C Mr.G.K.Verma

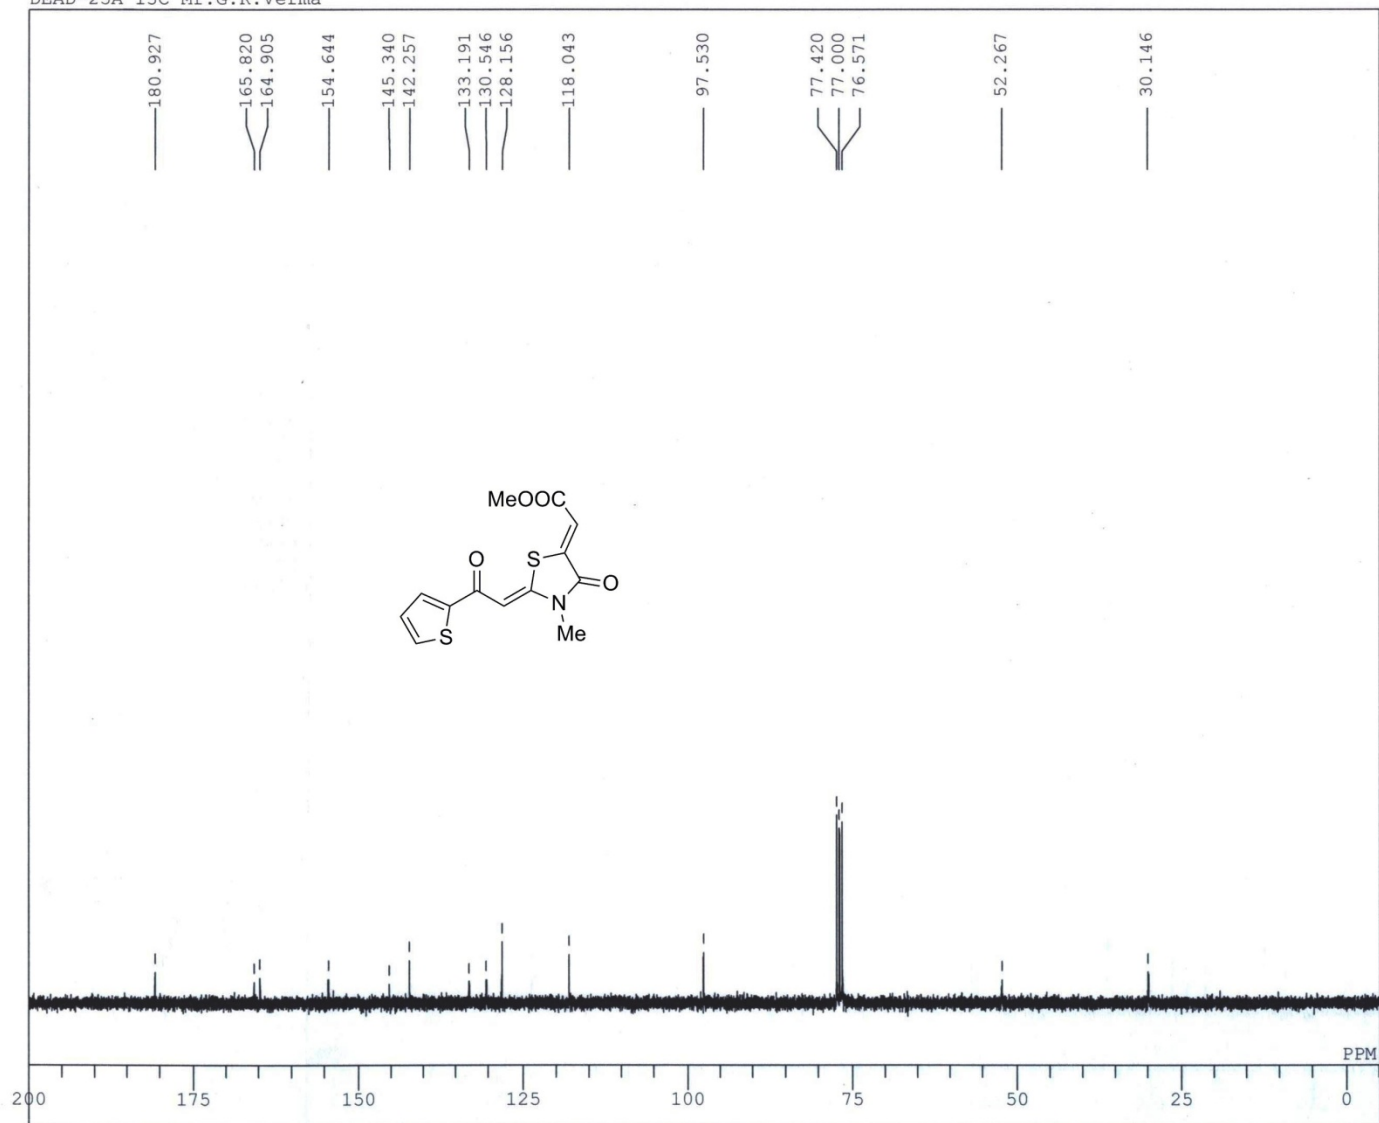

JEOL AL300 FTNMR  
CHEMISTRY DEPARTMENT  
Banaras Hindu University,  
VARANASI-221005

Operator : Nagendra Kumar  
Shishir Singh

DFILE C:\Girijesh K. Verma\DI  
COMNT DEAD-25A\_13C\_Mr.G.K.Ve  
DATIM Mon Aug 05 15:31:57 20  
OBNUC 13C  
EXMOD BCM  
OBFRQ 75.45 MHz  
OBSET 124.00 KHz  
OBFIN 1840.0 Hz  
POINT 32768  
FREQU 20408.1 Hz  
SCANS 307  
ACQTM 1.606 sec  
PD 1.394 sec  
PWL 5.9 us  
IRNUC 1H  
CTEMP 25.5 c  
SLVNT CDCL3  
EXREF 77.00 ppm  
BF 0.12 Hz  
RGAIN 24



# <sup>1</sup>H & <sup>13</sup>C-NMR Spectra of 3pb:

C:\Girijesh K. Verma\DEAD-29A\_1H.als  
DEAD-29A 1H Mr. Girijesh

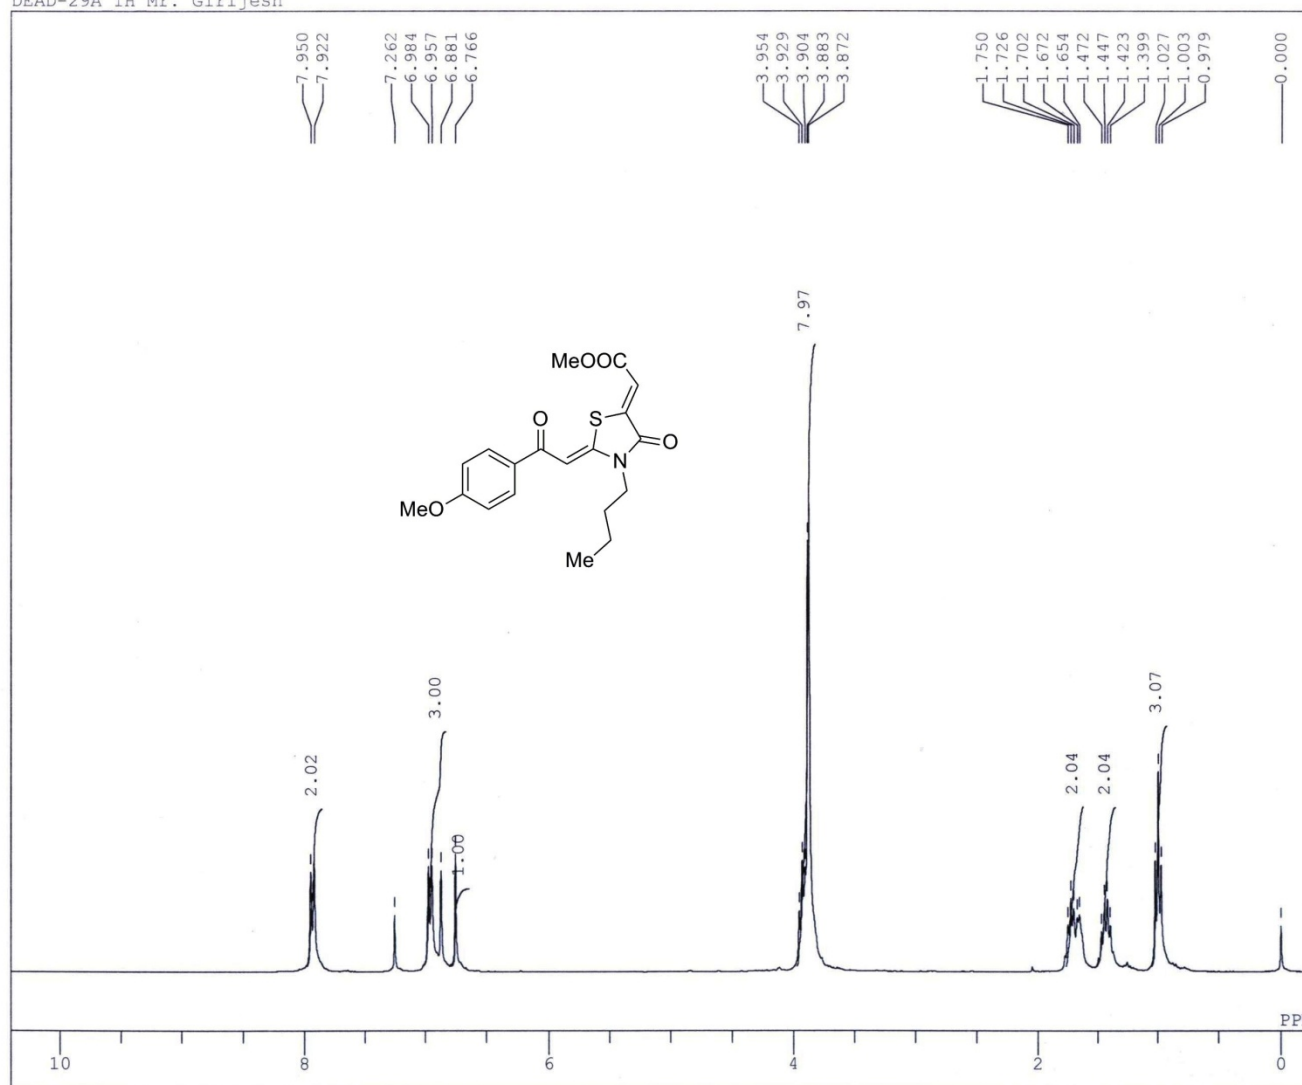

JEOL AL300 FTNMR  
CHEMISTRY DEPARTMENT  
Banaras Hindu University,  
VARANASI-221005

Operator : Nagendra Kumar  
Shishir Singh

DFILE C:\Girijesh K. Verma\DI  
COMNT DEAD-29A 1H Mr. Girije:  
DATIM Fri Aug 30 11:39:23 20:  
OBNUC 1H  
EXMOD NON  
OBFREQ 300.40 MHz  
OBSET 130.00 KHz  
OBFIN 1150.0 Hz  
POINT 32768  
FREQU 9505.7 Hz  
SCANS 16  
ACQTM 3.447 sec  
PD 1.547 sec  
PW1 5.2 us  
IRNUC 1H  
CTEMP 21.2 c  
SLVNT CDCL3  
EXREF 0.00 ppm  
BF 1.20 Hz  
RGAIN 17

C:\Girijesh K. Verma\DEAD-29A\_13C.als  
DEAD-29A 13C Mr. Girijesh

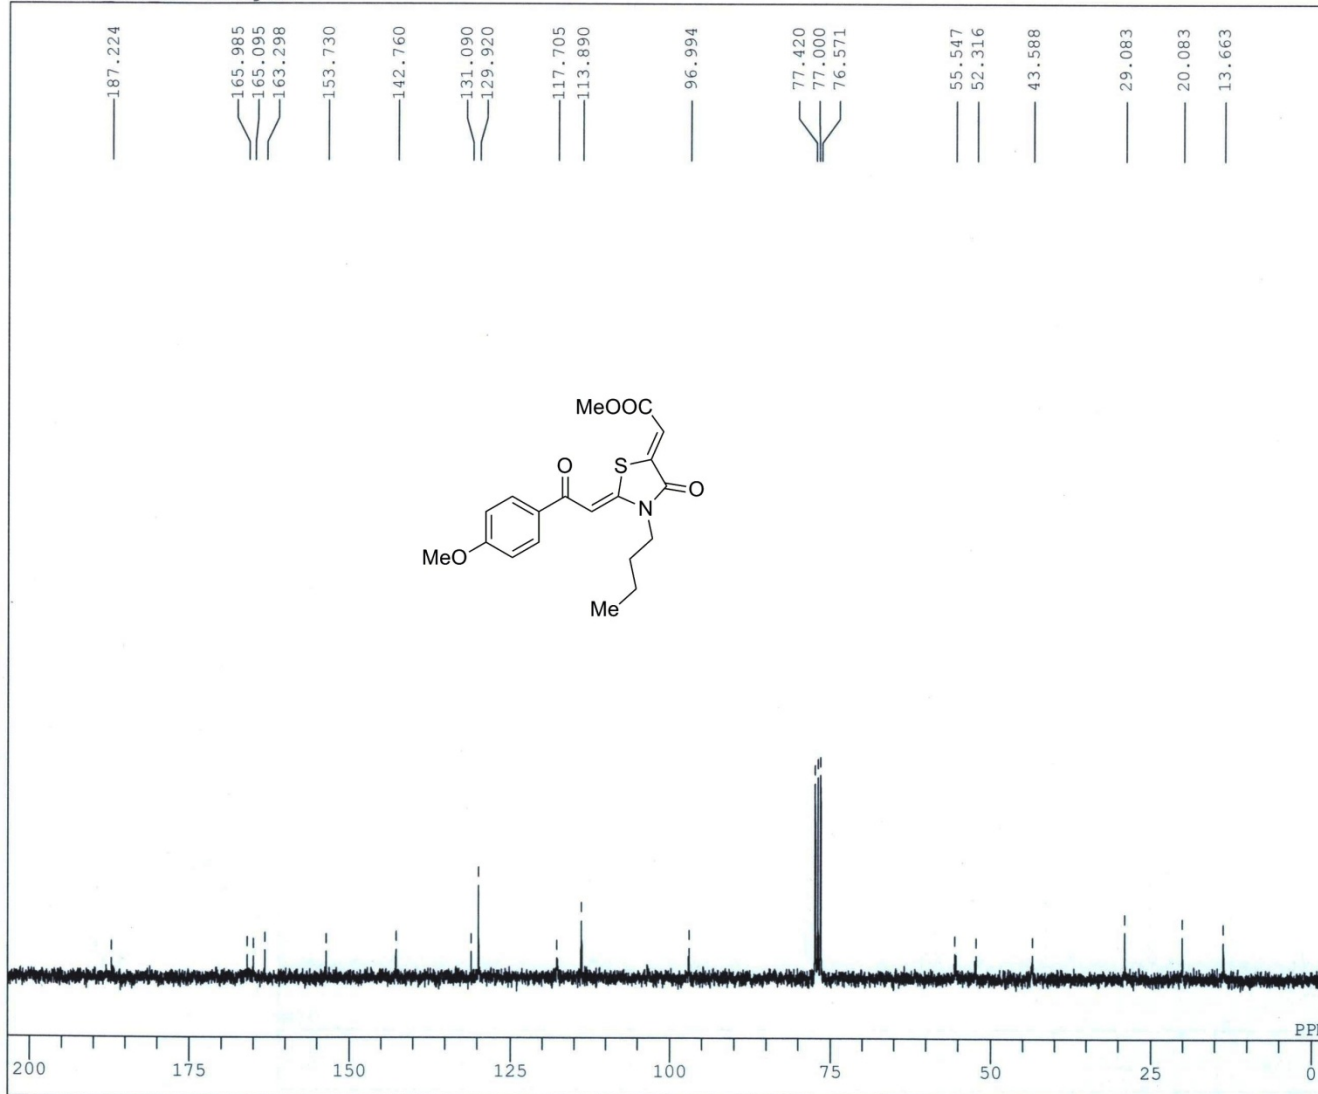

JEOL AL300 FTNMR  
CHEMISTRY DEPARTMENT  
Banaras Hindu University,  
VARANASI-221005

Operator : Nagendra Kumar  
Shishir Singh

DFILE C:\Girijesh K. Verma\DI  
COMNT DEAD-29A 13C Mr. Girije  
DATIM Fri Aug 30 11:51:09 20  
OBNUC 13C  
EXMOD BCM  
OBFRQ 75.45 MHz  
OBSET 124.00 KHz  
OBFIN 1840.0 Hz  
POINT 32768  
FREQU 20408.1 Hz  
SCANS 171  
ACQTM 1.606 sec  
PD 1.394 sec  
PW1 5.9 us  
IRNUC 1H  
CTEMP 23.3 c  
SLVNT CDCL3  
EXREF 77.00 ppm  
BF 1.20 Hz  
RGAIN 24

# <sup>1</sup>H & <sup>13</sup>C-NMR Spectra of 3qb:

C:\Girijesh K. Verma\DEAD-28A\_1H.als  
DEAD-28A 1H Mr. Girijesh

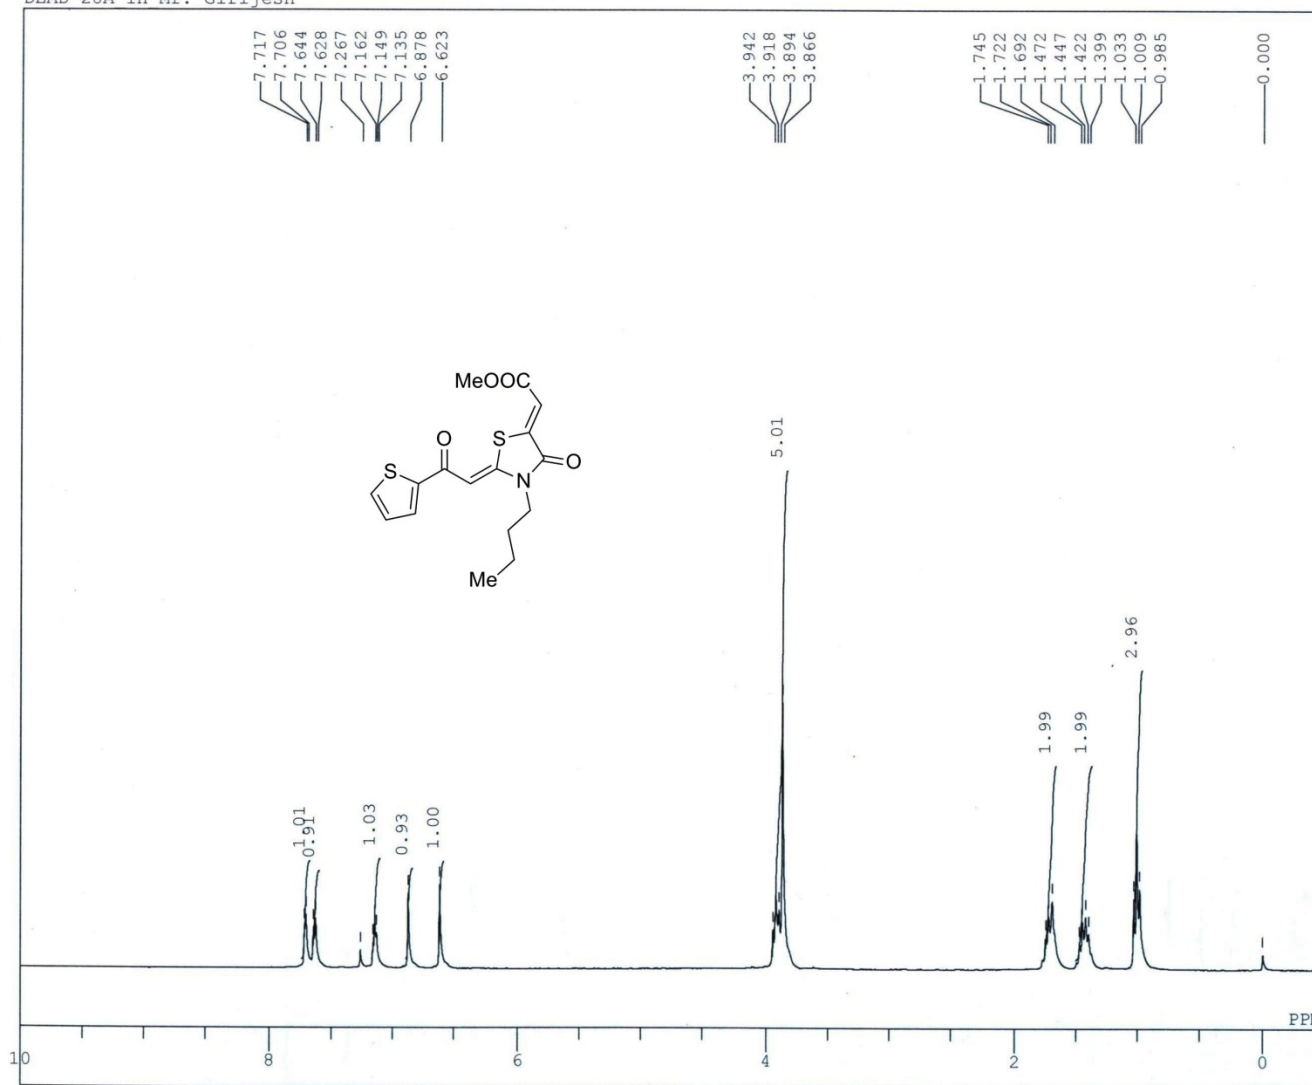

JEOL AL300 FTNMR  
CHEMISTRY DEPARTMENT  
Banaras Hindu University,  
VARANASI-221005

Operator : Nagendra Kumar  
Shishir Singh

DFILE C:\Girijesh K. Verma\DI  
COMNT DEAD-28A 1H Mr. Girije:  
DATIM Fri Aug 30 12:01:58 20:  
OBNUC 1H  
EXMOD NON  
OBFRQ 300.40 MHz  
OBSET 130.00 KHz  
OBFIN 1150.0 Hz  
POINT 32768  
FREQU 9505.7 Hz  
SCANS 8  
ACQTM 3.447 sec  
PD 1.547 sec  
PW1 5.2 us  
IRNUC 1H  
CTEMP 25.5 c  
SLVNT CDCL3  
EXREF 0.00 ppm  
BF 1.20 Hz  
RGAIN 16

C:\Girijesh K. Verma\DEAD-28A\_13C.als  
DEAD-28A 13C Mr. Girijesh

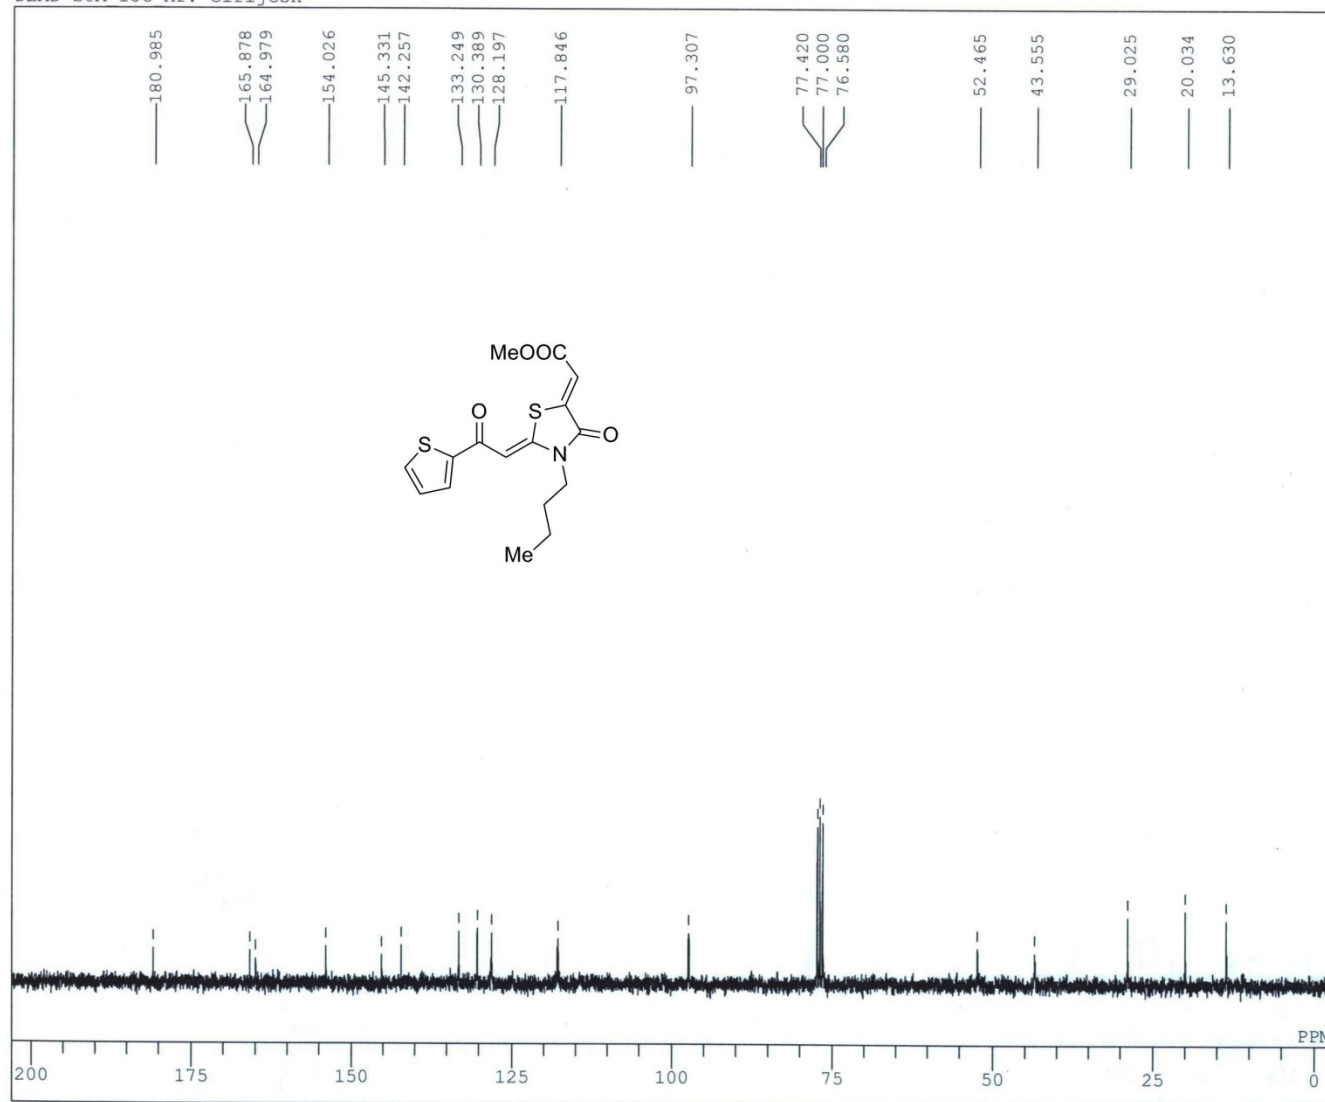

JEOL AL300 FTNMR  
CHEMISTRY DEPARTMENT  
Banaras Hindu University,  
VARANASI-221005

Operator : Nagendra Kumar  
Shishir Singh

DFILE C:\Girijesh K. Verma\DI  
COMNT DEAD-28A 13C Mr. Girijesh  
DATIM Fri Aug 30 11:58:42 2001  
OBNUC 13C  
EXMOD BCM  
OBFRQ 75.45 MHz  
OBSET 124.00 KHz  
OBFIN 1840.0 Hz  
POINT 32768  
FREQU 20408.1 Hz  
SCANS 91  
ACQTM 1.606 sec  
PD 1.394 sec  
PW1 5.9 us  
IRNUC 1H  
CTEMP 23.5 c  
SLVNT CDCL3  
EXREF 77.00 ppm  
BF 1.20 Hz  
RGAIN 23

# <sup>1</sup>H & <sup>13</sup>C-NMR Spectra of 3ra:

C:\Girijesh K. Verma\DEAD-27A\_1H\_als  
DEAD-27A 1H Mr.G.K.Verma

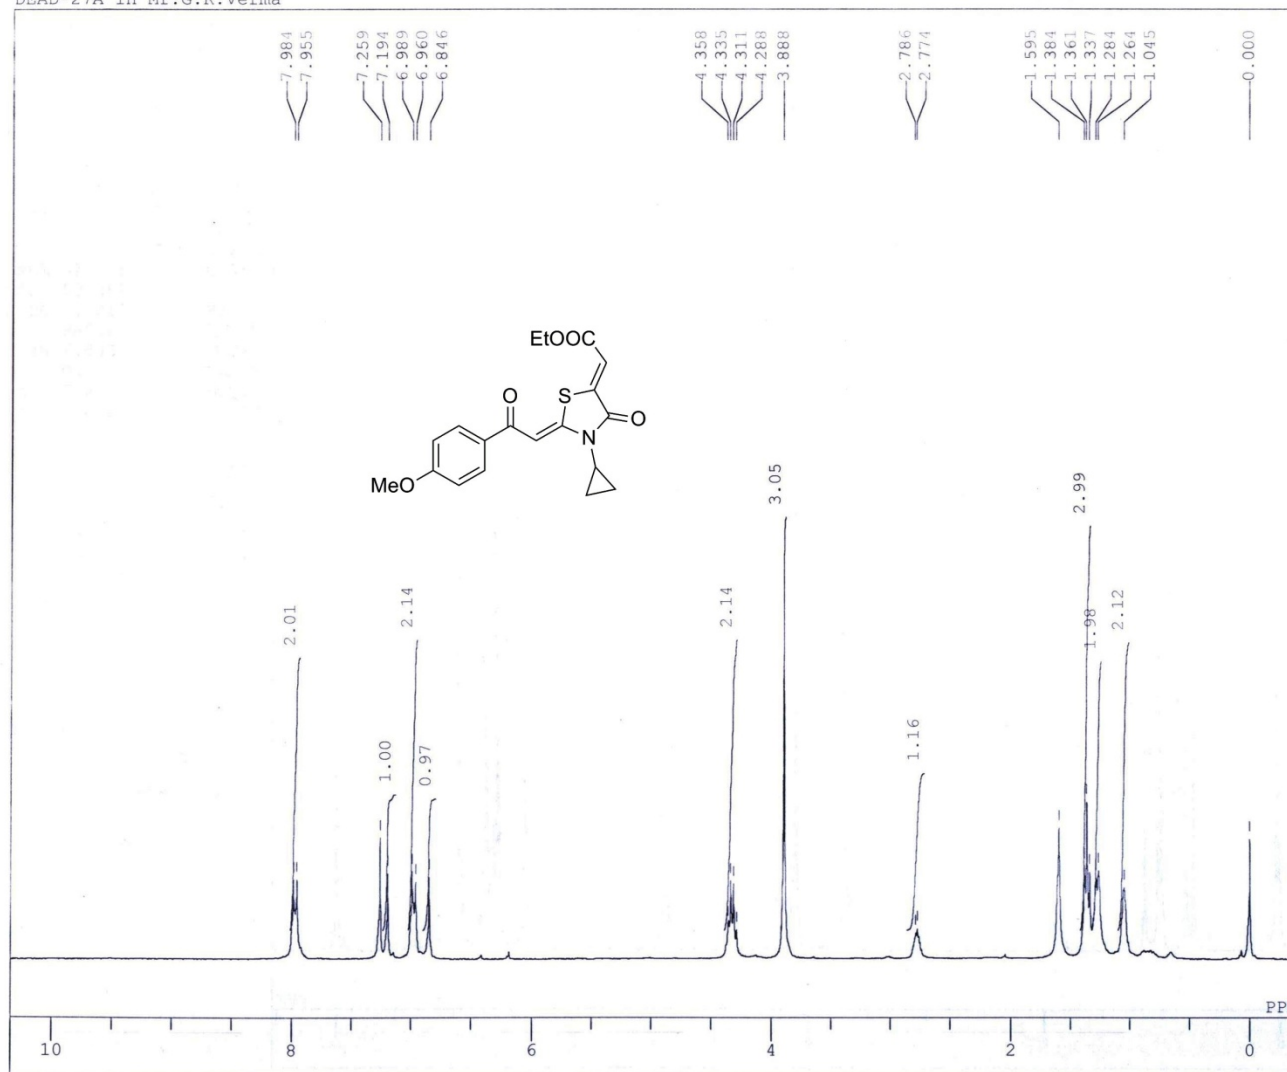

JEOL AL300 FTNMR  
CHEMISTRY DEPARTMENT  
Banaras Hindu University,  
VARANASI-221005

Operator : Nagendra Kumar  
Shishir Singh

DFILE C:\Girijesh K. Verma\DI  
COMNT DEAD-27A\_1H Mr.G.K.Verr  
DATIM Wed Aug 21 11:41:33 20  
OBNUC 1H  
EXMOD NON  
OBFRQ 300.40 MHz  
OBSET 130.00 KHz  
OBFIN 1150.0 Hz  
POINT 32768  
FREQU 9505.7 Hz  
SCANS 20  
ACQTM 3.447 sec  
PD 1.547 sec  
PW1 5.2 us  
IRNUC 1H  
CTEMP 26.3 c  
SLVNT CDCL3  
EXREF 0.00 ppm  
BF 1.20 Hz  
RGAIN 21

C:\Girijesh K. Verma\DEAD-27A\_13C.als  
DEAD-27A 13C Mr.G.K.Verma

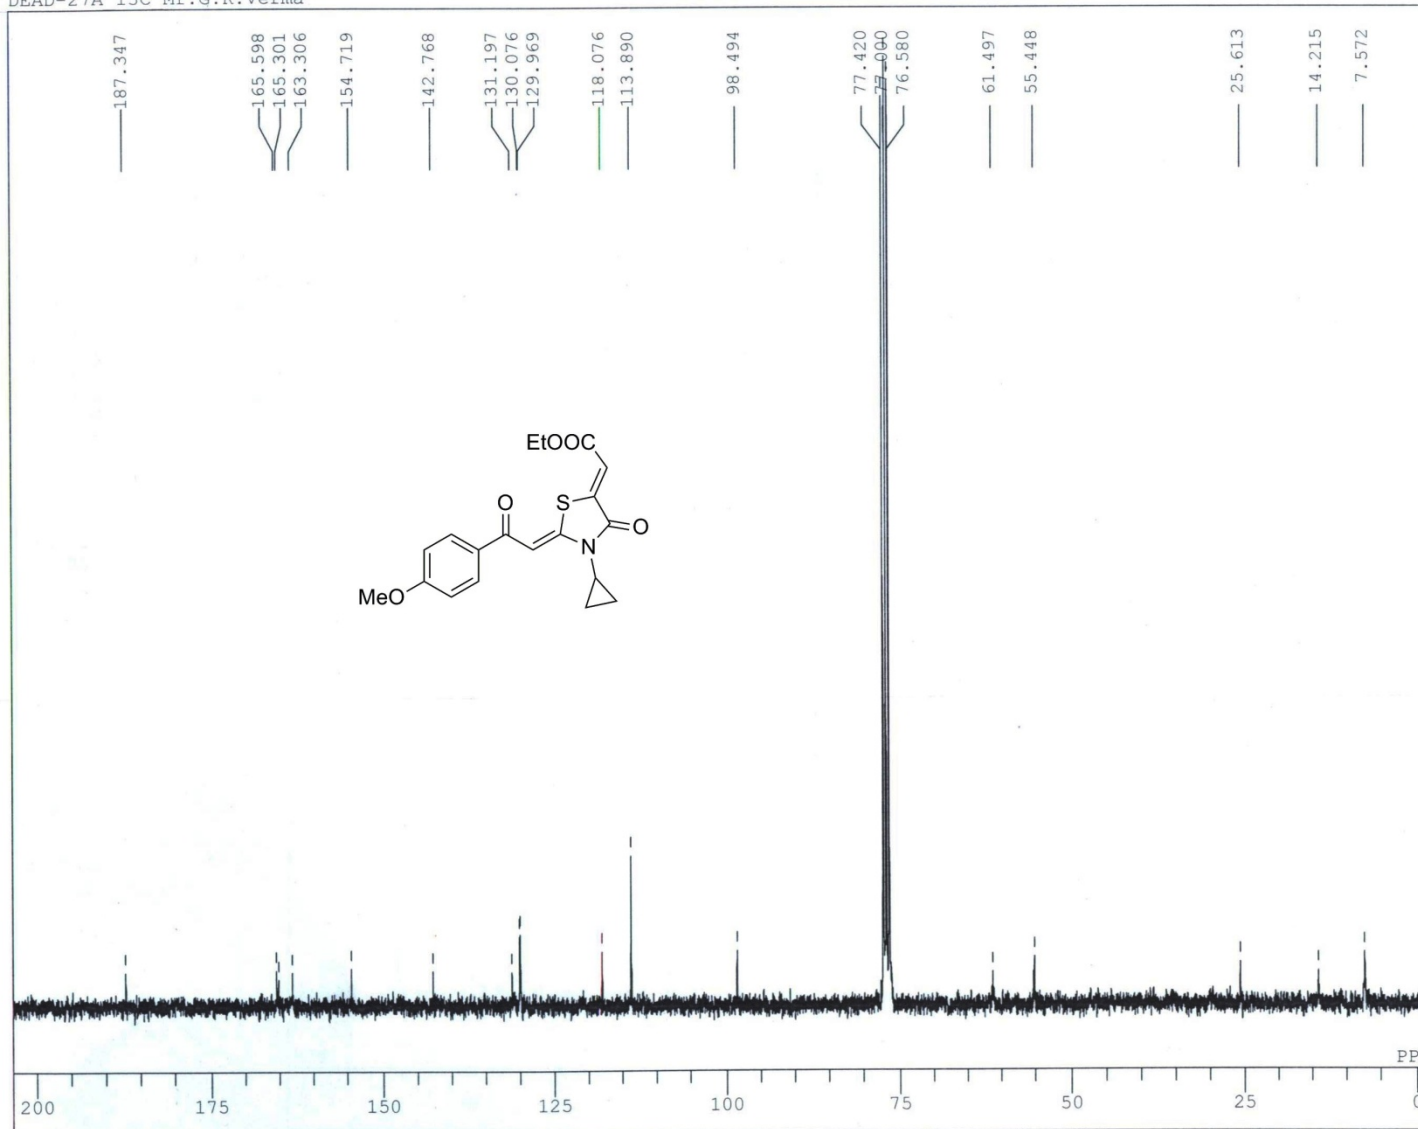

JEOL AL300 FTNMR  
CHEMISTRY DEPARTMENT  
Banaras Hindu University  
VARANASI-221005

Operator : Nagendra Kuma  
Shishir Singh

DFILE C:\Girijesh K. Ve  
COMNT DEAD-27A\_13C Mr.G  
DATIM Thu Aug 22 20:03:  
OBNUC 13C  
EXMOD BCM  
OBFRQ 75.45 MHz  
OBSET 124.00 KHz  
OBFIN 1840.0 Hz  
POINT 32768  
FREQU 20408.1 Hz  
SCANS 2000  
ACQTM 1.606 sec  
PD 1.394 sec  
PW1 5.9 us  
IRNUC 1H  
CTEMP 22.6 c  
SLVNT CDCL3  
EXREF 77.00 ppm  
BF 1.20 Hz  
RGAIN 24

# <sup>1</sup>H & <sup>13</sup>C-NMR Spectra of 3rb:

C:\Girijesh K. Verma\DEAD-26B\_1H\_als  
DEAD-26B 1H Mr.G.K.Verma

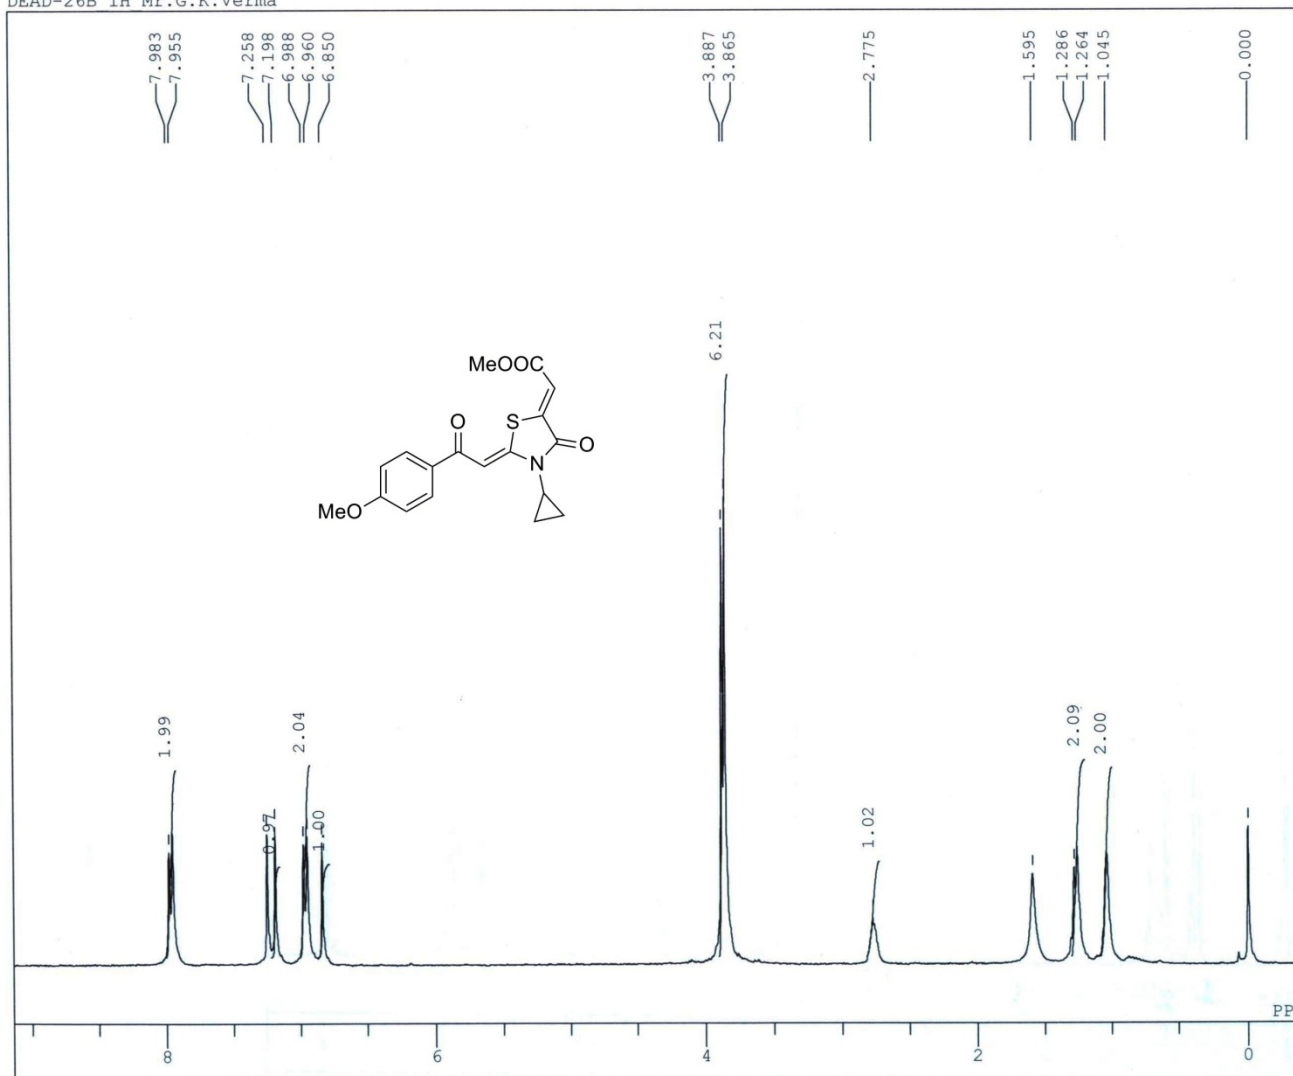

JEOL AL300 FTNMR  
CHEMISTRY DEPARTMENT  
Banaras Hindu University,  
VARANASI-221005

Operator : Nagendra Kumar  
Shishir Singh

DFILE C:\Girijesh K. Verma\DI  
COMNT DEAD-26B\_1H\_Mr.G.K.Verr  
DATIM Mon Aug 19 16:10:44 20  
OBNUC 1H  
EXMOD NON  
OBFRQ 300.40 MHz  
OBSET 130.00 KHz  
OBFIN 1150.0 Hz  
POINT 32768  
FREQU 9505.7 Hz  
SCANS 6  
ACQTM 3.447 sec  
PD 1.547 sec  
PW1 5.2 us  
IRNUC 1H  
CTEMP 23.3 c  
SLVNT CDCL3  
EXREF 0.00 ppm  
BF 1.20 Hz  
RGAIN 21

C:\Girijesh K. Verma\DEAD-26B\_13C.als  
DEAD-26B 13C Mr.G.K.Verma

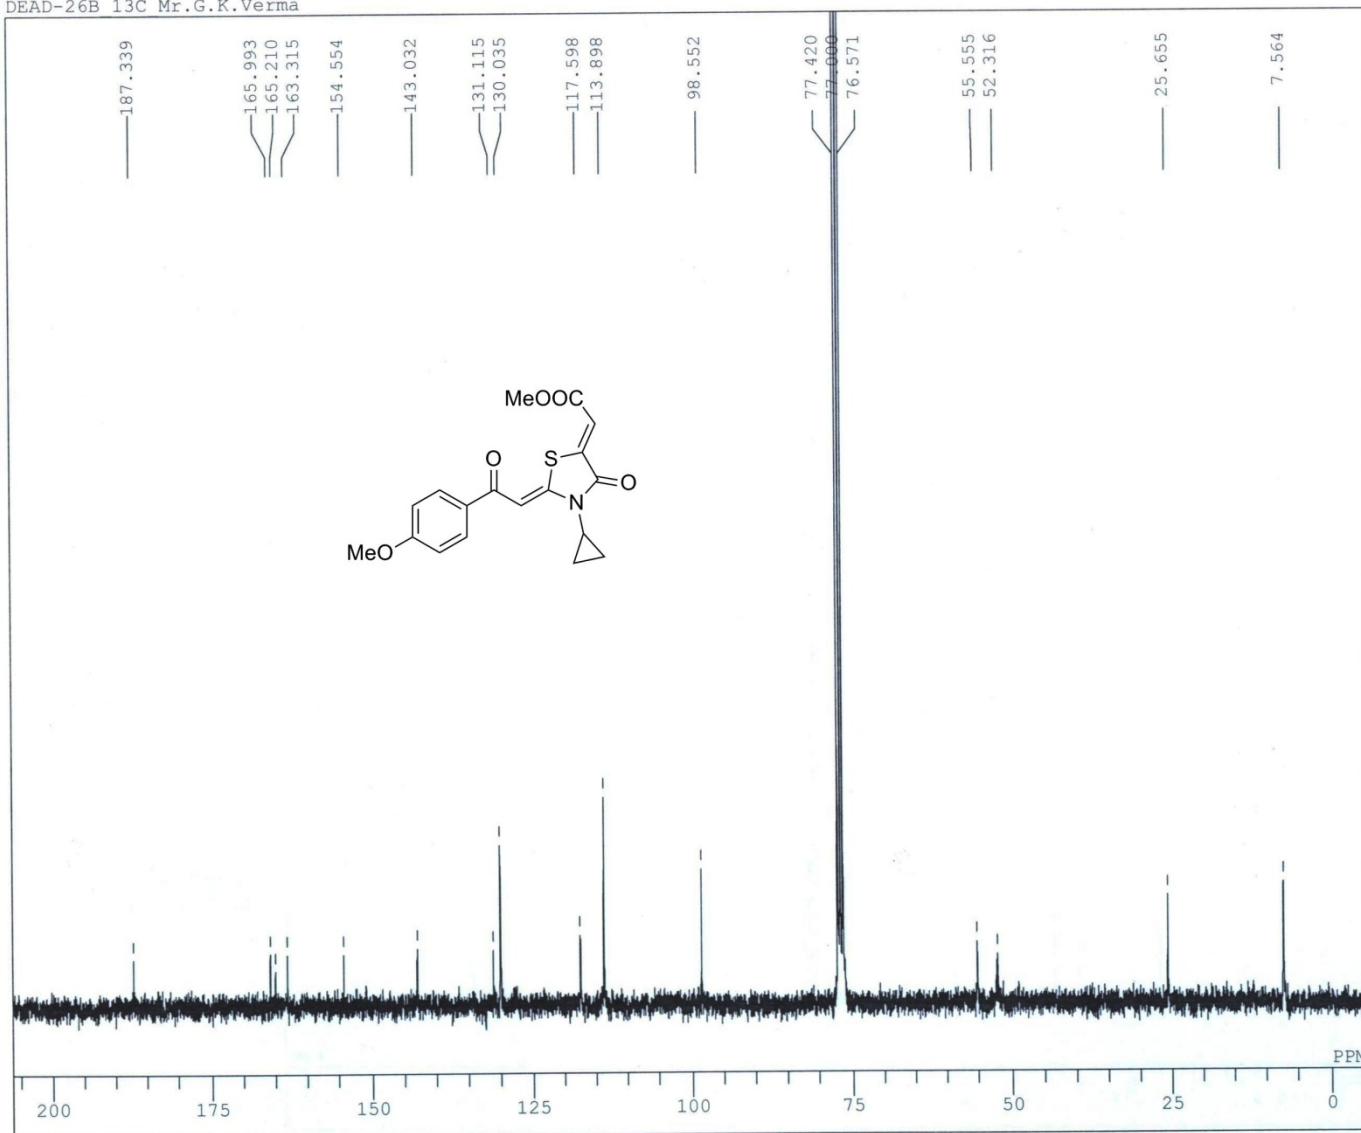

JEOL AL300 FTNMR  
CHEMISTRY DEPARTMENT  
Banaras Hindu University,  
VARANASI-221005

Operator : Nagendra Kumar  
Shishir Singh

DFILE C:\Girijesh K. Verma\DEAD-26B\_13C.MR  
COMNT DEAD-26B\_13C Mr.G.K.Verma  
DATIM Wed Aug 21 03:48:55 2003  
OBNUC 13C  
EXMOD BCM  
OBFRQ 75.45 MHz  
OBSET 124.00 KHz  
OBFIN 1840.0 Hz  
POINT 32768  
FREQU 20408.1 Hz  
SCANS 2000  
ACQTM 1.606 sec  
PD 1.394 sec  
PW1 5.9 us  
IRNUC 1H  
CTEMP 21.9 c  
SLVNT CDCL3  
EXREF 77.00 ppm  
BF 1.20 Hz  
RGAIN 22



# <sup>1</sup>H & <sup>13</sup>C-NMR Spectra of 3sb:

C:\Girijesh K. Verma\DEAD-36A\_1H.als  
DEAD-36A 1H Mr. Girijesh

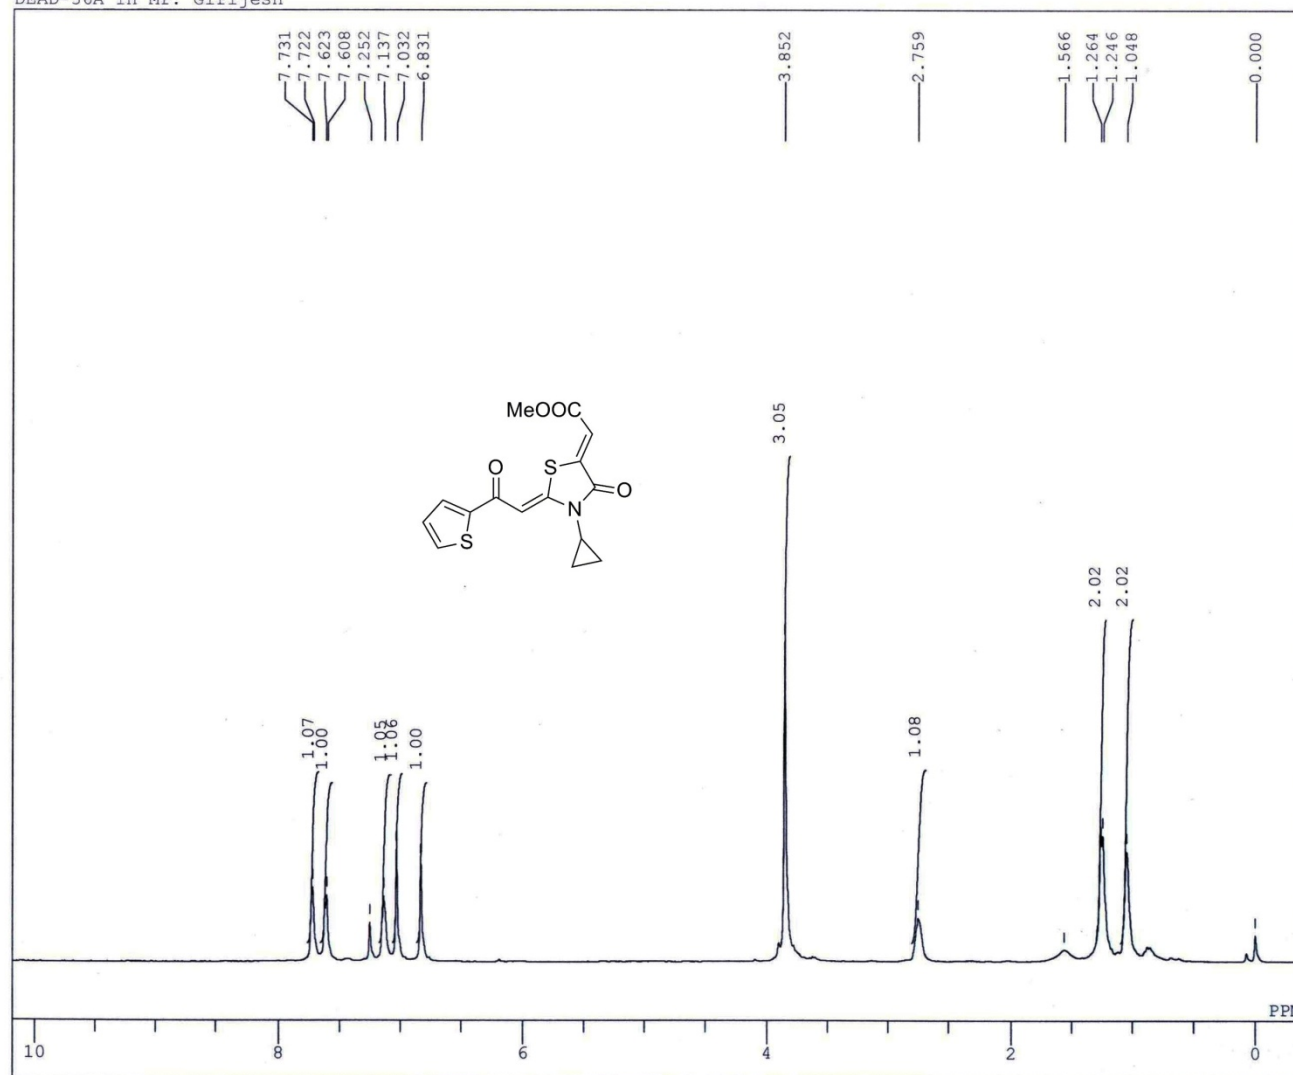

JEOL AL300 FTNMR  
CHEMISTRY DEPARTMENT  
Banaras Hindu University,  
VARANASI-221005

Operator : Nagendra Kumar  
Shishir Singh

DFILE C:\Girijesh K. Verma\DEAD-36A\_1H.als  
COMNT DEAD-36A 1H Mr. Girijesh  
DATIM Fri Sep 13 10:45:44 2013  
OBNUC 1H  
EXMOD NON  
OBFRQ 300.40 MHz  
OBSET 130.00 KHz  
OBFIN 1150.0 Hz  
POINT 32768  
FREQU 9505.7 Hz  
SCANS 32  
ACQTM 3.447 sec  
PD 1.547 sec  
PW1 5.2 us  
IRNUC 1H  
CTEMP 50.3 c  
SLVNT CDCL3  
EXREF 0.00 ppm  
BF 1.20 Hz  
RGAIN 19

C:\WINNMR98\COMMON\\_DEFAULT.ALS  
DEAD-36A 13C Mr. Girijesh

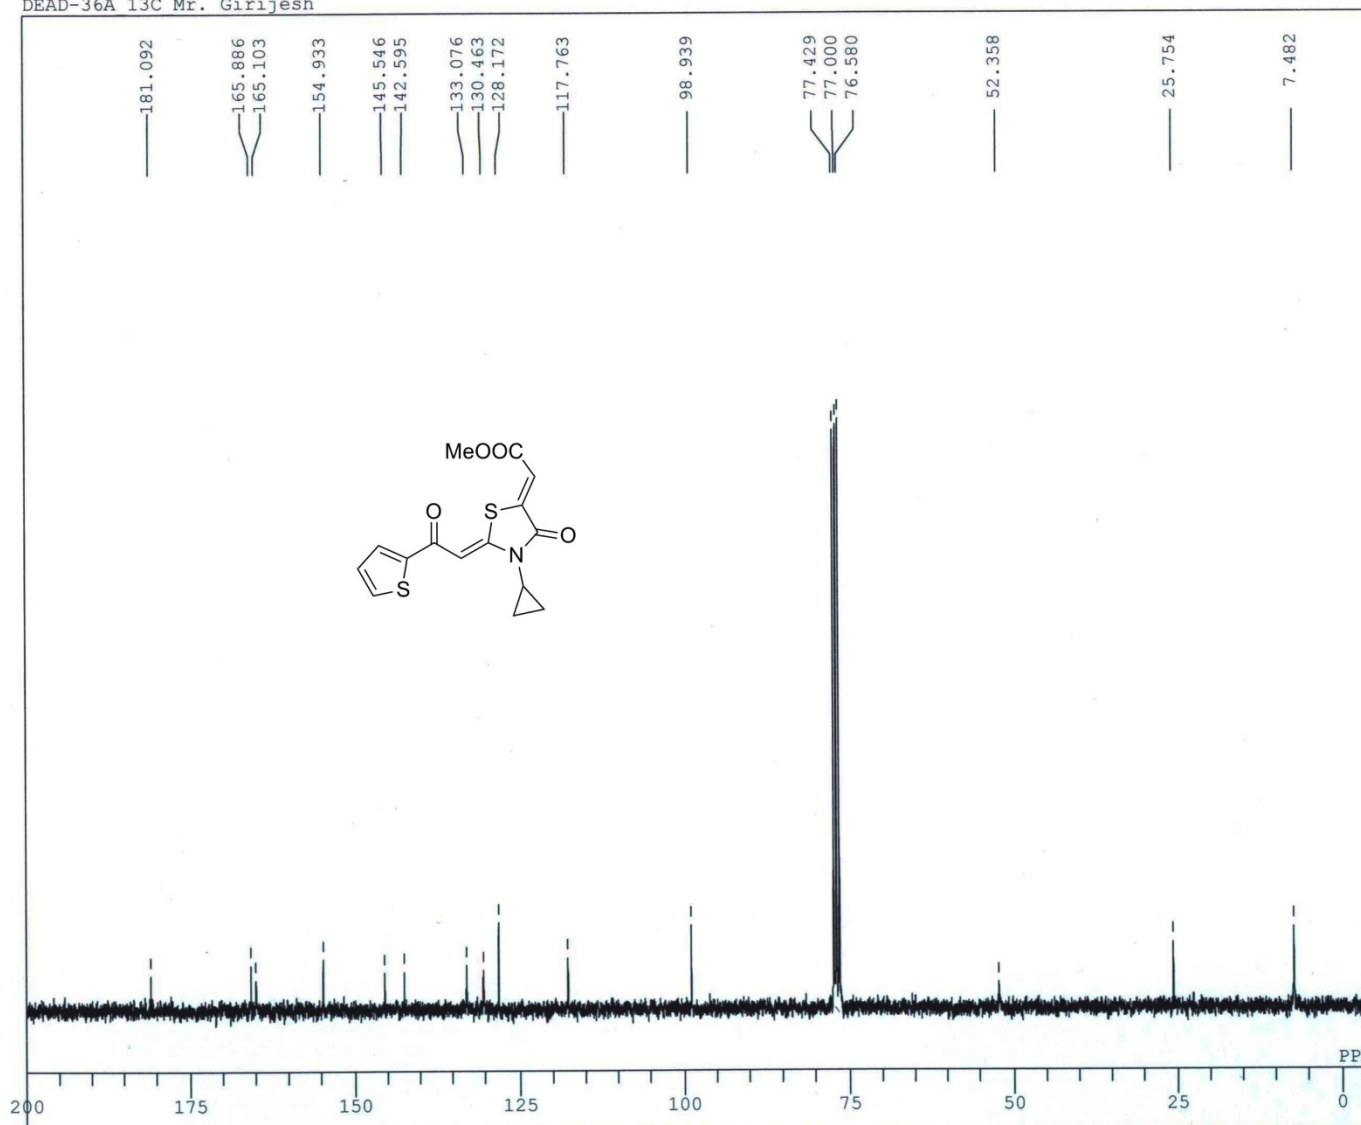

JEOL AL300 FTNMR  
CHEMISTRY DEPARTMENT  
Banaras Hindu University,  
VARANASI-221005

Operator : Nagendra Kumar  
Shishir Singh

DFILE C:\WINNMR98\COMMON\\_DEI  
COMNT DEAD-36A 13C Mr. Girijesh  
DATIM Fri Sep 13 10:41:13 2003  
OBNUC 13C  
EXMOD BCM  
OBFRQ 75.45 MHz  
OBSET 124.00 KHz  
OBFIN 1840.0 Hz  
POINT 32768  
FREQU 20408.1 Hz  
SCANS 337  
ACQTM 1.606 sec  
PD 1.394 sec  
PW1 5.9 us  
IRNUC 1H  
CTEMP 50.3 c  
SLVNT CDCL3  
EXREF 77.00 ppm  
BF 1.20 Hz  
RGAIN 24

# <sup>1</sup>H & <sup>13</sup>C-NMR Spectra of 3tb:

C:\Girijesh K. Verma\DEAD-32A\_1H.als  
DEAD-32A 1H Mr.G.K.Verma

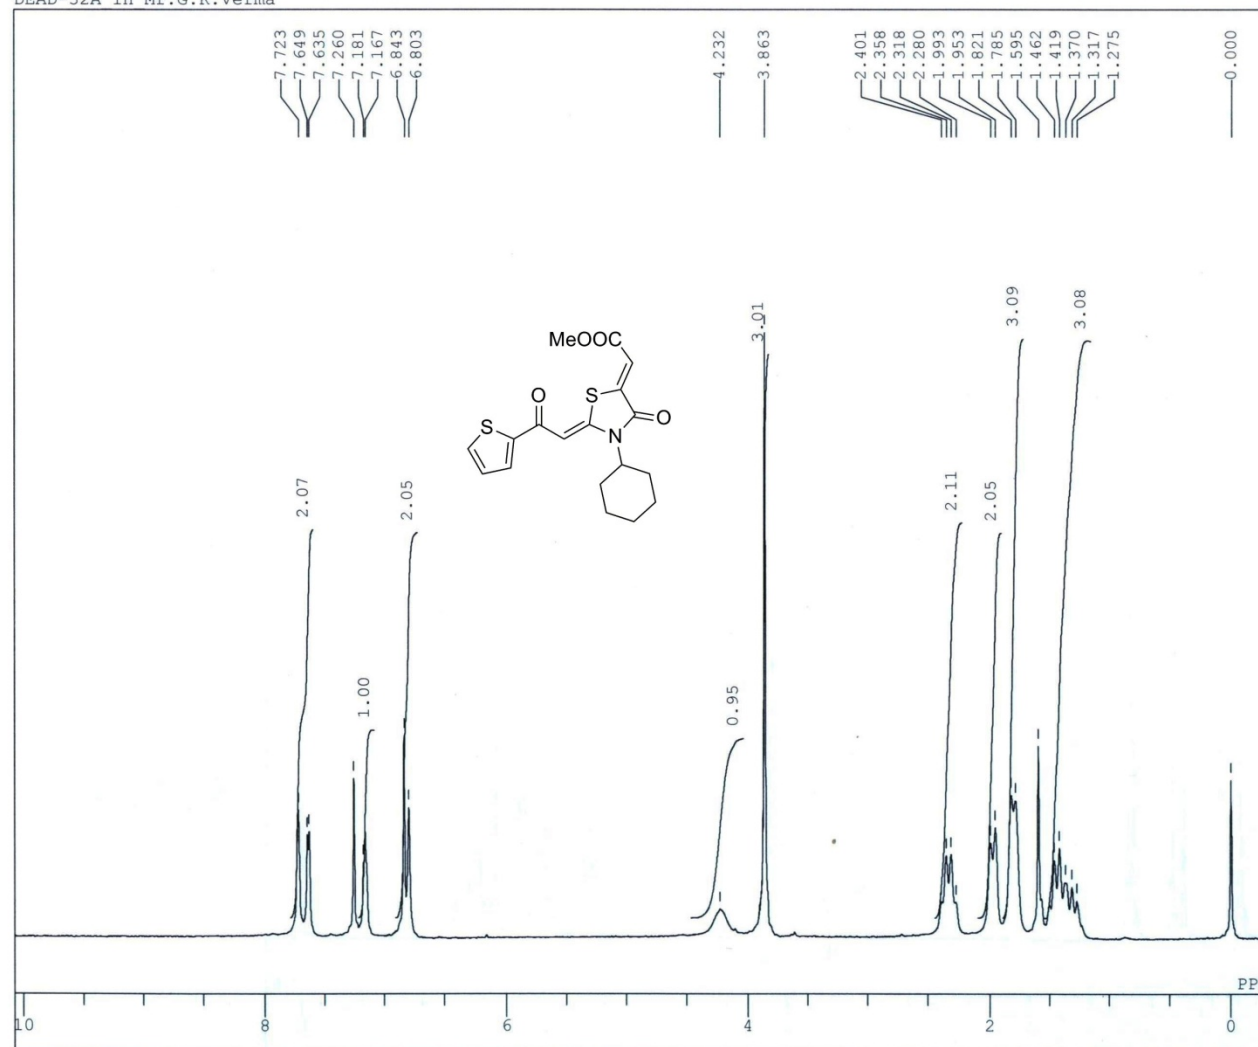

JEOL AL300 FTNMR  
CHEMISTRY DEPARTMENT  
Banaras Hindu University,  
VARANASI-221005

Operator : Nagendra Kumar  
Shishir Singh

DFILE C:\Girijesh K. Verma\DI  
COMNT DEAD-32A\_1H\_Mr.G.K.Verr  
DATIM Tue Sep 03 15:50:16 20:  
OBNUC 1H  
EXMOD NON  
OBFREQ 300.40 MHz  
OBSET 130.00 KHz  
OBFIN 1150.0 Hz  
POINT 32768  
FREQU 6016.8 Hz  
SCANS 16  
ACQTM 5.446 sec  
PD 1.547 sec  
PW1 5.6 us  
IRNUC 1H  
CTEMP 22.7 c  
SLVNT CDCL3  
EXREF 0.00 ppm  
BF 1.20 Hz  
RGAIN 21

C:\WINNMR98\COMMON\_DEFAULT.ALS  
DEAD-32A 13C Mr. Girijesh

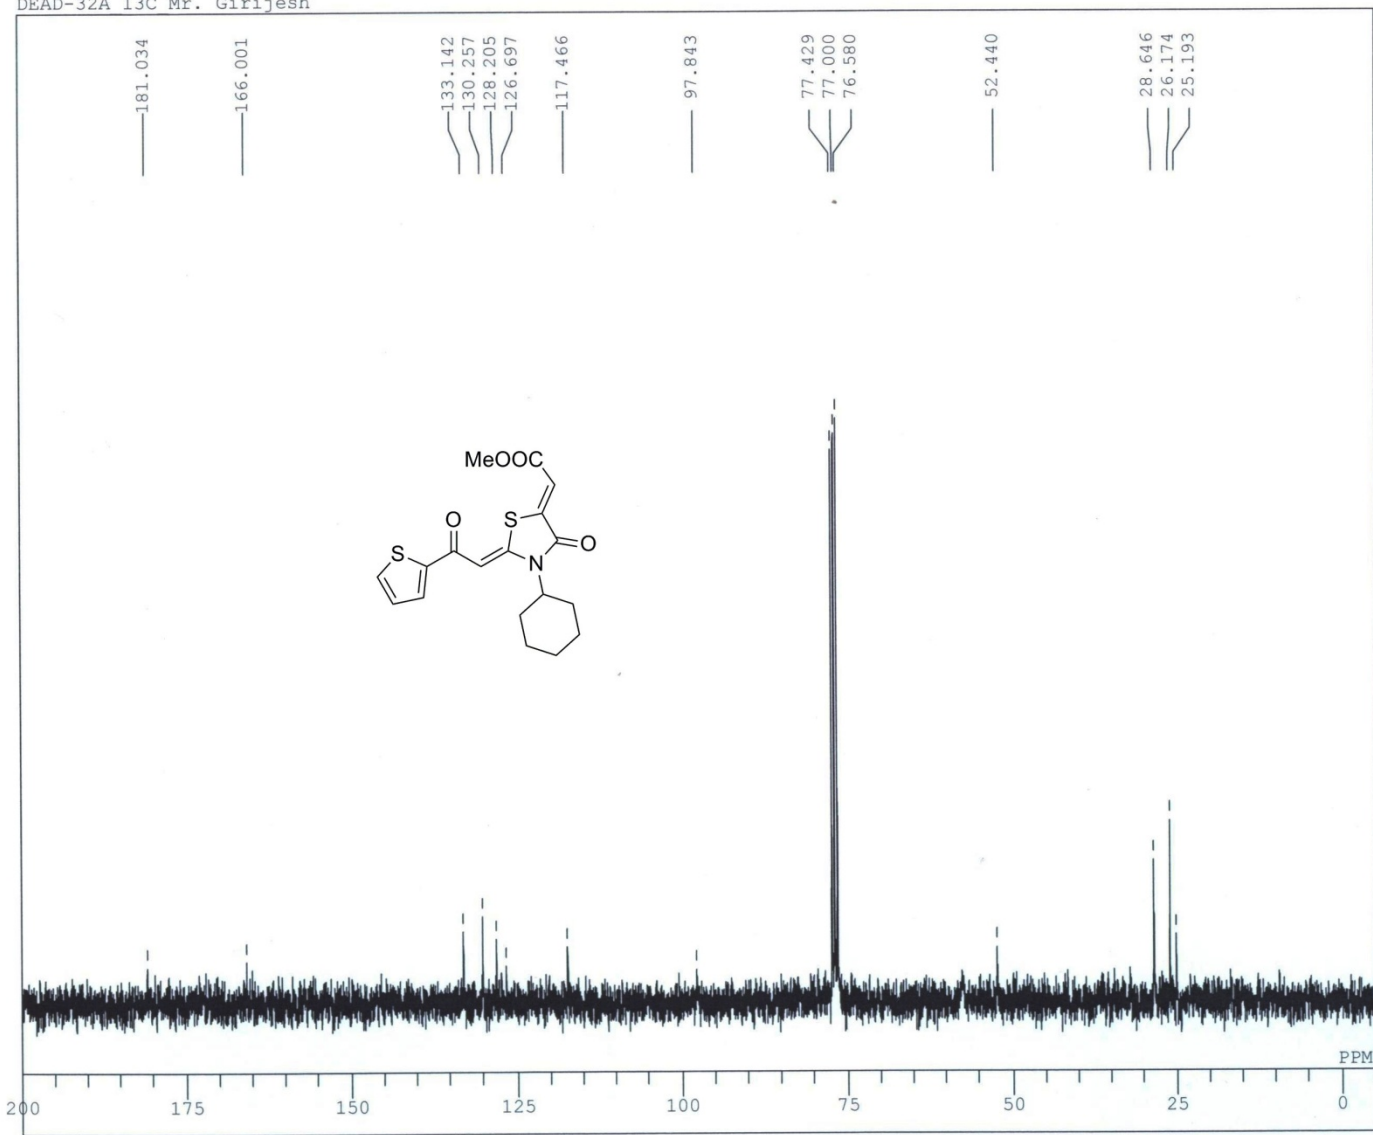

JEOL AL300 FTNMR  
CHEMISTRY DEPARTMENT  
Banaras Hindu University,  
VARANASI-221005

Operator : Nagendra Kumar  
Shishir Singh

DFILE C:\WINNMR98\COMMON\DEI  
COMNT DEAD-32A 13C Mr. Girijesh  
DATIM Wed Sep 04 14:41:18 2003  
OBNUC 13C  
EXMOD BCM  
OBFRQ 75.45 MHz  
OBSET 124.00 KHz  
OBFIN 1840.0 Hz  
POINT 32768  
FREQU 20408.1 Hz  
SCANS 221  
ACQTM 1.606 sec  
PD 1.394 sec  
PW1 5.9 us  
IRNUC 1H  
CTEMP 26.8 c  
SLVNT CDCL3  
EXREF 77.00 ppm  
BF 1.20 Hz  
RGAIN 24

# <sup>1</sup>H & <sup>13</sup>C-NMR Spectra of 3ub:

C:\Girijesh K. Verma\DEAD-30A\_1H.als  
DEAD-30A 1H Mr. Girijesh

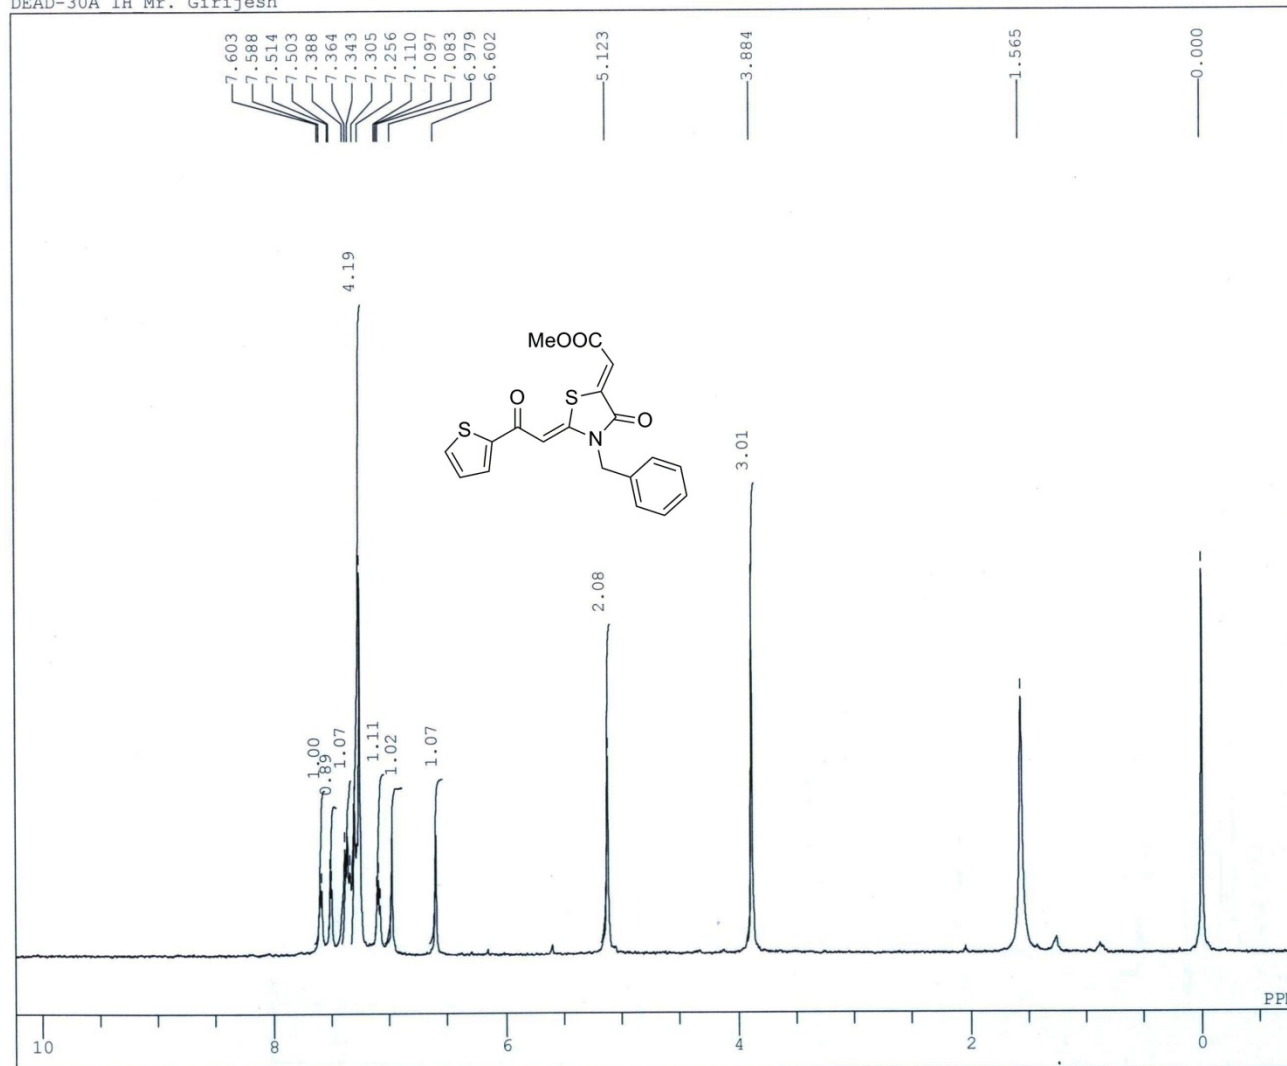

JEOL AL300 FTNMR  
CHEMISTRY DEPARTMENT  
Banaras Hindu University,  
VARANASI-221005

Operator : Nagendra Kumar  
Shishir Singh

DFILE C:\Girijesh K. Verma\DI  
COMNT DEAD-30A\_1H Mr. Girije  
DATIM Mon Sep 02 16:01:42 20  
OBNUC 1H  
EXMOD NON  
OBFREQ 300.40 MHz  
OBSET 130.00 KHz  
OBFIN 1150.0 Hz  
POINT 32768  
FREQU 9505.7 Hz  
SCANS 16  
ACQTM 3.447 sec  
PD 1.547 sec  
PW1 5.2 us  
IRNUC 1H  
CTEMP 25.3 c  
SLVNT CDCL3  
EXREF 0.00 ppm  
BF 1.20 Hz  
RGAIN 24

C:\Girijesh K. Verma\DEAD-30B\_13C.als  
DEAD-30B 13C Mr. G. K. Verma

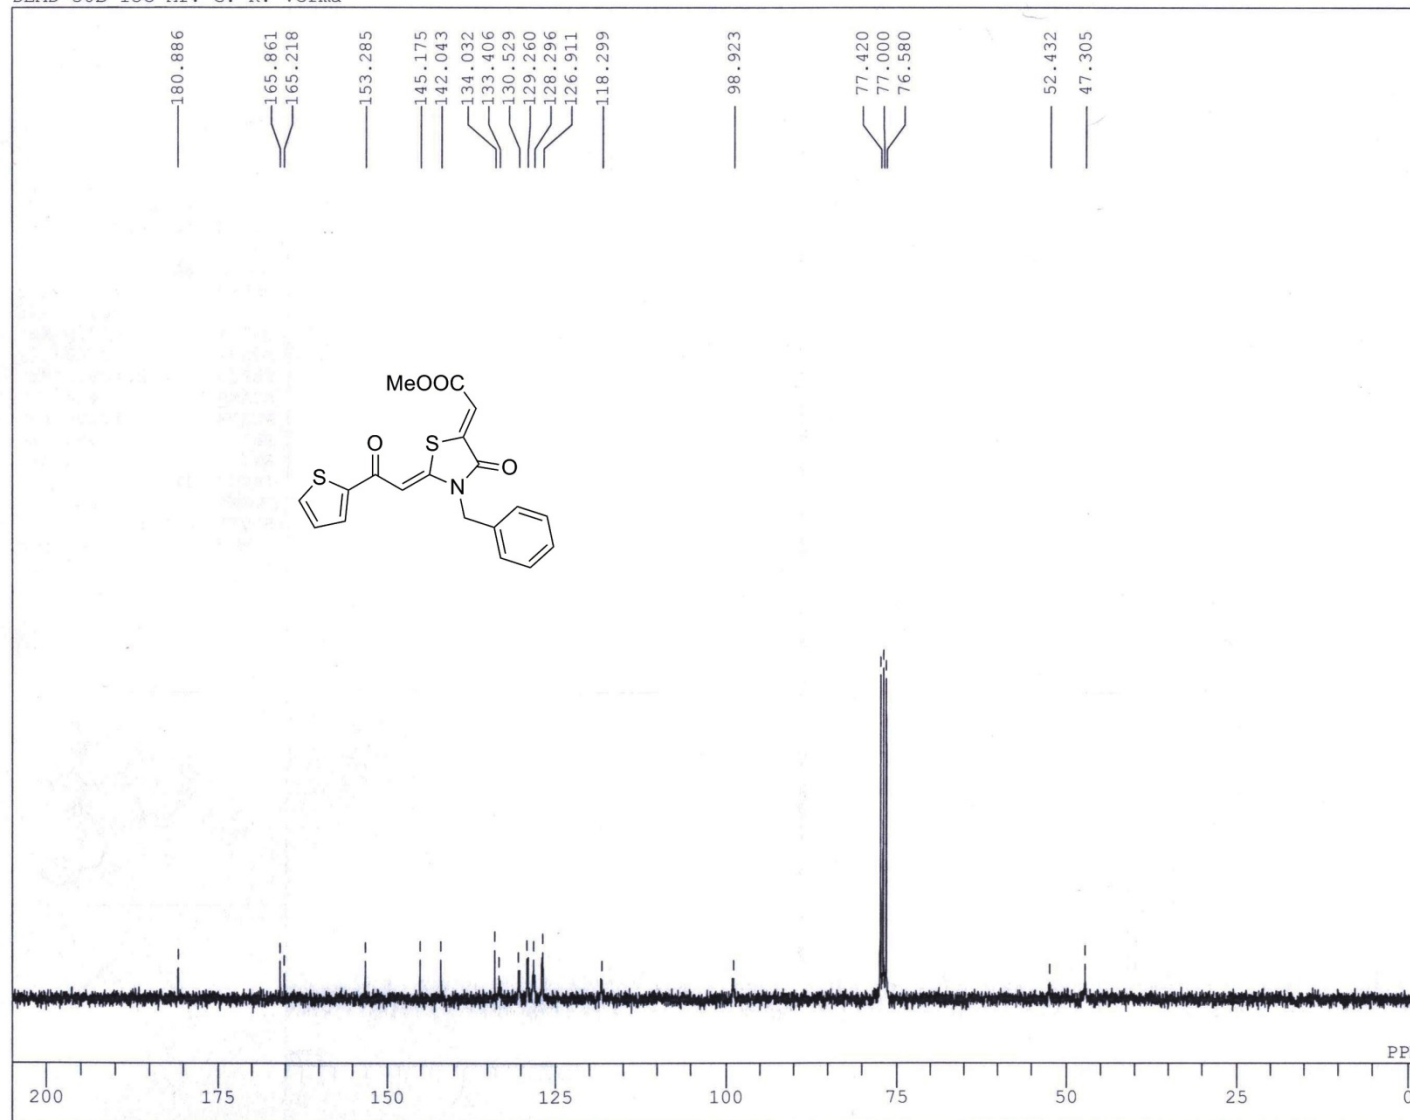

JEOL AL300 FTNMR  
CHEMISTRY DEPARTMENT  
Banaras Hindu University  
VARANASI-221005

Operator : Nagendra Kuma  
Shishir Singh

DFILE C:\Girijesh K. Ve  
COMNT DEAD-30B\_13C Mr. '  
DATIM Fri Nov 22 17:13:  
OBNUC 13C  
EXMOD BCM  
OBFRQ 75.45 MHz  
OBSET 124.00 KHz  
OBFIN 1840.0 Hz  
POINT 32768  
FREQU 20408.1 Hz  
SCANS 404  
ACQTM 1.606 sec  
PD 1.394 sec  
PW1 5.9 us  
IRNUC 1H  
CTEMP 22.9 c  
SLVNT CDCL3  
EXREF 77.00 ppm  
BF 1.20 Hz  
RGAIN 15

# <sup>1</sup>H & <sup>13</sup>C-NMR Spectra of 3vb:

C:\Girijesh K. Verma\DEAD-33A\_1H.als  
DEAD-33A 1H Mr.g.K.Verma

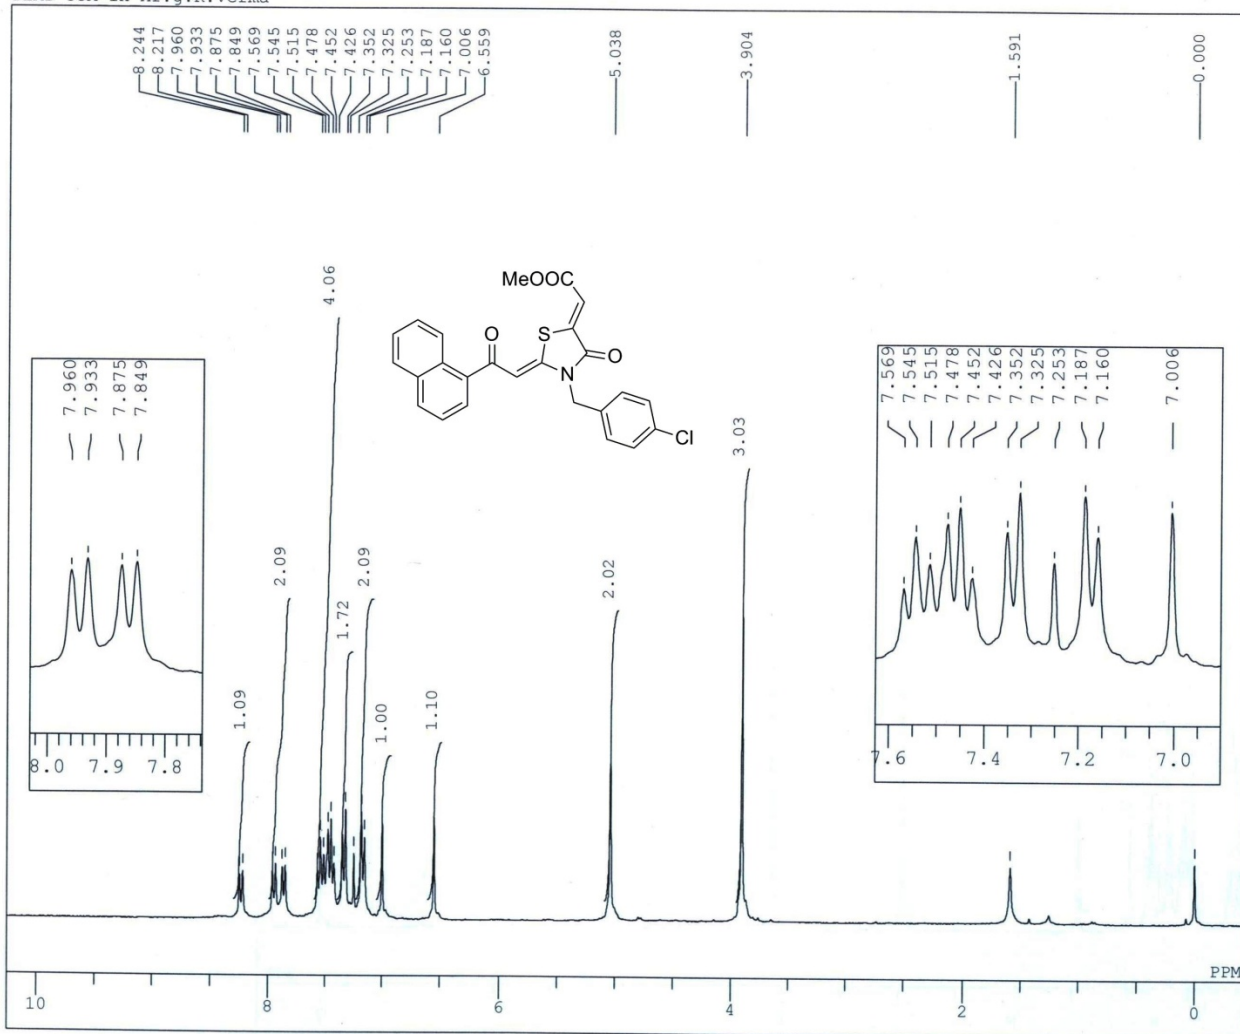

JEOL AL300 FTNMR  
CHEMISTRY DEPARTMENT  
Banaras Hindu University,  
VARANASI-221005

Operator : Nagendra Kumar  
Shishir Singh

DFILE C:\Girijesh K. Verma\DI  
COMNT DEAD-33A\_1H\_Mr.g.K.Verr  
DATIM Tue Sep 03 16:46:31 20:  
OBNUC 1H  
EXMOD NON  
OBFRQ 300.40 MHz  
OBSET 130.00 KHz  
OBFIN 1150.0 Hz  
POINT 32768  
FREQU 9505.7 Hz  
SCANS 8  
ACQTM 3.447 sec  
PD 1.547 sec  
PW1 5.2 us  
IRNUC 1H  
CTEMP 25.1 c  
SLVNT CDCL3  
EXREF 0.00 ppm  
BF 1.20 Hz  
RGAIN 20

C:\Girijesh K. Verma\DEAD-33A\_13C.als  
 DEAD-33A\_13C Mr. G.K. Verma

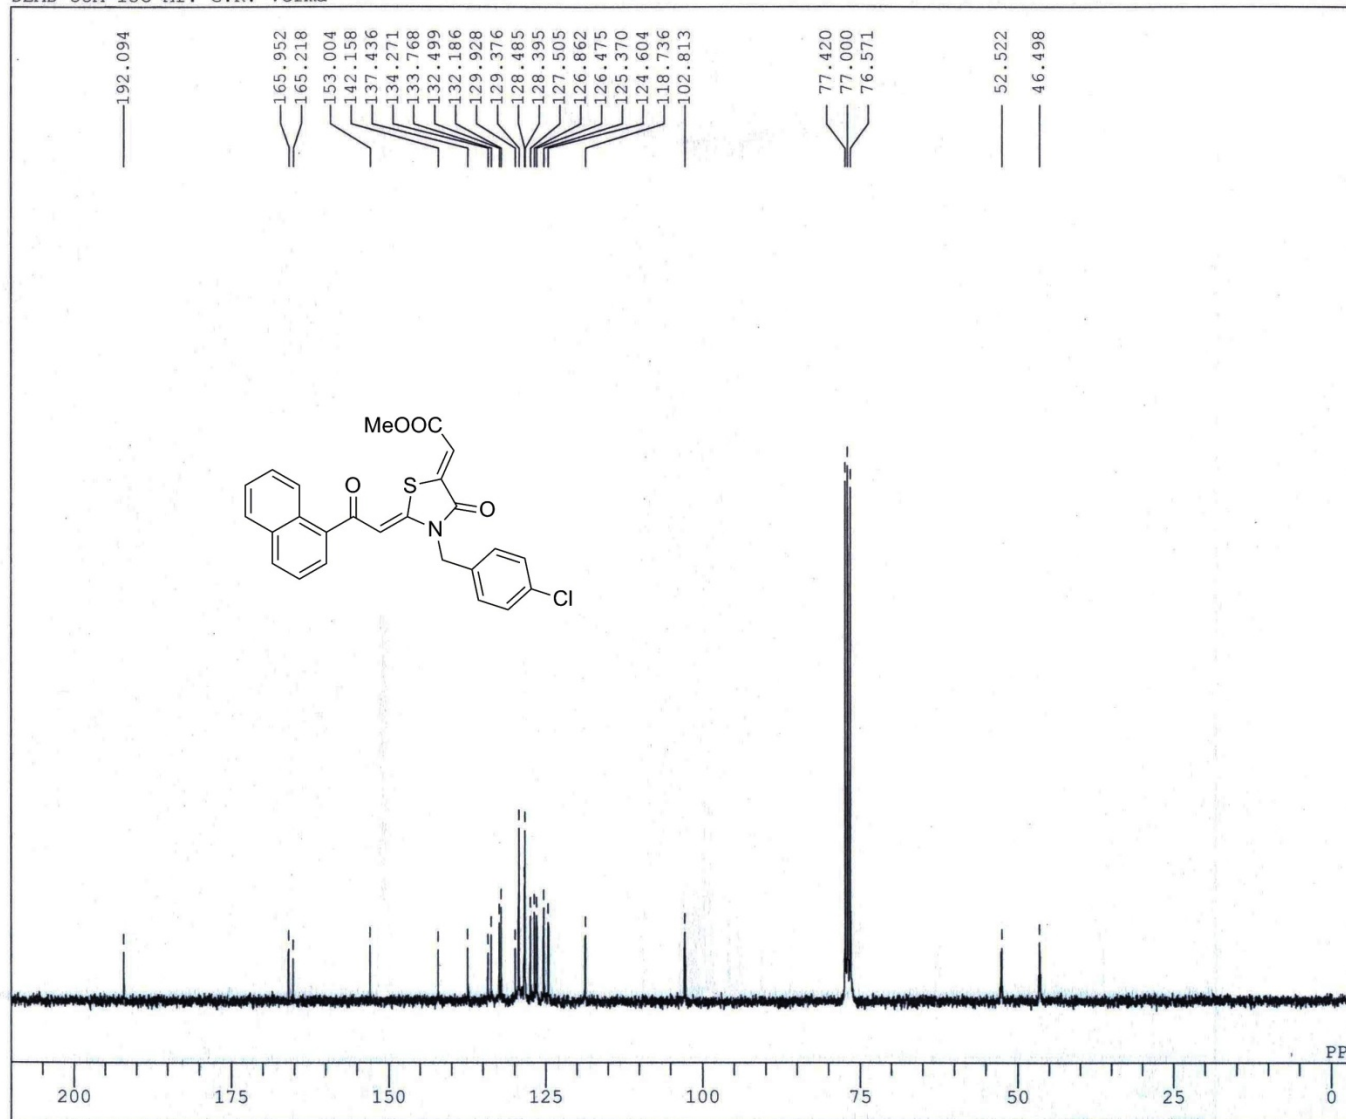

JEOL AL300 FTNMR  
 CHEMISTRY DEPARTMENT  
 Banaras Hindu University,  
 VARANASI-221005

Operator : Nagendra Kumar  
 Shishir Singh

DFILE C:\Girijesh K. Verma\DI  
 COMNT DEAD-33A\_13C Mr. G.K. \  
 DATIM Thu Sep 05 06:29:15 20  
 OBNUC 13C  
 EXMOD BCM  
 OBFREQ 75.45 MHz  
 OBSET 124.00 KHz  
 OBFIN 1840.0 Hz  
 POINT 32768  
 FREQU 20408.1 Hz  
 SCANS 2500  
 ACQTM 1.606 sec  
 PD 1.394 sec  
 PW1 5.9 us  
 IRNUC 1H  
 CTEMP 22.7 c  
 SLVNT CDCL3  
 EXREF 77.00 ppm  
 BF 1.20 Hz  
 RGAIN 24



# <sup>1</sup>H & <sup>13</sup>C-NMR Spectra of 3wb:

C:\Girijesh K. Verma\DEAD-34A 1H.als  
DEAD-34A 1H Mr. Girijesh K. Verma

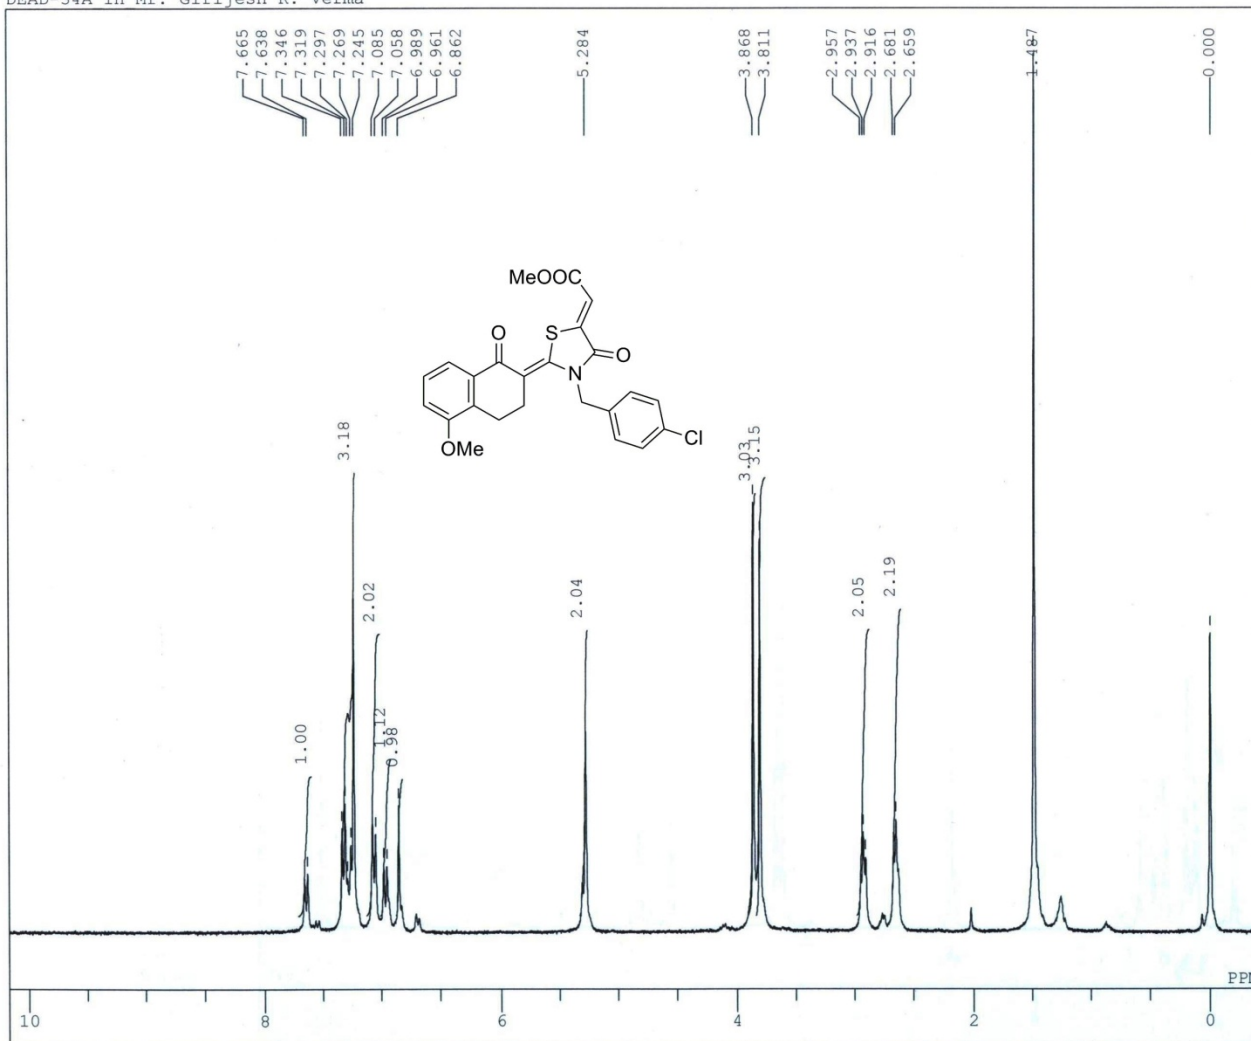

JEOL AL300 FTNMR  
CHEMISTRY DEPARTMENT  
Banaras Hindu University,  
VARANASI-221005

Operator : Nagendra Kumar  
Shishir Singh

DFILE C:\Girijesh K. Verma\DI  
COMNT DEAD-34A 1H Mr. Girije  
DATIM Mon Sep 09 17:35:20 20  
OBNUC 1H  
EXMOD NON  
OBFRQ 300.40 MHz  
OBSET 130.00 KHz  
OBFIN 1150.0 Hz  
POINT 32768  
FREQU 9505.7 Hz  
SCANS 47  
ACQTM 3.447 sec  
PD 1.547 sec  
PWL 5.2 us  
IRNUC 1H  
CTEMP 50.3 c  
SLVNT CDCL3  
EXREF 0.00 ppm  
BF 0.12 Hz  
RGAIN 23

C:\WINNMR98\Data\DEAD-34B\_1H2BCM\_E1.als  
DEAD-34B 1H Mr.G.K.Verma

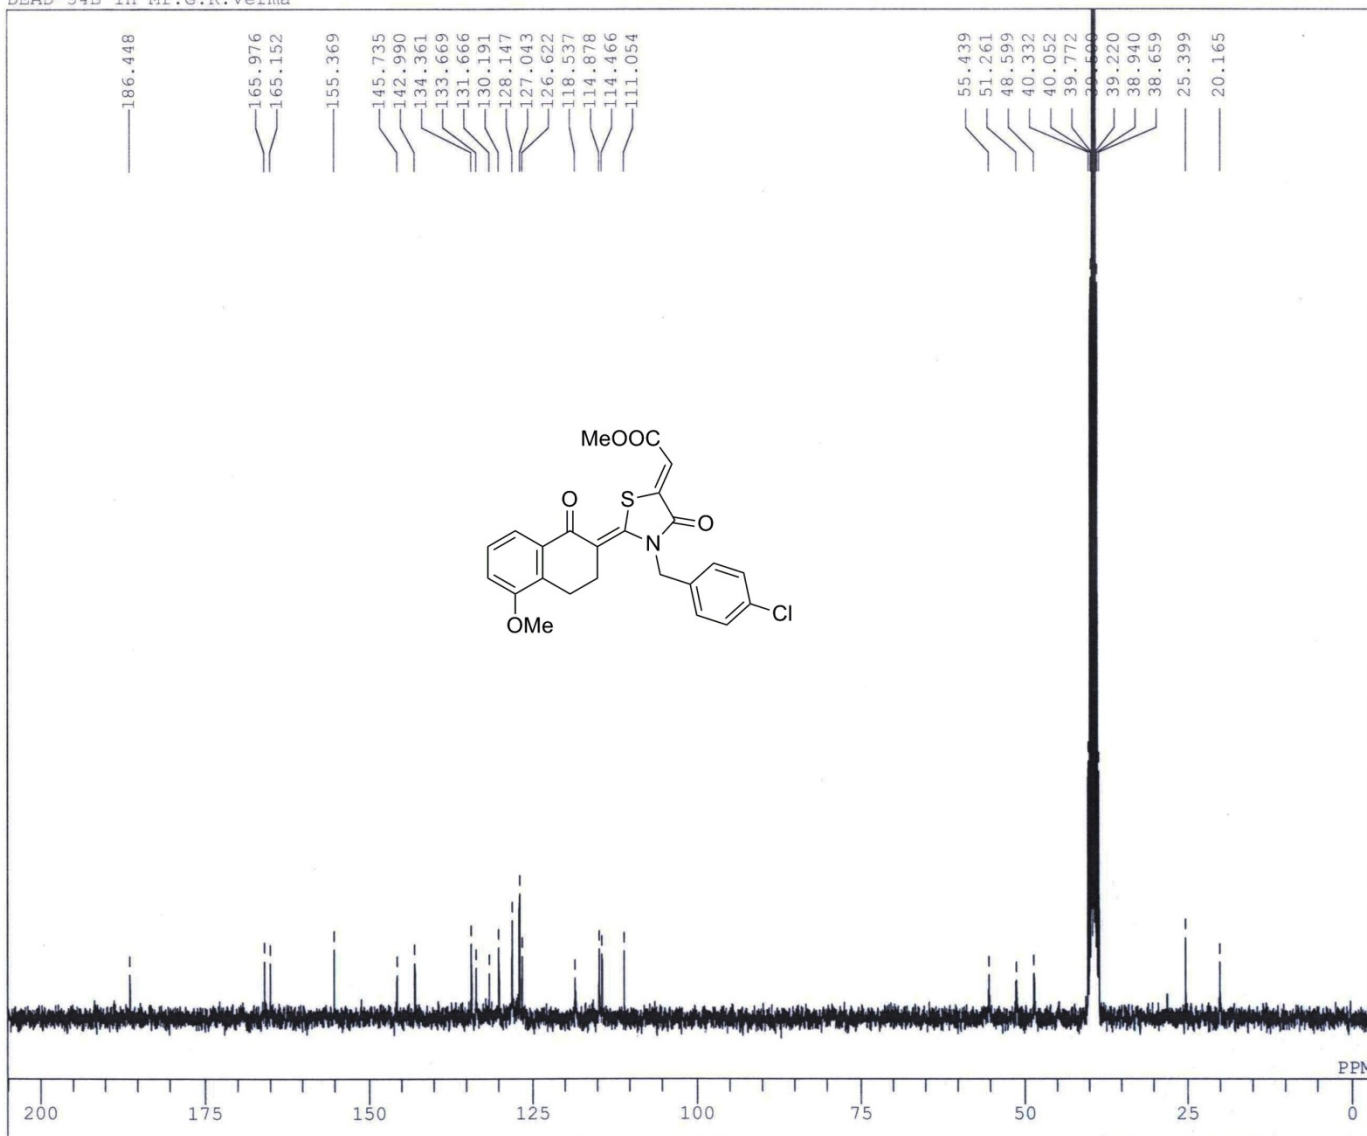

JEOL AL300 FTNMR  
CHEMISTRY DEPARTMENT  
Banaras Hindu University,  
VARANASI-221005

Operator : Nagendra Kumar  
Shishir Singh

DFILE C:\WINNMR98\Data\DEAD-34B\_1H2BCM\_E1.als  
COMNT DEAD-34B 1H Mr.G.K.Verma  
DATIM Thu Nov 21 20:24:58 2001  
OBNUC 13C  
EXMOD BCM  
OBFRQ 75.45 MHz  
OBSET 124.00 KHz  
OBSF 1840.0 Hz  
POINT 32768  
FREQU 20408.1 Hz  
SCANS 2500  
ACQTM 1.606 sec  
PD 1.394 sec  
PW1 5.9 us  
IRNUC 1H  
CTEMP 120.3 c  
SLVNT DMSO  
EXREF 39.50 ppm  
BF 1.20 Hz  
RGAIN 25
